# Supplementary material for: Systematic review and network meta-analysis of the relative efficacy and safety of edoxaban versus other nonvitamin K antagonist oral anticoagulants among patients with nonvalvular atrial fibrillation and CHADS2 score ⩾ 2
Source: PubMed Central journal article supplement — SAGE Open Med. 2015 Nov 23;3:2050312115613350. doi: 10.1177/2050312115613350 (PMC4822531; doi:10.1177/2050312115613350), 2015-11-23
Supplement: Network_Meta-analysis_Supplement-FINAL_2015September30.pdf [file Network_Meta-analysis_Supplement-FINAL_2015September30.pdf]

# Supplementary Material

## METHODS

### Search Strategy

An updated systematic search of the three databases was conducted for the period of March 1, 2013 to December 18, 2013, with the objective of capturing new subgroup analyses from phase 3 trials of dabigatran, rivaroxaban, and apixaban. No limits in terms of publication date or language were included in this search strategy.

### Data Extraction

A total of 43 variables were extracted using a standardized data abstraction form developed in Microsoft Excel (Table A-1). In addition, data for the outcomes of interest, if available, were extracted from the trials that compared a new oral anticoagulant versus warfarin in patients with CHADS<sub>2</sub> score  $\geq 2$  at baseline. In addition, edoxaban data were extracted from the clinical study report or post hoc analysis of ENGAGE AF-TIMI 48 (Effective Anticoagulation with Factor Xa Next Generation in Atrial Fibrillation–Thrombolysis In Myocardial Infarction study 48) if needed.

### Statistical Methods

The mixed Poisson regression model specific to this analysis can be described as follows:

$$y_{ij} \sim \text{Poisson}(\lambda_{ij}E_{ij})$$

$$\log(\lambda_{ij}) = t_j + s_i$$

where

- $y_{ij}$  is the number of events that occurred among the patients who received treatment  $j$  in study  $i$
- $\lambda_{ij}$  is the risk of events among the patients who received treatment  $j$  in study  $i$
- $E_{ij}$  is the exposure time contributed by the patients who received treatment  $j$  in study  $i$ , generally given in the format of person-years
- $t_j$  is the mean logarithm of risk for treatment  $j$
- $s_i$  are random study effects following a normal distribution with mean zero and unknown variance that account for the correlation between  $y_{ij}$  and  $y_{ij'}$  for  $j \neq j'$  when treatment groups come from the same study

It therefore follows that the risk of event due to treatment  $i$  is  $\lambda_i = \exp(t_i)$ , and the risk ratio (RR) of treatment  $a$  versus treatment  $b$  is defined as  $\lambda_a/\lambda_b = \exp(t_a - t_b)$ .

In this model, we assumed that risk is constant over the follow-up period. Suppose there are 1,000 person-years from one treatment  $j$  and study  $i$  after 1 year follow-up, then the mean of observed number of events is  $1,000\lambda_{ij}$ . If we follow up the patients for another 1.2 years and have a total of 2,000 person-years, then the mean number of events should be  $2,000\lambda_{ij}$ . This assumption is not true when the chance of events is varied according to the exposure time (e.g., for a type of adverse event that occurs immediately after the first treatment).

For each outcome analyzed using a model based on the Poisson distribution, the risk for specified treatment was estimated by  $\exp(\widehat{\beta}_1)$  with 95% confidence interval (CI) and the RR was estimated by  $\exp(\widehat{\beta}_1 - \widehat{\beta}_2)$  with 95% CI. The estimated risk, RR, and 95% CI are presented in the tables and forest plots. For consistency, person-years were derived by the ratio of number of events versus risk, even if person-years were provided separately.

## RESULTS

### Systematic Review and Summary of Included Trials

Of the 1,357 records identified in the initial literature search, 51 publications met the inclusion criteria. Eleven additional publications were identified from an updated systematic search of the literature. A total of 33 publications were identified as relevant. Of them, four phase 3 trials that compared a new oral anticoagulant versus warfarin and two publications<sup>1,2</sup> of these trials evaluating outcomes by CHADS<sub>2</sub> score were included in this meta-analysis. The four phase 3 trials were ARISTOTLE (apixaban),<sup>3</sup> ROCKET-AF (rivaroxaban),<sup>4</sup> RE-LY (dabigatran),<sup>5</sup> and ENGAGE AF-TIMI 48 (edoxaban).<sup>6</sup> The PRISMA checklist is presented in table A-2 and a list of excluded publications is presented in table A-3.

The average age of patients was similar among trials, as were the proportion of women recruited and the percentage of patients with prior myocardial infarction. However, there were a number of differences across these four trials in trial design, patients enrolled, and populations analyzed:

- The ARISTOTLE, ROCKET-AF, and ENGAGE AF-TIMI 48 trials were double-blind, double-dummy trials. In contrast, in the RE-LY trial, the assignments to dabigatran or warfarin were not concealed, and warfarin was administered as an open-label treatment.
- The RE-LY trial publication based all efficacy and safety analyses on the intention-to-treat (ITT) principle. In the ARISTOTLE trial publication, efficacy analyses were conducted on the ITT population and safety analyses on the on-treatment population. Analyses of efficacy in the ROCKET-AF trial publication were conducted on the ITT population only for the primary efficacy endpoint, and on a per-protocol population to demonstrate non-inferiority, with superiority and safety analyses run on the on-treatment population. In the ENGAGE AF-TIMI 48 trial, efficacy analyses were conducted on the ITT/modified ITT (mITT) overall study period and on-treatment populations, and safety analyses were conducted on the safety population during the on-treatment and overall study periods.
- Median follow-up ranged from 1.8 years in ARISTOTLE to 2.8 years in ENGAGE AF-TIMI 48.
- Subjects were enrolled in the ARISTOTLE, ENGAGE AF-TIMI 48, and RE-LY trials if they had a CHADS<sub>2</sub> score of  $\geq 1$ , whereas ROCKET-AF enrolled a higher-risk population (CHADS<sub>2</sub> score  $\geq 2$ ). At baseline, the mean CHADS<sub>2</sub> score for the ROCKET-AF trial was 3.4, compared with 2.1 for both RE-LY and ARISTOTLE.
- A larger proportion of patients with previous stroke or transient ischemic attack, with heart failure, or with diabetes were enrolled in ROCKET-AF than in the other trials.

- The mean percentage of time in which the international normalized ratio was in the therapeutic range of 2.0-3.0 for warfarin was 64% in the RE-LY trial, 62% in the ARISTOTLE trial, 55% in the ROCKET-AF trial, and 65% in the ENGAGE AF-TIMI 48 trial.

**Table A-1. Data Abstraction Form**

| <b>Worksheet</b>                | <b>Fields</b>                                                                                                                                                                                                                                                                                                                                                                         |
|---------------------------------|---------------------------------------------------------------------------------------------------------------------------------------------------------------------------------------------------------------------------------------------------------------------------------------------------------------------------------------------------------------------------------------|
| Study characteristics           | <ul style="list-style-type: none"> <li>▪ Record number</li> <li>▪ Reference</li> <li>▪ Follow-up duration; study duration</li> <li>▪ Study design</li> <li>▪ Study phase</li> <li>▪ Intention-to-treat analysis</li> <li>▪ Inclusion criteria</li> <li>▪ Exclusion criteria</li> <li>▪ Concomitant medications at baseline</li> </ul>                                                 |
| Baseline characteristics by arm | <ul style="list-style-type: none"> <li>▪ Record number</li> <li>▪ Age</li> <li>▪ Female (% patients)</li> <li>▪ BP</li> <li>▪ Type of AF</li> <li>▪ Diabetes (% patients)</li> <li>▪ Hypertension (% patients)</li> <li>▪ CHADS<sub>2</sub> score</li> <li>▪ Creatinine clearance</li> <li>▪ VKA naïve (% patients)</li> <li>▪ Definition of VKA naïve</li> <li>▪ Comments</li> </ul> |
| Treatments per arm              | <ul style="list-style-type: none"> <li>▪ Record number</li> <li>▪ Treatment group</li> <li>▪ Number randomized</li> <li>▪ Dosing schedule</li> <li>▪ Time in therapeutic range (% patients)</li> <li>▪ Dyspepsia, n (%)</li> <li>▪ Lost to follow-up, n (%)</li> <li>▪ Discontinuations, n (%)</li> </ul>                                                                             |

| Worksheet                     | Fields                                                                                                                                                                                                                                                                                                                                                                                                                                                                                                                                                                    |
|-------------------------------|---------------------------------------------------------------------------------------------------------------------------------------------------------------------------------------------------------------------------------------------------------------------------------------------------------------------------------------------------------------------------------------------------------------------------------------------------------------------------------------------------------------------------------------------------------------------------|
| Outcomes per arm <sup>a</sup> | <ul style="list-style-type: none"> <li>▪ Record number</li> <li>▪ Composite of stroke and systemic embolism</li> <li>▪ systemic embolism</li> <li>▪ Ischemic stroke</li> <li>▪ Hemorrhagic stroke</li> <li>▪ All-cause death</li> <li>▪ Cardiovascular mortality</li> <li>▪ MI</li> <li>▪ Composite of major bleeding or clinically relevant nonmajor bleeding</li> <li>▪ Major bleeding<sup>b</sup></li> <li>▪ Major gastrointestinal bleeding</li> <li>▪ Clinically relevant non-major bleeding</li> <li>▪ Fatal bleeding</li> <li>▪ Intracranial hemorrhage</li> </ul> |

Abbreviations: AF, atrial fibrillation; BP, blood pressure; CHADS<sub>2</sub>, stroke risk factor scoring system in which 1 point is given for history of congestive heart failure, hypertension, age ≥ 75 years, and diabetes, and 2 points are given for history of stroke or transient ischemic attack; CI, confidence interval; ITT, intention to treat; MACE, major adverse cardiac event; MI, myocardial infarction; TIA, transient ischemic attack; VKA, vitamin K antagonist.

<sup>a</sup> For each treatment arm, definition, type of analysis (e.g., ITT, per-protocol population), total number of patients analyzed, number of patients with events, and event rate (%/patient-year) were extracted for each outcome. In addition, hazard ratios between treatment groups with CIs, standard errors, and *P* values were also extracted.

<sup>b</sup>The Subcommittee on Control of Anticoagulation, of the Scientific and Standardization Committee of the ISTH, endorses the following criteria for major bleeding in non-surgical patients: (i) fatal bleeding, and/or (ii) symptomatic bleeding in a critical area or organ, such as intracranial, intraspinal, intraocular, retroperitoneal, intraarticular, or pericardial, or intramuscular with compartment syndrome, and/or (iii) bleeding causing a fall in hemoglobin level of 20g L (-1) (1.24 mmol/L[-1]) or more, or leading to a transfusion of two or more units of whole blood or red cells.

**Table A-2. PRISMA Checklist**

| Section/topic             | #  | Checklist item                                                                                                                                                                                                                                                                                              | Reported on page # |
|---------------------------|----|-------------------------------------------------------------------------------------------------------------------------------------------------------------------------------------------------------------------------------------------------------------------------------------------------------------|--------------------|
| <b>TITLE</b>              |    |                                                                                                                                                                                                                                                                                                             |                    |
| Title                     | 1  | Identify the report as a systematic review, meta-analysis, or both.                                                                                                                                                                                                                                         | 1                  |
| <b>ABSTRACT</b>           |    |                                                                                                                                                                                                                                                                                                             |                    |
| Structured summary        | 2  | Provide a structured summary including, as applicable: background; objectives; data sources; study eligibility criteria, participants, and interventions; study appraisal and synthesis methods; results; limitations; conclusions and implications of key findings; systematic review registration number. | 1                  |
| <b>INTRODUCTION</b>       |    |                                                                                                                                                                                                                                                                                                             |                    |
| Rationale                 | 3  | Describe the rationale for the review in the context of what is already known.                                                                                                                                                                                                                              | 2-3                |
| Objectives                | 4  | Provide an explicit statement of questions being addressed with reference to participants, interventions, comparisons, outcomes, and study design (PICOS).                                                                                                                                                  | 4-6                |
| <b>METHODS</b>            |    |                                                                                                                                                                                                                                                                                                             |                    |
| Protocol and registration | 5  | Indicate if a review protocol exists, if and where it can be accessed (e.g., Web address), and, if available, provide registration information including registration number.                                                                                                                               | NA                 |
| Eligibility criteria      | 6  | Specify study characteristics (e.g., PICOS, length of follow-up) and report characteristics (e.g., years considered, language, publication status) used as criteria for eligibility, giving rationale.                                                                                                      | 4                  |
| Information sources       | 7  | Describe all information sources (e.g., databases with dates of coverage, contact with study authors to identify additional studies) in the search and date last searched.                                                                                                                                  | 4                  |
| Search                    | 8  | Present full electronic search strategy for at least one database, including any limits used, such that it could be repeated.                                                                                                                                                                               | 4                  |
| Study selection           | 9  | State the process for selecting studies (i.e., screening, eligibility, included in systematic review, and, if applicable, included in the meta-analysis).                                                                                                                                                   | 4                  |
| Data collection process   | 10 | Describe method of data extraction from reports (e.g., piloted forms, independently, in duplicate) and any processes for obtaining and confirming data from investigators.                                                                                                                                  | 5                  |
| Data items                | 11 | List and define all variables for which data were sought (e.g., PICOS, funding sources) and any assumptions and simplifications made.                                                                                                                                                                       | 5-6                |



|                                    |    |                                                                                                                                                                                                                        |       |
|------------------------------------|----|------------------------------------------------------------------------------------------------------------------------------------------------------------------------------------------------------------------------|-------|
| Risk of bias in individual studies | 12 | Describe methods used for assessing risk of bias of individual studies (including specification of whether this was done at the study or outcome level), and how this information is to be used in any data synthesis. | 5     |
| Summary measures                   | 13 | State the principal summary measures (e.g., risk ratio, difference in means).                                                                                                                                          | 6-7   |
| Synthesis of results               | 14 | Describe the methods of handling data and combining results of studies, if done, including measures of consistency (e.g., $I^2$ ) for each meta-analysis.                                                              | 6-7   |
| Risk of bias across studies        | 15 | Specify any assessment of risk of bias that may affect the cumulative evidence (e.g., publication bias, selective reporting within studies).                                                                           | NA    |
| Additional analyses                | 16 | Describe methods of additional analyses (e.g., sensitivity or subgroup analyses, meta-regression), if done, indicating which were pre-specified.                                                                       | 6-7   |
| <b>RESULTS</b>                     |    |                                                                                                                                                                                                                        |       |
| Study selection                    | 17 | Give numbers of studies screened, assessed for eligibility, and included in the review, with reasons for exclusions at each stage, ideally with a flow diagram.                                                        | 4     |
| Study characteristics              | 18 | For each study, present characteristics for which data were extracted (e.g., study size, PICOS, follow-up period) and provide the citations.                                                                           | 5     |
| Risk of bias within studies        | 19 | Present data on risk of bias of each study and, if available, any outcome level assessment (see item 12).                                                                                                              | 5     |
| Results of individual studies      | 20 | For all outcomes considered (benefits or harms), present, for each study: (a) simple summary data for each intervention group (b) effect estimates and confidence intervals, ideally with a forest plot.               | 8-10  |
| Synthesis of results               | 21 | Present results of each meta-analysis done, including confidence intervals and measures of consistency.                                                                                                                | 8-10  |
| Risk of bias across studies        | 22 | Present results of any assessment of risk of bias across studies (see Item 15).                                                                                                                                        | NA    |
| Additional analysis                | 23 | Give results of additional analyses, if done (e.g., sensitivity or subgroup analyses, meta-regression [see Item 16]).                                                                                                  | 10    |
| <b>DISCUSSION</b>                  |    |                                                                                                                                                                                                                        |       |
| Summary of evidence                | 24 | Summarize the main findings including the strength of evidence for each main outcome; consider their relevance to key groups (e.g., healthcare providers, users, and policy makers).                                   | 11-13 |
| Limitations                        | 25 | Discuss limitations at study and outcome level (e.g., risk of bias), and at review-level (e.g., incomplete retrieval of identified research, reporting bias).                                                          | 12-13 |
| Conclusions                        | 26 | Provide a general interpretation of the results in the context of other evidence, and implications for future research.                                                                                                | 14    |

|                |    |                                                                                                                                            |    |
|----------------|----|--------------------------------------------------------------------------------------------------------------------------------------------|----|
| <b>FUNDING</b> |    |                                                                                                                                            |    |
| Funding        | 27 | Describe sources of funding for the systematic review and other support (e.g., supply of data); role of funders for the systematic review. | 14 |

NA= not available;

From: Moher D, Liberati A, Tetzlaff J, Altman DG, The PRISMA Group (2009). Preferred Reporting Items for Systematic Reviews and Meta-Analyses: The PRISMA Statement. PLoS Med 6(6): e1000097. doi:10.1371/journal.pmed1000097. Available at [www.prisma-statement.org](http://www.prisma-statement.org). Accessed on 29 July 2015.

**Table A-3. Excluded Studies and Reasons for Exclusion**

| Reference                                                                                                                                                                                                                                                                       | Ref ID | Reason                   |
|---------------------------------------------------------------------------------------------------------------------------------------------------------------------------------------------------------------------------------------------------------------------------------|--------|--------------------------|
| <b>Level 1 Screening (n = 1,101)</b>                                                                                                                                                                                                                                            |        |                          |
| [Embolic complications in atrial fibrillation. Data of the Studio Italiano Fibrillation Atriale (SIFA)]. G Chir 1995 Mar;16(3):137-9.                                                                                                                                           | 464    | Study Design             |
| [INR self monitoring: large study shows no prognostic value]. MMW Fortschr Med 2008 Nov 20;150(47):14.                                                                                                                                                                          | 191    | Intervention/Comparators |
| Aalbers J, Bryer A, Klug E. FDA committee unanimously recommends approval of dabigatran etexilate for stroke prevention in atrial fibrillation. Cardiovasc J Afr 2010 Nov;21(6):341.                                                                                            | 129    | Study Design             |
| Aalbers J, Wagenaar P, Klug E. New anti-coagulant therapies set to revitalise clinical haematology practice. Cardiovasc J Afr 2010 Nov;21(6):323-6, 337.                                                                                                                        | 130    | Study Design             |
| Aalbers J, Wagenaar P, Klug E. New anti-coagulant therapies set to revitalise clinical haematology practice: Annual meeting of the Southern African Society of Thrombosis and Haemostasis. Cardiovascular Journal of Africa 2010;21(6):323-6+337.                               | 734    | Study Design             |
| Aalbers J. New anticoagulants offer consistent stroke-reduction benefit in atrial fibrillation. Cardiovascular Journal of Africa 2012;23(3):168.                                                                                                                                | 612    | Study Design             |
| Aalbers J. Rivaroxaban equals warfarin treatment in atrial fibrillation patients at high risk of stroke. Cardiovasc J Afr 2010 Nov;21(6):342-3.                                                                                                                                 | 128    | Intervention/Comparators |
| Abdelhafiz AH, Myint MP, Tayek JA, Wheeldon NM. Anemia, hypoalbuminemia, and renal impairment as predictors of bleeding complications in patients receiving anticoagulation therapy for nonvalvular atrial fibrillation: a secondary analysis. Clin Ther 2009 Jul;31(7):1534-9. | 175    | Study Design             |
| Abdelhafiz AH, Wheeldon NM. Results of an open-label, prospective study of anticoagulant therapy for atrial fibrillation in an outpatient anticoagulation clinic. Clinical Therapeutics 2004;26(9):1470-8.                                                                      | 946    | Intervention/Comparators |
| Abi nasr I, Mansencal N, Dubourg O. Management of atrial fibrillation in heart failure in the elderly. International Journal of Cardiology 2008;125(2):178-82.                                                                                                                  | 843    | Study Design             |
| Abrol R, Page RL. Azimilide dihydrochloride: A new class III anti-arrhythmic agent. Expert Opinion on Investigational Drugs 2000;9(11):2705-15.                                                                                                                                 | 1060   | Study Design             |

| <b>Reference</b>                                                                                                                                                                                                                                                                         | <b>Ref ID</b> | <b>Reason</b>            |
|------------------------------------------------------------------------------------------------------------------------------------------------------------------------------------------------------------------------------------------------------------------------------------------|---------------|--------------------------|
| ACTIVE-W: warfarin beats clopidogrel/aspirin in atrial fibrillation. <i>Cardiovasc J S Afr</i> 2006 Mar;17(2):91.                                                                                                                                                                        | 260           | Intervention/Comparators |
| Ad N, Henry L, Schlauch K, Holmes SD, Hunt S. The CHADS score role in managing anticoagulation after surgical ablation for atrial fibrillation. <i>Annals of Thoracic Surgery</i> 2010;90(4):1257-62.                                                                                    | 736           | Study Design             |
| Adam SS, McDuffie JR, Ortel TL, Nagi A, Williams JW. 2012 Apr.                                                                                                                                                                                                                           | 41            | Study Population         |
| Adams Jr HP. 10 Most Commonly Asked Questions about which Antiplatelet Agent to Prescribe. <i>Neurologist</i> 2003;9(6):318-22.                                                                                                                                                          | 971           | Study Design             |
| Adjusted-dose warfarin versus low-intensity, fixed-dose warfarin plus aspirin for high-risk patients with atrial fibrillation: Stroke Prevention in Atrial Fibrillation III randomised clinical trial. <i>Lancet</i> 1996 Sep 7;348(9028):633-8.                                         | 448           | Intervention/Comparators |
| Agarwal S, Bennett D, Smith DJ. Predictors of warfarin use in atrial fibrillation patients in the inpatient setting. <i>Am J Cardiovasc Drugs</i> 2010;10(1):37-48.                                                                                                                      | 155           | Intervention/Comparators |
| Agbahiwe SO, Okeke C, Okonkwo O. Janssen pharmaceuticals' xarelto. <i>Pharm.Times</i> 77. 2011.                                                                                                                                                                                          | 648           | Study Design             |
| Agno W, Crowther M, Steidl L, Ultori C, Mera V, Dentali F, et al. Low dose oral vitamin K to reverse acenocoumarol-induced coagulopathy: A randomized controlled trial. <i>Thrombosis and Haemostasis</i> 2002;88(1):48-51.                                                              | 1013          | Study Population         |
| Aguirre FV, McMahon RP, Mueller H, Kleiman NS, Kern MJ, Desvigne-Nickens P, et al. Impact of age on clinical outcome and postlytic management strategies in patients treated with intravenous thrombolytic therapy: Results from the TIMI II study. <i>Circulation</i> 1994;90(1):78-86. | 1148          | Study Design             |
| Ahmad Y, Lip GYH, Apostolakis S. New oral anticoagulants for stroke prevention in atrial fibrillation: Impact of gender, heart failure, diabetes mellitus and paroxysmal atrial fibrillation. <i>Expert Review of Cardiovascular Therapy</i> 2012;10(12):1471-80.                        | 521           | Study Design             |
| Ahrens I, Bode C. Oral anticoagulation with edoxaban. Focus on current phase III clinical development. <i>Hamostaseologie</i> 2012;32(3):212-5.                                                                                                                                          | 34            | Study Design             |
| Ahrens I, Lip GY, Peter K. What do the RE-LY, AVERROES and ROCKET-AF trials tell us for stroke prevention in atrial fibrillation? <i>Thromb Haemost</i> 2011 Apr;105(4):574-8.                                                                                                           | 122           | Study Design             |
| Aizawa Y, Kohsaka S, Suzuki S, Atarashi H, Kamakura S, Sakurai M, et al. Comparison of antiarrhythmics used in patients with paroxysmal atrial fibrillation: Subanalysis of J-RHYTHM study. <i>Circulation Journal</i> 2010;74(1):71-6.                                                  | 776           | Intervention/Comparators |
| Akdeniz B, Badak O, Baris N, Aslan O, Kirimli O, Goldeli O, et al. Left atrial appendage-flow velocity predicts cardioversion success in atrial fibrillation. <i>Tohoku Journal of Experimental Medicine</i> 2006;208(3):243-50.                                                         | 897           | Study Design             |
| Akdeniz B, Turker S, Ozturk V, Badak O, Okan T, Aslan O, et al. Cardioversion under the guidance of transesophageal echocardiography in persistent atrial fibrillation: Results with low molecular weight heparin. <i>International Journal of Cardiology</i> 2005;98(1):49-55.          | 934           | Intervention/Comparators |

| <b>Reference</b>                                                                                                                                                                                                                                                                                                         | <b>Ref ID</b> | <b>Reason</b>            |
|--------------------------------------------------------------------------------------------------------------------------------------------------------------------------------------------------------------------------------------------------------------------------------------------------------------------------|---------------|--------------------------|
| Akins PT, Feldman HA, Zoble RG, Newman D, Spitzer SG, Diener HC, et al. Secondary stroke prevention with ximelagatran versus warfarin in patients with atrial fibrillation: pooled analysis of SPORTIF III and V clinical trials. <i>Stroke</i> 2007 Mar;38(3):874-80.                                                   | 241           | Intervention/Comparators |
| Al Suwaidi J, Zubaid M, Al-Mahmeed WA, Al-Rashdan I, Amin H, Bener A, et al. Impact of fasting in Ramadan in patients with cardiac disease. <i>Saudi Medical Journal</i> 2005;26(10):1579-83.                                                                                                                            | 916           | Study Population         |
| Albage A, van der Linden J, Lindblom D, Kenneback G, Nygren AT, Svedenhag J, et al. The maze operation for treatment of atrial fibrillation. <i>Scandinavian Cardiovascular Journal</i> 2000;34(5):480-5.                                                                                                                | 1058          | Intervention/Comparators |
| Albers GW, Atwood JE, Hirsh J, Sherman DG, Hughes RA, Connolly SJ. Stroke prevention in nonvalvular atrial fibrillation. <i>Ann Intern Med</i> 1991 Nov 1;115(9):727-36.                                                                                                                                                 | 492           | Study Design             |
| Albers GW, Dalen JE, Laupacis A, Manning WJ, Petersen P, Singer DE. Antithrombotic therapy in atrial fibrillation. <i>Chest</i> 2001;119(1 SUPPL.):194S-206S.                                                                                                                                                            | 1051          | Study Design             |
| Albers GW, Diener HC, Frison L, Grind M, Nevinson M, Partridge S, et al. Ximelagatran vs warfarin for stroke prevention in patients with nonvalvular atrial fibrillation: a randomized trial. <i>JAMA</i> 2005 Feb 9;293(6):690-8.                                                                                       | 296           | Intervention/Comparators |
| Albers GW. Antithrombotic therapy for prevention and treatment of ischemic stroke. <i>Journal of Thrombosis and Thrombolysis</i> 2001;12(1):19-22.                                                                                                                                                                       | 1024          | Study Design             |
| Albers GW. Atrial fibrillation and stroke: Three new studies, three remaining questions. <i>Archives of Internal Medicine</i> 1994;154(13):1443-8.                                                                                                                                                                       | 1146          | Study Design             |
| Alex J, Guvendik L. Evaluation of ventral cardiac denervation as a prophylaxis against atrial fibrillation after coronary artery bypass grafting. <i>Annals of Thoracic Surgery</i> 2005;79(2):517-20.                                                                                                                   | 932           | Study Population         |
| Alexander R, Ferretti AC, Sorensen JR. Stop the nonsense not the anticoagulants: a matter of life and death. <i>N Y State Dent J</i> 2002 Nov;68(9):24-6.                                                                                                                                                                | 349           | Study Design             |
| Alexander W, Connolly S, Arnesen H. European Society of Cardiology: Apixaban or aspirin in decreasing stroke risk (The AVERROES Trial). <i>P and T</i> 2010;35(10):580-1.                                                                                                                                                | 737           | Intervention/Comparators |
| Algra A, Koundstaal PJ, Van Gijn J. Secondary prevention after cerebral ischaemia: Monotherapy with acetylsalicylic acid still first choice? <i>Nederlands Tijdschrift voor Geneeskunde</i> 1998;142(6):277-80.                                                                                                          | 1103          | Intervention/Comparators |
| Al-Khadra AS, Salem DN, Rand WM, Udelson JE, Smith JJ, Konstam MA. Warfarin anticoagulation and survival: a cohort analysis from the Studies of Left Ventricular Dysfunction. <i>J Am Coll Cardiol</i> 1998 Mar 15;31(4):749-53.                                                                                         | 438           | Intervention/Comparators |
| Al-Khatib SM, Hafley G, Harrington RA, Mack MJ, Ferguson TB, Peterson ED, et al. Patterns of management of atrial fibrillation complicating coronary artery bypass grafting: Results from the PROject of Ex-vivo Vein graft ENgineering via Transfection IV (PREVENT-IV) Trial. <i>Am Heart J</i> 2009 Nov;158(5):792-8. | 166           | Intervention/Comparators |
| Al-Khatib SM, Pieper KS, Lee KL, Mahaffey KW, Hochman JS, Pepine CJ, et al. Atrial fibrillation and mortality among patients with acute coronary syndromes without ST-segment elevation: Results from the PURSUIT trial. <i>American Journal of Cardiology</i> 2001;88(1):76-9.                                          | 1044          | Study Population         |

| Reference                                                                                                                                                                                                                                                                                                                                                                                | Ref ID | Reason                   |
|------------------------------------------------------------------------------------------------------------------------------------------------------------------------------------------------------------------------------------------------------------------------------------------------------------------------------------------------------------------------------------------|--------|--------------------------|
| Almroth H, Hoglund N, Boman K, Englund A, Jensen S, Kjellman B, et al. Atorvastatin and persistent atrial fibrillation following cardioversion: A randomized placebo-controlled multicentre study. <i>European Heart Journal</i> 2009;30(7):827-33.                                                                                                                                      | 808    | Intervention/Comparators |
| Alonso-Coello P, Zhou Q, Guyatt G. Home-monitoring of oral anticoagulation vs. dabigatran: An indirect comparison. <i>Thrombosis and Haemostasis</i> 2012;108(4):647-53.                                                                                                                                                                                                                 | 564    | Intervention/Comparators |
| Alreja G, Chandrasekaran D, Trikalinos T, Rothberg M. Oral anticoagulants for secondary prophylaxis of stroke in coronary artery disease and cerebrovascular accident. <i>J Am Coll Cardiol</i> 2011;57(14):E1509.                                                                                                                                                                       | 701    | Study Population         |
| Amabile G, Matteoli S, Fattapposta F, Lavezzari M, Trappolini M, Heiman F, et al. [Italian Study on Atrial Fibrillation (SIFA): status report]. <i>Cardiologia</i> 1993 Dec;38(12 Suppl 1):327-32.                                                                                                                                                                                       | 475    | Intervention/Comparators |
| Amin A. New oral anticoagulants for stroke prevention in atrial fibrillation: An update for managed care and hospital decision-makers. <i>Formulary</i> 2012;47(8):299-305.                                                                                                                                                                                                              | 522    | Study Design             |
| Amin AN, Lin J, Thompson S, Wiederkehr D. Inpatient and outpatient occurrence of deep vein thrombosis and pulmonary embolism and thromboprophylaxis following selected at-risk surgeries. <i>Ann Pharmacother</i> 2011 Sep;45(9):1045-52.                                                                                                                                                | 87     | Study Design             |
| Andersen LV, Lip GY, Lindholt JS, Frost L. Upper limb arterial thromboembolism: A systematic review on incidence, risk factors, and prognosis including a meta-analysis of risk-modifying drugs. <i>J Thromb Haemost</i> 2013 Feb 25.                                                                                                                                                    | 2      | Study Population         |
| Anderson DC, Buckingham T, Hart RG, Kelley RE, Litin SC, McBride R, et al. Design of a multicenter randomized trial for the stroke prevention in atrial fibrillation study. <i>Stroke</i> 1990;21(4):538-45.                                                                                                                                                                             | 1165   | Study Design             |
| Anderson DC. Progress report of the Stroke Prevention in Atrial Fibrillation Study. <i>Stroke</i> 1990 Nov;21(11 Suppl):III12-III17.                                                                                                                                                                                                                                                     | 498    | Study Design             |
| Anderson J, O'Donnell M. Clinical trials of new anticoagulants. <i>Vnitri Lekarstvi</i> 2006;52(SUPPL. 1):123-6.                                                                                                                                                                                                                                                                         | 895    | Study Design             |
| Antiplatelet agents for stroke patients. <i>MeReC Bulletin</i> 2003;14(2):5-8.                                                                                                                                                                                                                                                                                                           | 975    | Study Design             |
| Antonielli E, Pizzuti A, Gandolfo N, Sclavo M, Tanga M, Riva G, et al. Short-term anticoagulation before electrical cardioversion of chronic atrial fibrillation. <i>Giornale Italiano di Cardiologia</i> 1997;27(8):803-10.                                                                                                                                                             | 1108   | Intervention/Comparators |
| Apixaban in other situations? <i>Prescrire Int</i> 2012 Sep;21(130):203.                                                                                                                                                                                                                                                                                                                 | 25     | Study Design             |
| Apixaban superior to warfarin in preventing stroke or systemic embolism. <i>Australian Journal of Pharmacy</i> 2012;93(1104):93.                                                                                                                                                                                                                                                         | 601    | Study Design             |
| Apostolakis S, Lane DA, Guo Y, Buller H, Lip GY. Performance of the HEMORR(2)HAGES, ATRIA, and HAS-BLED bleeding risk-prediction scores in patients with atrial fibrillation undergoing anticoagulation: the AMADEUS (evaluating the use of SR34006 compared to warfarin or acenocoumarol in patients with atrial fibrillation) study. <i>J Am Coll Cardiol</i> 2012 Aug 28;60(9):861-7. | 28     | Intervention/Comparators |
| Apostolakis S, Marin F, Lip GYH. Antiplatelet therapy in stroke prevention. <i>Adv.Cardiol.</i> 47, 141-154. 2012.                                                                                                                                                                                                                                                                       | 580    | Study Design             |

| Reference                                                                                                                                                                                                                                                                                                                                                   | Ref ID | Reason                   |
|-------------------------------------------------------------------------------------------------------------------------------------------------------------------------------------------------------------------------------------------------------------------------------------------------------------------------------------------------------------|--------|--------------------------|
| Appadu B, Morosan M. Drugs affecting coagulation. <i>Anaesthesia and Intensive Care Medicine</i> 2013;14(1):32-8.                                                                                                                                                                                                                                           | 518    | Study Design             |
| Aramendi JI, Mestres CA, Campos V, Martinez-Leon J, Pontes C, Munoz G, et al. Triflusal versus oral anticoagulation for primary prevention of thromboembolism after bioprosthetic valve replacement (TRAC): Rationale and design for a prospective, randomized, co-operative trial. <i>Interactive Cardiovascular and Thoracic Surgery</i> 2003;2(2):170-4. | 992    | Study Design             |
| Aramendi JI, Mestres CA, Martinez-Leon J, Campos V, Munoz G, Navas C. Triflusal versus oral anticoagulation for primary prevention of thromboembolism after bioprosthetic valve replacement (trac): prospective, randomized, co-operative trial. <i>Eur J Cardiothorac Surg</i> 2005 May;27(5):854-60.                                                      | 294    | Study Design             |
| Archer SL, James KE, Kvernen LR, Cohen IS, Ezekowitz MD, Gornick CC. Role of transesophageal echocardiography in the detection of left atrial thrombus in patients with chronic nonrheumatic atrial fibrillation. <i>Am Heart J</i> 1995 Aug;130(2):287-95.                                                                                                 | 460    | Intervention/Comparators |
| Arentz T, Weber R, Burkle G, Herrera C, Blum T, Stockinger J, et al. Small or large isolation areas around the pulmonary veins for the treatment of atrial fibrillation? Results from a prospective randomized study. <i>Circulation</i> 2007 Jun 19;115(24):3057-63.                                                                                       | 228    | Intervention/Comparators |
| Ariesen MJ, Algra A, Koudstaal PJ, Rothwell PM, Van Walraven C. Risk of Intracerebral Hemorrhage in Patients with Arterial Versus Cardiac Origin of Cerebral Ischemia on Aspirin or Placebo: Analysis of Individual Patient Data from 9 Trials. <i>Stroke</i> 2004;35(3):710-4.                                                                             | 964    | Intervention/Comparators |
| Arnold M, Nedeltchev K, Mattle HP. [Anticoagulation and antiaggregation in neurological patients]. <i>Ther Umsch</i> 2003 Jan;60(1):33-5.                                                                                                                                                                                                                   | 343    | Study Design             |
| Arnold M, Nedeltchev K, Mattle HP. Antiplatelet agents and anticoagulation in the neurological patient. <i>Therapeutische Umschau</i> 2003;60(1):33-5.                                                                                                                                                                                                      | 998    | Study Design             |
| Aronow WS. Special considerations for the elderly patient with atrial fibrillation. <i>Cardiac Electrophysiology Review</i> 2001;5(2-3):243-53.                                                                                                                                                                                                             | 1039   | Study Design             |
| Arsava EM. Prevention of stroke with medical treatment. <i>CardioVascular and Interventional Radiology</i> 2010;33:91-2.                                                                                                                                                                                                                                    | 743    | Study Design             |
| Asher CR, Klein AL. Transesophageal echocardiography to guide cardioversion in patients with atrial fibrillation: ACUTE trial update. <i>Cardiac Electrophysiology Review</i> 2003;7:387-91.                                                                                                                                                                | 1188   | Intervention/Comparators |
| Asher CR, Klein AL. Transesophageal echocardiography to guide electrical cardioversion in atrial fibrillation. <i>Cleveland Clinic Journal of Medicine</i> 2002;69(9):713-8.                                                                                                                                                                                | 1009   | Intervention/Comparators |
| Asinger RW, Koehler J, Pearce LA, Zabalgoitia M, Blackshear JL, Fenster PE, et al. Pathophysiologic correlates of thromboembolism in nonvalvular atrial fibrillation: II. Dense spontaneous echocardiographic contrast (The Stroke Prevention in Atrial Fibrillation [SPAF-III] study). <i>J Am Soc Echocardiogr</i> 1999 Dec;12(12):1088-96.               | 409    | Study Design             |
| Asopa S, Patel A, Dunning J. Is short-term anticoagulation necessary after mitral valve repair? <i>Interact Cardiovasc Thorac Surg</i> 2006 Dec;5(6):761-5.                                                                                                                                                                                                 | 224    | Study Design             |
| AstraZeneca reports on progress in its pharmaceutical research pipeline. <i>Manufacturing Chemist</i> 2001;72(1):9.                                                                                                                                                                                                                                         | 1054   | Study Design             |

| Reference                                                                                                                                                                                                                                                                                                                                    | Ref ID | Reason                   |
|----------------------------------------------------------------------------------------------------------------------------------------------------------------------------------------------------------------------------------------------------------------------------------------------------------------------------------------------|--------|--------------------------|
| Asukai Y, Duran A, Lloyd A, McLeod EJ, Evers T, Broughton J. Cost-effectiveness of rivaroxaban for the prevention of stroke and systemic embolism in adult patients with non-valvular atrial fibrillation with one or more risk factors-A UK perspective. <i>Value in Health</i> 2012;15(7):A371.                                            | 548    | Study Design             |
| Atarashi H, Endoh Y, Saitoh H, Kishida H, Hayakawa H. Chronotropic effects of cilostazol, a new antithrombotic agent, in patients with bradyarrhythmias. <i>Journal of Cardiovascular Pharmacology</i> 1998;31(4):534-9.                                                                                                                     | 1102   | Study Population         |
| Atarashi H, Inoue H, Okumura K, Yamashita T, Kumagai N, Origasa H. Present status of anticoagulation treatment in Japanese patients with atrial fibrillation - A report from the J-RHYTHM registry. <i>Circulation Journal</i> 2011;75(6):1328-33.                                                                                           | 684    | Study Design             |
| Atay JK, Fiumara K, Piazza G, Fanikos J, Goldhaber SZ. Hospital budget implications of substituting dabigatran for warfarin in an anticoagulation service. <i>Clinical and Applied Thrombosis/Hemostasis</i> 2012;18(2):181-4.                                                                                                               | 623    | Study Design             |
| Atrial fibrillation: rate control often better than rhythm control. <i>Prescrire Int</i> 2004 Apr;13(70):64-9.                                                                                                                                                                                                                               | 311    | Intervention/Comparators |
| Audebert HJ, Schenk B, Tietz V, Schenkel J, Heuschmann PU. Initiation of oral anticoagulation after acute ischaemic stroke or transient ischaemic attack: timing and complications of overlapping heparin or conventional treatment. <i>Cerebrovasc Dis</i> 2008;26(2):171-7.                                                                | 202    | Intervention/Comparators |
| Avanzini F, Latini R, Maggioni A, Colombo F, Santoro E, Franzosi MG, et al. Antiarrhythmic drug prescription in patients after myocardial infarction in the last decade: Experience of the Gruppo Italiano per lo Studio della Sopravvivenza nell'Infarto miocardico (GISSI). <i>Archives of Internal Medicine</i> 1995;155(10):1041-5.      | 1137   | Intervention/Comparators |
| Avellana P, Segovia J, Ferrero A, Vazquez R, Brugada J, Borrás X, et al. Anticoagulation therapy in patients with heart failure due to systolic dysfunction and sinus rhythm: Analysis of REDINSCOR registry. <i>Revista Espanola de Cardiologia</i> 2012;65(8):705-12.                                                                      | 582    | Study Population         |
| Avidan MS, Levy JH, Scholz J, Delphin E, Rosseel PMJ, Howie MB, et al. A phase III, double-blind, placebo-controlled, multicenter study on the efficacy of recombinant human antithrombin in heparin-resistant patients scheduled to undergo cardiac surgery necessitating cardiopulmonary bypass. <i>Anesthesiology</i> 2005;102(2):276-84. | 933    | Intervention/Comparators |
| Azoulay L, Dell'Aniello S, Simon T, Renoux C, Suissa S. Early effects on ischemic strokes after initiation of warfarin in patients with atrial fibrillation. <i>Circulation</i> 2012;126(21).                                                                                                                                                | 534    | Study Design             |
| Badheka AO, Rathod A, Kizilbash MA, Bhardwaj A, Ali O, Afonso L, et al. Comparison of mortality and morbidity in patients with atrial fibrillation and heart failure with preserved versus decreased left ventricular ejection fraction. <i>Am J Cardiol</i> 2011 Nov 1;108(9):1283-8.                                                       | 90     | Intervention/Comparators |
| Bai R, Fahmy TS, Patel D, Di Biase L, Riedlbauchova L, Wazni OM, et al. Radiofrequency ablation of atypical atrial flutter after cardiac surgery or atrial fibrillation ablation: A randomized comparison of open-irrigation-tip and 8-mm-tip catheters. <i>Heart Rhythm</i> 2007;4(12):1489-96.                                             | 849    | Intervention/Comparators |
| Baigent C, Sudlow C, Collins R, Peto R. Collaborative meta-analysis of randomised trials of antiplatelet therapy for prevention of death, myocardial infarction, and stroke in high risk patients. <i>British Medical Journal</i> 2002;324(7329):71-86.                                                                                      | 1022   | Study Population         |

| <b>Reference</b>                                                                                                                                                                                                                               | <b>Ref ID</b> | <b>Reason</b>            |
|------------------------------------------------------------------------------------------------------------------------------------------------------------------------------------------------------------------------------------------------|---------------|--------------------------|
| Bajorek BV, Krass I, Ogle SJ, Duguid MJ, Shenfield GM. Optimizing the use of antithrombotic therapy for atrial fibrillation in older people: a pharmacist-led multidisciplinary intervention. <i>J Am Geriatr Soc</i> 2005 Nov;53(11):1912-20. | 279           | Intervention/Comparators |
| Baker DW, Wright RF. Management of heart failure. IV. Anticoagulation for patients with heart failure due to left ventricular systolic dysfunction. <i>JAMA</i> 1994 Nov 23;272(20):1614-8.                                                    | 465           | Study Population         |
| Baker S, Ramani GV. Heart failure in the elderly. <i>Clinical Geriatrics</i> 2011;19(12):21-8.                                                                                                                                                 | 647           | Study Population         |
| Baker WL, Cios DA, Sander SD, Coleman CI. Meta-analysis to assess the quality of warfarin control in atrial fibrillation patients in the United States. <i>J Manag Care Pharm</i> 2009 Apr;15(3):244-52.                                       | 188           | Intervention/Comparators |
| Baker WL, Cios DA, Sander SD, Coleman CI. What is the quality of real world warfarin control in atrial fibrillation patients treated in the United States? A meta-analysis. <i>J Am Coll Cardiol</i> 2009;53(10):A384.                         | 817           | Intervention/Comparators |
| Balaji S, Silka MJ, McAnulty JH. Arrhythmias in patients with congenital heart disease. <i>Cardiac Electrophysiology Review</i> 2002;6(1-2):42-4.                                                                                              | 1019          | Study Design             |
| Ball J, Carrington MJ, Stewart S. Do clinical trial cohorts reflect the complexities of real-world patients with chronic atrial fibrillation? <i>European Heart Journal</i> 2012;33:955.                                                       | 575           | Study Design             |
| Barcellona D, Contu P, Marongiu F. A "two-step" educational approach for patients taking oral anticoagulants does not improve therapy control. <i>Journal of Thrombosis and Thrombolysis</i> 2006;22(3):185-90.                                | 883           | Intervention/Comparators |
| Barnett HJM, Gunton RW, Eliasziw M, Fleming L, Sharpe B, Gates P, et al. Causes and severity of ischemic stroke in patients with internal carotid artery stenosis. <i>Journal of the American Medical Association</i> 2000;283(11):1429-36.    | 1071          | Study Population         |
| Barras MA, Duffull SB, Atherton JJ, Green B. Individualized compared with conventional dosing of enoxaparin. <i>Clinical Pharmacology and Therapeutics</i> 2008;83(6):882-8.                                                                   | 838           | Intervention/Comparators |
| Barras MA, Duffull SB, Atherton JJ, Green B. Modelling the occurrence and severity of enoxaparin-induced bleeding and bruising events. <i>British Journal of Clinical Pharmacology</i> 2009;68(5):700-11.                                      | 782           | Study Design             |
| Barry AR, Ackman ML. Triple antithrombotic therapy in patients with atrial fibrillation who have undergone percutaneous coronary intervention with stent implantation. <i>American Journal of Health-System Pharmacy</i> 2012;69(17):1485-93.  | 567           | Study Population         |
| Barry PJ, Gallagher P, Ryan C, O'mahony D. START (screening tool to alert doctors to the right treatment)--an evidence-based screening tool to detect prescribing omissions in elderly patients. <i>Age Ageing</i> 2007 Nov;36(6):632-8.       | 220           | Intervention/Comparators |
| Baruch L, Gage BF, Horrow J, Juul-Moller S, Labovitz A, Persson M, et al. Can patients at elevated risk of stroke treated with anticoagulants be further risk stratified? <i>Stroke</i> 2007 Sep;38(9):2459-63.                                | 223           | Intervention/Comparators |
| Barwad P, Raheja A, Venkat R, Kothari SS, Bahl V, Karthikeyan G. High prevalence of silent brain infarction in patients presenting with mechanical heart valve thrombosis. <i>Am J Cardiovasc Drugs</i> 2012 Oct 1;12(5):345-8.                | 35            | Study Population         |



| <b>Reference</b>                                                                                                                                                                                                                                                                                  | <b>Ref ID</b> | <b>Reason</b>            |
|---------------------------------------------------------------------------------------------------------------------------------------------------------------------------------------------------------------------------------------------------------------------------------------------------|---------------|--------------------------|
| Baseline characteristics of patients with atrial fibrillation: the AFFIRM Study. <i>Am Heart J</i> 2002 Jun;143(6):991-1001.                                                                                                                                                                      | 360           | Intervention/Comparators |
| Bauer KA. New anticoagulants: Anti IIa vs anti Xa - Is one better? <i>Journal of Thrombosis and Thrombolysis</i> 2006;21(1):67-72.                                                                                                                                                                | 899           | Study Design             |
| Bayes M, Rabasseda X, Prous JR. Gateways to clinical trials: January/February 2007. <i>Methods and Findings in Experimental and Clinical Pharmacology</i> 2007;29(1):53-71.                                                                                                                       | 878           | Study Design             |
| Bechtold H, Kleist P, Landgraf K, Moser K. Influence of low-dose intravenous nitrate therapy on the anticoagulatory effect of heparin. <i>Medizinische Klinik</i> 1994;89(7):360-6.                                                                                                               | 1145          | Study Population         |
| Belavic JM. Dabigatran etexilate (Pradaxa) for the treatment of atrial fibrillation. <i>Nurse Pract</i> 2011 Sep;36(9):6-7.                                                                                                                                                                       | 89            | Study Design             |
| Belcher PR, Gaw A, Cooper M, Brown M, Wheatley DJ, Lindsay GM. Are we negating the benefits of CABG by forgetting secondary prevention? <i>Journal of Human Hypertension</i> 2002;16(10):691-7.                                                                                                   | 1005          | Study Population         |
| Bell C, Kapral M. Use of ambulatory electrocardiography for the detection of paroxysmal atrial fibrillation in patients with stroke. <i>Canadian Journal of Neurological Sciences</i> 2000;27(1):25-31.                                                                                           | 1072          | Intervention/Comparators |
| Benedini G, Marchini A, Curnis A, Bianchetti F, Gardini A, Pinetti P, et al. Implantable defibrillation and thromboembolic events. <i>PACE - Pacing and Clinical Electrophysiology</i> 1995;18(1 II):199-202.                                                                                     | 1141          | Study Design             |
| Benjo AM, Nascimento F, Macedo FYB, Javed F, Cornielle V, Pineda A, et al. Dabigatran consistently increases the risk of acute coronary disease: A randomized controlled trials meta-analysis. <i>J Am Coll Cardiol</i> 2012;59(13):E1871.                                                        | 617           | Study Population         |
| Berge E, Abdelnoor M, Nakstad PH, Sandset PM, Farquhar D. ASA or low-molecular-weight heparin in the initial management of acute ischemic stroke complicating atrial fibrillation? <i>Canadian Medical Association Journal</i> 2001;164(3):396.                                                   | 1055          | Intervention/Comparators |
| Berge E, Abdelnoor M, Nakstad PH, Sandset PM. Low molecular-weight heparin versus aspirin in patients with acute ischaemic stroke and atrial fibrillation: a double-blind randomised study. HAEST Study Group. Heparin in Acute Embolic Stroke Trial. <i>Lancet</i> 2000 Apr 8;355(9211):1205-10. | 397           | Intervention/Comparators |
| Berge E, Abdelnoor M, Nakstad PH, Sandset PM. Low molecular-weight heparin versus aspirin in patients with acute ischaemic stroke and atrial fibrillation: A double-blind randomised study. <i>Lancet</i> 2000;355(9211):1205-10.                                                                 | 1070          | Intervention/Comparators |
| Berge E, Sandercock-Peter AG. Anticoagulants versus antiplatelet agents for acute ischaemic stroke. <i>Cochrane Database of Systematic Reviews</i> 2002.                                                                                                                                          | 1170          | Study Population         |
| Berger PB. Assessment of Advantages and Disadvantages of Agents Used For Therapeutic Anticoagulation. <i>Disease-a-Month</i> 2012;58(8):462-8.                                                                                                                                                    | 581           | Study Design             |
| Bern MM, Bierbaum B, Wetzner S, Brennan W, McAlister S. Very low dose warfarin as prophylaxis against ultrasound detected deep vein thrombosis following primary hip replacement. <i>American Journal of Hematology</i> 2002;71(2):69-74.                                                         | 1006          | Intervention/Comparators |

| <b>Reference</b>                                                                                                                                                                                                                                                                                                                     | <b>Ref ID</b> | <b>Reason</b>            |
|--------------------------------------------------------------------------------------------------------------------------------------------------------------------------------------------------------------------------------------------------------------------------------------------------------------------------------------|---------------|--------------------------|
| Bernhardt P, Schmidt H, Hammerstingl C, Luderitz B, Omran H. Patients at high risk with atrial fibrillation: a prospective and serial follow-up during 12 months with transesophageal echocardiography and cerebral magnetic resonance imaging. <i>J Am Soc Echocardiogr</i> 2005 Sep;18(9):919-24.                                  | 281           | Intervention/Comparators |
| Berry C, Norrie J, McMurray JJ. Ximelagatran compared with warfarin for the prevention of systemic embolism and stroke. An imputed placebo analysis. <i>Cardiovasc Drugs Ther</i> 2005 Mar;19(2):149-51.                                                                                                                             | 284           | Intervention/Comparators |
| Besson G, Bogousslavsky J. [European atrial fibrillation trial (EAFT). Secondary prevention with anticoagulants and aspirin in patients with non-valvular atrial fibrillation having suffered a transient ischemic attack or a regressive vascular accident]. <i>Rev Med Suisse Romande</i> 1991 Jan;111(1):49-55.                   | 496           | Study Design             |
| Beyth RJ, Antani MR, Covinsky KE, Miller DG, Chren MM, Quinn LM, et al. Why isn't warfarin prescribed to patients with nonrheumatic atrial fibrillation? <i>Journal of General Internal Medicine</i> 1996;11(12):721-8.                                                                                                              | 1117          | Study Population         |
| Beyth RJ, Quinn L, Landefeld CS. A multicomponent intervention to prevent major bleeding complications in older patients receiving warfarin. A randomized, controlled trial. <i>Ann Intern Med</i> 2000 Nov 7;133(9):687-95.                                                                                                         | 386           | Intervention/Comparators |
| Beyth RJ. Review: High dose and moderate dose oral anticoagulants reduce events in coronary artery disease but increase major bleeding and are no more effective than aspirin. <i>Evidence-Based Medicine</i> 2000;5(4):111.                                                                                                         | 1064          | Study Design             |
| Biffi A, Devan WJ, Anderson CD, Ayres AM, Schwab K, Cortellini L, et al. Statin use and outcome after intracerebral hemorrhage: Case-control study and meta-analysis. <i>Neurology</i> 2011;76(18):1581-8.                                                                                                                           | 694           | Intervention/Comparators |
| Birks S. Wind of change blows through Bayer. <i>Manuf.Chem.</i> 81-82, 20-21. 2010.                                                                                                                                                                                                                                                  | 732           | Study Design             |
| Blackshear JL, Baker VS, Holland A, Litin SC, Ahlquist DA, Hart RG, et al. Fecal hemoglobin excretion in elderly patients with atrial fibrillation: combined aspirin and low-dose warfarin vs conventional warfarin therapy. <i>Arch Intern Med</i> 1996 Mar 25;156(6):658-60.                                                       | 453           | Intervention/Comparators |
| Blackshear JL, Zabalgoitia M, Pennock G, Fenster P, Strauss R, Halperin J, et al. Warfarin safety and efficacy in patients with thoracic aortic plaque and atrial fibrillation. SPAF TEE Investigators. <i>Stroke Prevention and Atrial Fibrillation. Transesophageal echocardiography. Am J Cardiol</i> 1999 Feb 1;83(3):453-5, A9. | 428           | Intervention/Comparators |
| Blackshear JL. Update on antithrombotic therapy in atrial fibrillation. <i>Cardiac Electrophysiology Review</i> 2001;5(2-3):217-21.                                                                                                                                                                                                  | 1038          | Study Design             |
| Blair KL, Hatton AC, White WD, Smith LR, Lowe JE, Wolfe WG, et al. Comparison of anticoagulation regimens after Carpentier-Edwards aortic or mitral valve replacement. <i>Circulation</i> 1994 Nov;90(5 Pt 2):II214-II219.                                                                                                           | 466           | Study Population         |
| Blakely JA. Anticoagulation in chronic nonvalvular atrial fibrillation: appraisal of two meta-analyses. <i>Can J Cardiol</i> 1998 Jul;14(7):945-8.                                                                                                                                                                                   | 433           | Study Design             |
| Blecic S. Acute stroke: Early diagnosis, follow-up and treatment. <i>Revue Medicale de Bruxelles</i> 2003;24(4):A369-A375.                                                                                                                                                                                                           | 985           | Study Design             |

| Reference                                                                                                                                                                                                                                                                                            | Ref ID | Reason                   |
|------------------------------------------------------------------------------------------------------------------------------------------------------------------------------------------------------------------------------------------------------------------------------------------------------|--------|--------------------------|
| Bleske BE, Welage LS, Warren EW, Brown MB, Shea MJ. Variations in prothrombin time and international normalized ratio over 24 hours in warfarin-treated patients. <i>Pharmacotherapy</i> 1995;15(6 I):709-12.                                                                                        | 1129   | Intervention/Comparators |
| Bloomfield H. Self-monitoring of oral anticoagulation reduces thromboembolic events and does not increase risk of bleeding in selected patients and settings. <i>Evidence-Based Medicine</i> 2012;17(6):e14.                                                                                         | 525    | Intervention/Comparators |
| Bo S, Valpreda S, Scaglione L, Boscolo D, Piobbici M, Bo M, et al. Implementing hospital guidelines improves warfarin use in non-valvular atrial fibrillation: a before-after study. <i>BMC Public Health</i> 2007;7:203.                                                                            | 222    | Intervention/Comparators |
| Body R, Allie B. Negative D-dimer may allow safe early cardioversion of atrial fibrillation. <i>Emergency Medicine Journal</i> 2007;24(6):432-3.                                                                                                                                                     | 861    | Study Design             |
| Boehlen F, de MP. [New anticoagulants: better knowledge, better prescriptions]. <i>Rev Med Suisse</i> 2012 Jan 18;8(324):96-9.                                                                                                                                                                       | 14     | Study Design             |
| Bollmann A, Tveit A, Husser D, Stridh M, Sornmo L, Smith P, et al. Fibrillatory rate response to candesartan in persistent atrial fibrillation. <i>Europace</i> 2008;10(10):1138-44.                                                                                                                 | 829    | Intervention/Comparators |
| Boos C, Ritzema J, More RS. A short course of oral amiodarone improves sinus rhythm maintenance post-cardioversion for atrial fibrillation. <i>Heart</i> 2004;90(9):1063-4.                                                                                                                          | 949    | Study Population         |
| Borg XC, Shaw RL, Lane DA. Patients' and health professionals' views and experiences of atrial fibrillation and oral-anticoagulant therapy: a qualitative meta-synthesis. <i>Patient Educ Couns</i> 2012 Aug;88(2):330-7.                                                                            | 40     | Study Design             |
| Borgman MP, Pendleton RC, McMillin GA, Reynolds KK, Vazquez S, Freeman A, et al. Prospective pilot trial of PerMIT versus standard anticoagulation service management of patients initiating oral anticoagulation. <i>Thromb Haemost</i> 2012 Sep;108(3):561-9.                                      | 29     | Study Design             |
| Boriani G, Biffi M, Zannoli R, Branzi A, Magnani B. Transvenous internal cardioversion for atrial fibrillation: a randomized study on defibrillation threshold and tolerability of asymmetrical compared with symmetrical shocks. <i>Int J Cardiol</i> 1999 Sep 30;71(1):63-9.                       | 412    | Intervention/Comparators |
| Botto GL, Bonini W, Broffoni T. Modulation of ventricular rate in permanent atrial fibrillation: randomized, crossover study of the effects of slow-release formulations of gallopamil, diltiazem, or verapamil. <i>Clin Cardiol</i> 1998 Nov;21(11):837-40.                                         | 431    | Intervention/Comparators |
| Bounameaux H. Overview of direct thrombin inhibitors in clinical practice. <i>Seminars in Thrombosis and Hemostasis</i> 2008;34(SUPPL. 1):12-7.                                                                                                                                                      | 824    | Study Design             |
| Bounhoure JP, Galinier M, Pathak A. [Anticoagulant treatment and cardiac insufficiency]. <i>Arch Mal Coeur Vaiss</i> 2000 Feb;93 Spec No 2:29-32.                                                                                                                                                    | 390    | Study Design             |
| Bounhoure JP, Galinier M, Pathak A. Anticoagulant therapy and cardiac failure. <i>Archives des Maladies du Coeur et des Vaisseaux</i> 2000;93(SPEC. ISS. 2):29-32.                                                                                                                                   | 1076   | Study Design             |
| Bousser MG, Bouthier J, Buller HR, Cohen AT, Crijns H, Davidson BL, et al. Comparison of idraparinux with vitamin K antagonists for prevention of thromboembolism in patients with atrial fibrillation: a randomised, open-label, non-inferiority trial. <i>Lancet</i> 2008 Jan 26;371(9609):315-21. | 207    | Intervention/Comparators |

| Reference                                                                                                                                                                                                                                                                                                                                                         | Ref ID | Reason                   |
|-------------------------------------------------------------------------------------------------------------------------------------------------------------------------------------------------------------------------------------------------------------------------------------------------------------------------------------------------------------------|--------|--------------------------|
| Bousser MG. Aspirin or heparin immediately after a stroke? <i>Lancet</i> 1997;349(9065):1564-5.                                                                                                                                                                                                                                                                   | 1109   | Intervention/Comparators |
| Boyce SW, Bandyk DF, Bartholomew JR, Frame JN, Rice L. A randomized, open-label pilot study comparing desirudin and argatroban in patients with suspected heparin-induced thrombocytopenia with or without thrombosis: PREVENT-HIT study. <i>American Journal of Therapeutics</i> 2011;18(1):14-22.                                                               | 726    | Study Design             |
| Bracey AW, Reyes MA, Chen AJ, Bayat M, Allison PM. How do we manage patients treated with antithrombotic therapy in the perioperative interval. <i>Transfusion</i> 2011;51(10):2066-77.                                                                                                                                                                           | 663    | Study Design             |
| Bradley DJ, Shen WK. Atrioventricular junction ablation combined with either right ventricular pacing or cardiac resynchronization therapy for atrial fibrillation: The need for large-scale randomized trials. <i>Heart Rhythm</i> 2007;4(2):224-32.                                                                                                             | 875    | Intervention/Comparators |
| Brass EP, Anthony R, Cobb FR, Koda I, Jiao J, Hiatt WR. The Novel Phosphodiesterase Inhibitor NM-702 Improves Claudication-Limited Exercise Performance in Patients With Peripheral Arterial Disease. <i>J Am Coll Cardiol</i> 2006;48(12):2539-45.                                                                                                               | 880    | Intervention/Comparators |
| Brignole M, Menozzi C, Gianfranchi L, Musso G, Mureddu R, Bottoni N, et al. Assessment of atrioventricular junction ablation and VVIR pacemaker versus pharmacological treatment in patients with heart failure and chronic atrial fibrillation: A randomized, controlled study. <i>Circulation</i> 1998;98(10):953-60.                                           | 1097   | Intervention/Comparators |
| Brooks RC, Hasley PB, Jasti H, Macpherson D. Update in general internal medicine: Evidence published in 2011. <i>Annals of Internal Medicine</i> 2012;156(9):649-54.                                                                                                                                                                                              | 604    | Study Design             |
| Bungard TJ, Ghali WA, Teo KK, McAlister FA, Tsuyuki RT. Why do patients with atrial fibrillation not receive warfarin? <i>Archives of Internal Medicine</i> 2000;160:41-6.                                                                                                                                                                                        | 1194   | Study Design             |
| Bungard TJ, Ritchie B, Garg S, Tsuyuki RT. Sustained impact of anticoagulant control achieved in an anticoagulation management service after transfer of management to the primary care physician. <i>Pharmacotherapy</i> 2012 Feb;32(2):112-9.                                                                                                                   | 58     | Intervention/Comparators |
| Bungard TJ, Sonnenberg B. Valvular heart disease: A primer for the clinical pharmacist. <i>Pharmacotherapy</i> 2011;31(1):76-91.                                                                                                                                                                                                                                  | 724    | Study Design             |
| Burton CD, Hamilton KE, Isles CG, Norrie J. Warfarin for nonvalvular atrial fibrillation in primary care--another example of the age paradox? <i>J Cardiovasc Risk</i> 2001 Oct;8(5):307-9.                                                                                                                                                                       | 369    | Study Design             |
| Bush D, Martin LW, Leman R, Chandler M, Haywood LJ. Atrial fibrillation among African Americans, Hispanics and Caucasians: Clinical features and outcomes from the AFFIRM trial. <i>Journal of the National Medical Association</i> 2006;98(3):330-9.                                                                                                             | 896    | Intervention/Comparators |
| Calkins H, Kuck KH, Cappato R, Brugada J, Camm AJ, Chen SA, et al. 2012 HRS/EHRA/ECAS expert consensus statement on catheter and surgical ablation of atrial fibrillation: Recommendations for patient selection, procedural techniques, patient management and follow-up, definitions, endpoints, and research trial design. <i>Europace</i> 2012;14(4):528-606. | 614    | Study Design             |
| Camm AJ, Pratt CM, Schwartz PJ, Al-Khalidi HR, Spyt MJ, Holroyde MJ, et al. Mortality in Patients after a Recent Myocardial Infarction: A Randomized, Placebo-Controlled Trial of Azimilide Using Heart Rate Variability for Risk Stratification. <i>Circulation</i> 2004;109(8):990-6.                                                                           | 963    | Intervention/Comparators |

| <b>Reference</b>                                                                                                                                                                                                                                                                                                 | <b>Ref ID</b> | <b>Reason</b>            |
|------------------------------------------------------------------------------------------------------------------------------------------------------------------------------------------------------------------------------------------------------------------------------------------------------------------|---------------|--------------------------|
| Cannon CP, Kohli P. Danger ahead: Watch out for indirect comparisons! J Am Coll Cardiol 2012;60(8):747-8.                                                                                                                                                                                                        | 570           | Study Design             |
| Capucci A, Prisco D. [The ROCKET AF study]. G Ital Cardiol (Rome) 2012 Sep;13(9):553-6.                                                                                                                                                                                                                          | 31            | Study Design             |
| Capucci A, Villani GQ, Aschieri D, Rosi A, Piepoli MF. Oral amiodarone increases the efficacy of direct-current cardioversion in restoration of sinus rhythm in patients with chronic atrial fibrillation. Eur Heart J 2000 Jan;21(1):66-73.                                                                     | 408           | Intervention/Comparators |
| Carlquist JF, Anderson JL. Using pharmacogenetics in real time to guide warfarin initiation: A clinician update. Circulation 2011;124(23):2554-9.                                                                                                                                                                | 641           | Study Design             |
| Caro JJ, Flegel KM, Orejuela ME, Kelley HE, Speckman JL, Migliaccio-Walle K. Anticoagulant prophylaxis against stroke in atrial fibrillation: effectiveness in actual practice. CMAJ 1999 Sep 7;161(5):493-7.                                                                                                    | 416           | Study Design             |
| Caro JJ, Groome PA, Flegel KM. Atrial fibrillation and anticoagulation: from randomised trials to practice. Lancet 1993 May 29;341(8857):1381-4.                                                                                                                                                                 | 483           | Study Design             |
| Carolei A, Sacco S, Marini C. Antiagregant therapy and/or anticoagulant therapy in the cerebrovascular patient. Haematologica 2001;86(11 SUPPL. 2):36-9.                                                                                                                                                         | 1028          | Study Population         |
| Carr LL, Mankoff DA, Goulart BH, Eaton KD, Capell PT, Kell EM, et al. Phase II study of daily sunitinib in FDG-PET-positive, iodine-refractory differentiated thyroid cancer and metastatic medullary carcinoma of the thyroid with functional imaging correlation. Clinical Cancer Research 2010;16(21):5260-8. | 735           | Intervention/Comparators |
| Carter G, Goss A, Lloyd J, Tocchetti R. Tranexamic Acid Mouthwash Versus Autologous Fibrin Glue in Patients Taking Warfarin Undergoing Dental Extractions: A Randomized Prospective Clinical Study. Journal of Oral and Maxillofacial Surgery 2003;61(12):1432-5.                                                | 968           | Study Population         |
| Carter G, Goss AN. Tranexamic acid mouthwash - A prospective randomized study of a 2-day regimen vs 5-day regimen to prevent postoperative bleeding in anticoagulated patients requiring dental extractions. International Journal of Oral and Maxillofacial Surgery 2003;32(5):504-7.                           | 979           | Intervention/Comparators |
| Casajuana J, Iglesias B, Fabregas M, Fina F, Valles JA, Aragones R, et al. Safety of intramuscular influenza vaccine in patients receiving oral anticoagulation therapy: A single blinded multi-centre randomized controlled clinical trial. BMC Blood Disorders 2008;8.                                         | 840           | Intervention/Comparators |
| Catherwood E, Teng MP, Melby DP. Cost-effectiveness of current management strategies in atrial fibrillation. Cardiac Electrophysiology Review 2001;5(2-3):254-62.                                                                                                                                                | 1040          | Study Design             |
| Cervera R, Espinosa G. Therapeutic perspectives in the antiphospholipid syndrome. Current Rheumatology Reviews 2011;7(4):313-21.                                                                                                                                                                                 | 658           | Study Design             |
| Chamorro A, Vila N, Ascaso C, Blanc R. Heparin in acute stroke with atrial fibrillation: clinical relevance of very early treatment. Arch Neurol 1999 Sep;56(9):1098-102.                                                                                                                                        | 419           | Intervention/Comparators |
| Chan FKL. Anti-platelet therapy and managing ulcer risk. Journal of Gastroenterology and Hepatology 2012;27(2):195-9.                                                                                                                                                                                            | 634           | Study Design             |
| Chan KL. Transesophageal echocardiographic correlates of thromboembolism in high- risk patients with nonvalvular atrial fibrillation. Annals of Internal Medicine 1998;128(8):639-47+685.                                                                                                                        | 1099          | Study Design             |

| Reference                                                                                                                                                                                                                                                                                                                                                                        | Ref ID | Reason                   |
|----------------------------------------------------------------------------------------------------------------------------------------------------------------------------------------------------------------------------------------------------------------------------------------------------------------------------------------------------------------------------------|--------|--------------------------|
| Chan PS, Maddox TM, Tang F, Spinler S, Spertus JA. Practice-level variation in warfarin use among outpatients with atrial fibrillation (from the NCDR PINNACLE program). <i>Am J Cardiol</i> 2011 Oct 15;108(8):1136-40.                                                                                                                                                         | 94     | Study Design             |
| Chaudhari D, Bhuriya R, Arora R. Newer anticoagulants as an alternate to warfarin in atrial fibrillation: A changing paradigm. <i>American Journal of Therapeutics</i> 2011;18(1):e1-e11.                                                                                                                                                                                        | 721    | Study Design             |
| Chen WT, White CM, Phung OJ, Kluger J, Ashaye AO, Sobieraj DM, et al. Association between CHADS2 risk factors and anticoagulation- related bleeding: A systematic literature review. <i>Mayo Clinic Proceedings</i> 2011;86(6):509-21.                                                                                                                                           | 687    | Study Design             |
| Chen Z, Sandercock P, Pan H, Councell C, Collins R, Liu L, et al. Indications for early aspirin use in acute ischemic stroke: A combined analysis of 40 000 randomized patients from the Chinese Acute Stroke Trial and the International Stroke Trial. <i>Stroke</i> 2000;31(6):1240-9.                                                                                         | 1069   | Intervention/Comparators |
| Chen ZM, Sandercock P, Pan HC, Counsell C, Collins R, Liu LS, et al. Indications for early aspirin use in acute ischemic stroke : A combined analysis of 40 000 randomized patients from the chinese acute stroke trial and the international stroke trial. On behalf of the CAST and IST collaborative groups. <i>Stroke; a journal of cerebral circulation</i> 2000;31:1240-9. | 1189   | Study Population         |
| Cheng A, Nazarian S, Brinker JA, Tompkins C, Spragg DD, Leng CT, et al. Continuation of warfarin during pacemaker or implantable cardioverter-defibrillator implantation: A randomized clinical trial. <i>Heart Rhythm</i> 2011;8(4):536-40.                                                                                                                                     | 704    | Intervention/Comparators |
| Cherian S, Azhakath T, Kirchoff-Torres K, Weinberger J. Resolution of occlusive common carotid thrombus with anticoagulation alone as demonstrated by sequential imaging with B-mode ultrasonography. <i>Journal of Neuroimaging</i> 2011;21(1):99.                                                                                                                              | 725    | Study Design             |
| Chesebro JH, Wiebers DO, Holland AE, Bardsley WT, Litin SC, Meissner I, et al. Bleeding during antithrombotic therapy in patients with atrial fibrillation. <i>Archives of Internal Medicine</i> 1996;156(4):409-16.                                                                                                                                                             | 1125   | Study Design             |
| Cheung CM, Tsoi TH, Huang CY. The lowest effective intensity of prophylactic anticoagulation for patients with atrial fibrillation. <i>Cerebrovasc Dis</i> 2005;20(2):114-9.                                                                                                                                                                                                     | 286    | Intervention/Comparators |
| Chinitz JS, Castellano JM, Kovacic JC, Fuster V. Atrial fibrillation, stroke, and quality of life. <i>Ann. New York Acad. Sci.</i> 1254, 140-150. 2012.                                                                                                                                                                                                                          | 611    | Study Design             |
| Choice of an oral anticoagulant in atrial fibrillation. <i>Medical Letter on Drugs and Therapeutics</i> 2012;54(1400):79-80.                                                                                                                                                                                                                                                     | 558    | Study Design             |
| Choudhry NK, Anderson GM, Laupacis A, Ross-Degnan D, Normand SL, Soumerai SB. Impact of adverse events on prescribing warfarin in patients with atrial fibrillation: matched pair analysis. <i>BMJ</i> 2006 Jan 21;332(7534):141-5.                                                                                                                                              | 272    | Intervention/Comparators |
| Christensen TD, Johnsen SP, Hjortdal VE, Hasenkam JM. Self-management of oral anticoagulant therapy: A systematic review and meta-analysis. <i>International Journal of Cardiology</i> 2007;118(1):54-61.                                                                                                                                                                        | 863    | Intervention/Comparators |
| Chung MK. Atrial fibrillation: Rate control is as good as rhythm control for some, but not all. <i>Cleveland Clinic Journal of Medicine</i> 2003;70(6):567-73.                                                                                                                                                                                                                   | 991    | Intervention/Comparators |

| <b>Reference</b>                                                                                                                                                                                                                                                                                                                           | <b>Ref ID</b> | <b>Reason</b>            |
|--------------------------------------------------------------------------------------------------------------------------------------------------------------------------------------------------------------------------------------------------------------------------------------------------------------------------------------------|---------------|--------------------------|
| Chung MK. Should patients receive anticoagulation for paroxysmal atrial fibrillation? <i>Cleve Clin J Med</i> 2000 Jan;67(1):9-10.                                                                                                                                                                                                         | 403           | Study Design             |
| Chung NA, Belgore F, Li-Saw-Hee FL, Conway DS, Blann AD, Lip GY. Is the hypercoagulable state in atrial fibrillation mediated by vascular endothelial growth factor? <i>Stroke</i> 2002 Sep;33(9):2187-91.                                                                                                                                 | 353           | Intervention/Comparators |
| Claes N, Buntinx F, Vijgen J, Arnout J, Vermeylen J, Fieuws S, et al. The Belgian Improvement Study on Oral Anticoagulation Therapy: a randomized clinical trial. <i>Eur Heart J</i> 2005 Oct;26(20):2159-65.                                                                                                                              | 290           | Study Population         |
| Cleland JG, Shelton R, Nikitin N, Ford S, Frison L, Grind M. Prevalence of markers of heart failure in patients with atrial fibrillation and the effects of ximelagatran compared to warfarin on the incidence of morbid and fatal events: a report from the SPORTIF III and V trials. <i>Eur J Heart Fail</i> 2007 Jun;9(6-7):730-9.      | 236           | Intervention/Comparators |
| Cleland JGF, Coletta AP, Buga L, Antony R, Pellicori P, Freemantle N, et al. Clinical trials update from the American Heart Association Meeting 2010: EMPHASIS-HF, RAFT, TIM-HF, Tele-HF, ASCEND-HF, ROCKET-AF, and PROTECT. <i>European Journal of Heart Failure</i> 2011;13(4):460-5.                                                    | 708           | Study Design             |
| Cleland JGF, Coletta AP, Lammiman M, Witte KK, Loh H, Nasir M, et al. Clinical trials update from the European Society of Cardiology meeting 2005: CARE-HF extension study, ESSENTIAL, CIBIS-III, S-ICD, ISSUE-2, STRIDE-2, SOFA, IMAGINE, PREAMI, SIRIUS-II and ACTIVE. <i>European Journal of Heart Failure</i> 2005;7(6):1070-5.        | 912           | Study Design             |
| Cleland JGF, Cowburn PJ, Falk RH. Should all patients with atrial fibrillation receive warfarin? Evidence from randomized clinical trials. <i>European Heart Journal</i> 1996;17(5):674-81.                                                                                                                                                | 1123          | Study Design             |
| Clemens A, Haertter S, Friedman J, Brueckmann M, Stangier J, van RJ, et al. Twice daily dosing of dabigatran for stroke prevention in atrial fibrillation: a pharmacokinetic justification. <i>Curr Med Res Opin</i> 2012 Feb;28(2):195-201.                                                                                               | 70            | Study Design             |
| Clopidogrel/aspirin combination therapy in high-risk atrial fibrillation patients. <i>Cardiovasc J Afr</i> 2009 May;20(3):210.                                                                                                                                                                                                             | 180           | Intervention/Comparators |
| Cohen M, Smetzer J. QuarterWatch signals for two newly approved drugs: Dabigatran and dalfampridine; Include purpose on Rx; Use of two pumps allows bypass of drug library; Anesthesia patient safety foundation tackles postoperative opioid monitoring; Lilly updates humulin R U-500 label. <i>Hospital Pharmacy</i> 2011;46(12):922-7. | 646           | Study Design             |
| Cohn PF. Role of antiplatelet agents in cardioprotection. <i>American Journal of Managed Care</i> 2002;8(9 SUPPL.):38-9.                                                                                                                                                                                                                   | 1014          | Study Design             |
| Coleman CI, Baczek VL, Chen WT, Kluger J. Predictors of warfarin use in atrial fibrillation in the united states. <i>Stroke</i> 2012;43(2).                                                                                                                                                                                                | 632           | Study Design             |
| Coleman CI, Sobieraj DM, Winkler S, Cutting P, Mediouni M, Alikhanov S, et al. Effect of pharmacological therapies for stroke prevention on major gastrointestinal bleeding in patients with atrial fibrillation (Structured abstract). <i>International Journal of Clinical Practice</i> 2012;66:53-63.                                   | 1185          | Study Design             |
| Coletta AP, Cleland JGF. Clinical trials update: Highlights of the scientific sessions of the XXIII Congress of the European Society of Cardiology - WARIS II, ESCAMI, PAFAC, RITZ-1 and TIME. <i>European Journal of Heart Failure</i> 2001;3(6):747-50.                                                                                  | 1023          | Study Design             |

| <b>Reference</b>                                                                                                                                                                                                                                                                                                                                           | <b>Ref ID</b> | <b>Reason</b>            |
|------------------------------------------------------------------------------------------------------------------------------------------------------------------------------------------------------------------------------------------------------------------------------------------------------------------------------------------------------------|---------------|--------------------------|
| Collet JP, Choussat R, Montalescot G. LMWH in coronary artery disease: A review and future perspectives. <i>Archives des Maladies du Coeur et des Vaisseaux</i> 2001;94(11 SUPPL.):1233-42.                                                                                                                                                                | 1025          | Study Design             |
| Colli A, Mestres CA, Castella M, Gherli T. Comparing warfarin to aspirin (WoA) after aortic valve replacement with the St. Jude Medical Epic heart valve bioprosthesis: results of the WoA Epic pilot trial. <i>J Heart Valve Dis</i> 2007 Nov;16(6):667-71.                                                                                               | 213           | Study Design             |
| Coluzzi G, Navarese EP, Andreotti F. EuroThrombosis: Annual meeting of the European Society of Cardiology Working Group on Thrombosis. <i>Expert Review of Hematology</i> 2012;5(1):39-42.                                                                                                                                                                 | 635           | Study Design             |
| Connolly S, Pogue J, Hart R, Pfeffer M, Hohnloser S, Chrolavicius S, et al. Clopidogrel plus aspirin versus oral anticoagulation for atrial fibrillation in the Atrial fibrillation Clopidogrel Trial with Irbesartan for prevention of Vascular Events (ACTIVE W): a randomised controlled trial. <i>Lancet</i> 2006 Jun 10;367(9526):1903-12.            | 259           | Intervention/Comparators |
| Connolly SJ, Eikelboom JW, Ng J, Hirsh J, Yusuf S, Pogue J, et al. Net clinical benefit of adding clopidogrel to aspirin therapy in patients with atrial fibrillation for whom vitamin K antagonists are unsuitable. <i>Ann Intern Med</i> 2011 Nov 1;155(9):579-86.                                                                                       | 75            | Intervention/Comparators |
| Connolly SJ, Ezekowitz MD, Gretler DD, Gorina E, Denney WS, Laurant B, et al. Effects of the oral factor Xa inhibitor Betrixaban on pharmacodynamic markers in EXPLORE-Xa, a phase II atrial fibrillation study. <i>European Heart Journal</i> 2010;31:107.                                                                                                | 745           | Study Design             |
| Connolly SJ, Laupacis A, Gent M, Roberts RS, Cairns JA, Joyner C. Canadian Atrial Fibrillation Anticoagulation (CAFA) Study. <i>J Am Coll Cardiol</i> 1991 Aug;18(2):349-55.                                                                                                                                                                               | 495           | Intervention/Comparators |
| Connolly SJ, Pogue J, Eikelboom J, Flaker G, Commerford P, Franzosi MG, et al. Benefit of oral anticoagulant over antiplatelet therapy in atrial fibrillation depends on the quality of international normalized ratio control achieved by centers and countries as measured by time in therapeutic range. <i>Circulation</i> 2008 Nov 11;118(20):2029-37. | 199           | Intervention/Comparators |
| Connolly SJ, Pogue J, Hart RG, Hohnloser SH, Pfeffer M, Chrolavicius S, et al. Effect of clopidogrel added to aspirin in patients with atrial fibrillation. <i>N Engl J Med</i> 2009 May 14;360(20):2066-78.                                                                                                                                               | 187           | Intervention/Comparators |
| Connolly SJ. Prevention of vascular events in patients with atrial fibrillation: Evidence, guidelines, and practice. <i>Journal of Cardiovascular Electrophysiology</i> 2003;14(9 SUPPL.):S52-S55.                                                                                                                                                         | 980           | Study Design             |
| Connolly SJ. Role of antithrombotic therapy in atrial fibrillation. <i>Giornale Italiano di Cardiologia</i> 1994;24(3):341-3.                                                                                                                                                                                                                              | 1147          | Study Design             |
| Conway DSG, Pearce LA, Chin BSP, Hart RG, Lip GYH. Prognostic value of plasma von Willebrand factor and soluble P-selectin as indices of endothelial damage and platelet activation in 994 patients with nonvalvular atrial fibrillation. <i>Circulation</i> 2003;107(25):3141-5.                                                                          | 989           | Study Design             |
| Cooper HA, Bloomfield DA, Bush DE, Katcher MS, Rawlins M, Sacco JD, et al. Relation between achieved heart rate and outcomes in patients with atrial fibrillation (from the Atrial Fibrillation Follow-up Investigation of Rhythm Management [AFFIRM] Study). <i>Am J Cardiol</i> 2004 May 15;93(10):1247-53.                                              | 314           | Intervention/Comparators |
| Cooper NJ, Peters J, Lai MCW, Juni P, Wandel S, Palmer S, et al. How valuable are multiple treatment comparison methods in evidence-based health-care evaluation. <i>Value in Health</i> 2011;14(2):371-80.                                                                                                                                                | 713           | Study Design             |



| <b>Reference</b>                                                                                                                                                                                                                                                                                   | <b>Ref ID</b> | <b>Reason</b>            |
|----------------------------------------------------------------------------------------------------------------------------------------------------------------------------------------------------------------------------------------------------------------------------------------------------|---------------|--------------------------|
| Cooper NJ, Sutton AJ, Morris D, Ades AE, Welton NJ. Addressing between-study heterogeneity and inconsistency in mixed treatment comparisons: Application to stroke prevention treatments in individuals with non-rheumatic atrial fibrillation. <i>Statistics in Medicine</i> 2009;28(14):1861-81. | 797           | Study Design             |
| Cordonnier C, Leys D, Deplanque D, Henon H. Antithrombotic agents' use in patients with atrial fibrillation and acute cerebral ischemia. <i>J Neurol</i> 2006 Aug;253(8):1076-82.                                                                                                                  | 263           | Study Design             |
| Corley SD, Epstein AE, DiMarco JP, Domanski MJ, Geller N, Greene HL, et al. Relationships between sinus rhythm, treatment, and survival in the Atrial Fibrillation Follow-Up Investigation of Rhythm Management (AFFIRM) Study. <i>Circulation</i> 2004 Mar 30;109(12):1509-13.                    | 321           | Intervention/Comparators |
| Cox JL, Ad N, Palazzo T, Schaff HV. Impact of the maze procedure on the stroke rate in patients with atrial fibrillation. <i>Journal of Thoracic and Cardiovascular Surgery</i> 1999;118(5):833-40.                                                                                                | 1078          | Intervention/Comparators |
| Crowther MA, Ageno W, Garcia D, Wang L, Witt DM, Clark NP, et al. Oral vitamin K versus placebo to correct excessive anticoagulation in patients receiving warfarin: A randomized trial. <i>Annals of Internal Medicine</i> 2009;150(5):X293-X300.                                                 | 811           | Intervention/Comparators |
| Cruz-Gonzalez I, Yan BP, Lam YY. Left atrial appendage exclusion: State-of-the-art. <i>Catheterization and Cardiovascular Interventions</i> 2010;75(5):806-13.                                                                                                                                     | 765           | Study Design             |
| Culhane NS. Can a simple warfarin initiation scheme predict the maintenance dose in patients with nonrheumatic atrial fibrillation? <i>J Fam Pract</i> 2002 Feb;51(2):175.                                                                                                                         | 366           | Study Design             |
| Cundiff DK. Anticoagulants for nonvalvular atrial fibrillation (NVAf)--drug review. <i>MedGenMed</i> 2003 Feb 6;5(1):4.                                                                                                                                                                            | 335           | Study Design             |
| Curtis AB, Gersh BJ, Corley SD, DiMarco JP, Domanski MJ, Geller N, et al. Clinical factors that influence response to treatment strategies in atrial fibrillation: the Atrial Fibrillation Follow-up Investigation of Rhythm Management (AFFIRM) study. <i>Am Heart J</i> 2005 Apr;149(4):645-9.   | 289           | Intervention/Comparators |
| Dabigatran and risk of acute coronary events. <i>Drug and Therapeutics Bulletin</i> 2012;50(3):29.                                                                                                                                                                                                 | 627           | Study Design             |
| Dabigatran compared to warfarin when given to patients with atrial fibrillation. <i>Formulary</i> 2010;45(1):16.                                                                                                                                                                                   | 773           | Study Design             |
| Dabigatran increases risk of acute coronary syndromes, new meta-analysis suggests. <i>Clinical Pharmacist</i> 2012;4(2):38.                                                                                                                                                                        | 633           | Study Design             |
| Dabigatran: safer, more effective and easier to use than warfarin. <i>Cardiovasc J Afr</i> 2009 Sep;20(5):311-2.                                                                                                                                                                                   | 165           | Study Design             |
| Dahl OE, Huisman MV. Dabigatran etexilate: Advances in anticoagulation therapy. <i>Expert Review of Cardiovascular Therapy</i> 2010;8(6):771-4.                                                                                                                                                    | 758           | Study Design             |
| Dahl T, Abildgaard U, Sandset PM. Long-term anticoagulant therapy in cerebrovascular disease: Does bleeding outweigh the benefit? <i>Journal of Internal Medicine</i> 1995;237(3):323-9.                                                                                                           | 1138          | Study Population         |
| Dalen JE. Prevention of embolic strokes: the role of the American College of Chest Physicians. <i>Chest</i> 2012 Feb;141(2):294-9.                                                                                                                                                                 | 61            | Study Design             |
| Danese E, Montagnana M, Johnson JA, Rettie AE, Zambon CF, Lubitz SA, et al. Impact of the CYP4F2 p.V433M polymorphism on coumarin dose requirement: Systematic review and meta-analysis. <i>Clinical Pharmacology and Therapeutics</i> 2012;92(6):746-56.                                          | 527           | Study Design             |

| Reference                                                                                                                                                                                                                                                                                                                              | Ref ID | Reason                   |
|----------------------------------------------------------------------------------------------------------------------------------------------------------------------------------------------------------------------------------------------------------------------------------------------------------------------------------------|--------|--------------------------|
| Darby AE, DiMarco JP. Management of atrial fibrillation in patients with structural heart disease. <i>Circulation</i> 2012;125(7):945-57.                                                                                                                                                                                              | 628    | Study Design             |
| Davidson T, Husberg M, Janzon M, Oldgren J, Levin LA. Cost-effectiveness of dabigatran compared with warfarin for patients with atrial fibrillation in Sweden. <i>European Heart Journal</i> 2013;34(3):177-83.                                                                                                                        | 515    | Study Design             |
| Davies BE, Baldo PA, Lennon-Chrimes S, Brewster M. Effect of oseltamivir treatment on anticoagulation: A cross-over study in warfarinized patients. <i>British Journal of Clinical Pharmacology</i> 2010;70(6):834-43.                                                                                                                 | 730    | Intervention/Comparators |
| Dawson NA, Halabi S, Ou SS, Biggs DD, Kessinger A, Vogelzang N, et al. A phase II study of estramustine, docetaxel, and exisulind in patients with hormone-refractory prostate cancer: Results of cancer and leukemia group B trial 90004. <i>Clinical Genitourinary Cancer</i> 2008;6(2):110-6.                                       | 825    | Study Population         |
| de Assis MC, Rabelo ER, Avila CW, Polanczyk CA, Rohde LE. Improved oral anticoagulation after a dietary vitamin k-guided strategy: a randomized controlled trial. <i>Circulation</i> 2009 Sep 22;120(12):1115-22, 3.                                                                                                                   | 170    | Intervention/Comparators |
| de Boer RA, Hillege HL, Tjeerdsma G, Verheugt FW, Van Veldhuisen DJ. Both antiplatelet and anticoagulant therapy may favorably affect outcome in patients with advanced heart failure. A retrospective analysis of the PRIME-II trial. <i>Thromb Res</i> 2005;116(4):279-85.                                                           | 283    | Study Population         |
| De Caterina R, Husted S, Wallentin L, Andreotti F, Arnesen H, Bachmann F, et al. New oral anticoagulants in atrial fibrillation and acute coronary syndromes: ESC working group on thrombosis - Task force on anticoagulants in heart disease position paper. <i>J Am Coll Cardiol</i> 2012;59(16):1413-25.                            | 606    | Study Design             |
| De Caterina R. Future perspectives in oral anticoagulation. <i>Pathophysiology of Haemostasis and Thrombosis</i> 2010;37:122.                                                                                                                                                                                                          | 740    | Study Design             |
| De CR, Connolly SJ, Pogue J, Chrolavicius S, Budaj A, Morais J, et al. Mortality predictors and effects of antithrombotic therapies in atrial fibrillation: insights from ACTIVE-W. <i>Eur Heart J</i> 2010 Sep;31(17):2133-40.                                                                                                        | 143    | Study Design             |
| De Jong JS, Vink R, Henny CP, Levi M, Van Den Brink RBA, Kamphuisen PW. Perioperative interruption of anticoagulants: Practical recommendations. <i>Nederlands Tijdschrift voor Geneeskunde</i> 2009;153(33):1622-8.                                                                                                                   | 787    | Study Design             |
| De La Cruz JP. What is new on the pharmacology of the antithrombotic agents. <i>Basic and Clinical Pharmacology and Toxicology</i> 2011;109:11.                                                                                                                                                                                        | 659    | Study Design             |
| De Santo LS, Romano G, Della Corte A, Tizzano F, Petraio A, Amarelli C, et al. Mitral mechanical replacement in young rheumatic women: Analysis of long-term survival, valve-related complications, and pregnancy outcomes over a 3707-patient-year follow-up. <i>Journal of Thoracic and Cardiovascular Surgery</i> 2005;130(1):13-9. | 921    | Study Population         |
| De Schryver EL. Design of ESPRIT: an international randomized trial for secondary prevention after non-disabling cerebral ischaemia of arterial origin. <i>European/Australian Stroke Prevention in Reversible Ischaemia Trial (ESPRIT) group. Cerebrovasc Dis</i> 2000 Mar;10(2):147-50.                                              | 402    | Study Design             |

| Reference                                                                                                                                                                                                                                                                                                   | Ref ID | Reason                   |
|-------------------------------------------------------------------------------------------------------------------------------------------------------------------------------------------------------------------------------------------------------------------------------------------------------------|--------|--------------------------|
| De Schryver ELLM. Design of ESPRIT: An international randomized trial for secondary prevention after non-disabling cerebral ischaemia of arterial origin. <i>Cerebrovascular Diseases</i> 2000;10(2):147-50.                                                                                                | 1073   | Study Design             |
| De Silva R. Is dual antiplatelet therapy needed for all CVD patients? <i>British Journal of Cardiology</i> 2010;17(SUPPL. 1):S10-S11.                                                                                                                                                                       | 770    | Study Population         |
| De Simone A, De Pasquale M, De Matteis C, Canciello M, Manzo M, Sabino L, et al. Verapamil plus antiarrhythmic drugs reduce atrial fibrillation recurrences after an electrical cardioversion (VEPARAF study). <i>European Heart Journal</i> 2003;24(15):1425-9.                                            | 988    | Intervention/Comparators |
| de Voogt W, van Hemel N, de Vusser P, Mairesse GH, van Mechelen R, Koistinen J, et al. No evidence of automatic atrial overdrive pacing efficacy on reduction of paroxysmal atrial fibrillation. <i>Europace</i> 2007;9(9):798-804.                                                                         | 855    | Intervention/Comparators |
| Deerhake JP, Merz JC, Cooper JV, Eagle KA, Fay WP. The duration of anticoagulation bridging therapy in clinical practice may significantly exceed that observed in clinical trials. <i>J Thromb Thrombolysis</i> 2007 Apr;23(2):107-13.                                                                     | 245    | Intervention/Comparators |
| Deftereos S, Tsounis D, Giannopoulos G, Kossyvakis C, Panagopoulou V, Raisakis K, et al. Oral IIa and Xa inhibitors for prevention of stroke in atrial fibrillation: Clinical studies and regulatory considerations. <i>Current Clinical Pharmacology</i> 2012;7(3):166-74.                                 | 572    | Study Design             |
| Deitelzweig S, Amin A, Jing Y, Makenbaeva D, Wiederkehr D, Lin J, et al. Medical cost reductions associated with the usage of novel oral anticoagulants vs warfarin among atrial fibrillation patients, based on the RE-LY, ROCKET-AF, and ARISTOTLE trials. <i>J Med Econ</i> 2012;15(4):776-85.           | 53     | Study Design             |
| Deitelzweig S, Dressler DD, Harte B. Update in hospital medicine: Evidence published in 2011. <i>Annals of Internal Medicine</i> 2012;156(12):875-9.                                                                                                                                                        | 591    | Study Design             |
| Demir K, Can I, Koc F, Vatankulu MA, Ayhan S, Akilli H, et al. Atorvastatin given prior to electrical cardioversion does not affect the recurrence of atrial fibrillation in patients with persistent atrial fibrillation who are on antiarrhythmic therapy. <i>Med Princ Pract</i> 2011;20(5):464-9.       | 97     | Intervention/Comparators |
| Dentali F, Gianni M, Squizzato A, Ageno W, Hylek E, Venco A, et al. Use of statins and recurrence of atrial fibrillation after catheter ablation or electrical cardioversion: A systematic review and a meta-analysis of the literature. <i>Pathophysiology of Haemostasis and Thrombosis</i> 2010;37:A110. | 747    | Intervention/Comparators |
| Denus S, Sanoski CA, Carlsson J, Opolski G, Spinler SA. Rate vs rhythm control in patients with atrial fibrillation: a meta-analysis (Structured abstract). <i>Archives of Internal Medicine</i> 2005;165:258-62.                                                                                           | 1184   | Intervention/Comparators |
| Deplanque D, Leys D, Parnetti L, Schmidt R, Ferro J, Reuck JD, et al. Stroke prevention and atrial fibrillation: Reasons leading to an inappropriate management. Main results of the SAFE II study. <i>British Journal of Clinical Pharmacology</i> 2004;57(6):798-806.                                     | 957    | Study Population         |
| Desai A, Grossberg G. Review of rivastigmine and its clinical applications in Alzheimer's disease and related disorders. <i>Expert Opinion on Pharmacotherapy</i> 2001;2(4):653-66.                                                                                                                         | 1047   | Study Population         |
| Desbiens NA. Deciding on anticoagulating the oldest old with atrial fibrillation: Insights from cost-effectiveness analysis. <i>Journal of the American Geriatrics Society</i> 2002;50(5):863-9.                                                                                                            | 1017   | Study Design             |

| <b>Reference</b>                                                                                                                                                                                                                                                                                                                                                                                                                                  | <b>Ref ID</b> | <b>Reason</b>            |
|---------------------------------------------------------------------------------------------------------------------------------------------------------------------------------------------------------------------------------------------------------------------------------------------------------------------------------------------------------------------------------------------------------------------------------------------------|---------------|--------------------------|
| Deshmukh A, Hilleman DE, Del CM, Nair CK. Antithrombotic Regimens in Patients With Indication for Long-Term Anticoagulation Undergoing Coronary Interventions-Systematic Analysis, Review of Literature, and Implications on Management. <i>Am J Ther</i> 2011 May 4.                                                                                                                                                                             | 107           | Study Design             |
| Design of a multicenter randomized trial for the Stroke Prevention in Atrial Fibrillation Study. The Stroke Prevention in Atrial Fibrillation Investigators. <i>Stroke</i> 1990 Apr;21(4):538-45.                                                                                                                                                                                                                                                 | 500           | Study Design             |
| DeSilvey DL. Clopidogrel plus aspirin vs oral anticoagulation for atrial fibrillation: the ACTIVE W trial. <i>Am J Geriatr Cardiol</i> 2006 Sep;15(5):326-7.                                                                                                                                                                                                                                                                                      | 252           | Intervention/Comparators |
| Dewilde W, Berg JT. Design and rationale of the WOEST trial: What is the Optimal antiplatelet and anticoagulant therapy in patients with oral anticoagulation and coronary Stenting (WOEST). <i>Am Heart J</i> 2009 Nov;158(5):713-8.                                                                                                                                                                                                             | 167           | Study Design             |
| Di Biase L, Burkhardt JD, Mohanty P, Sanchez J, Mohanty S, Horton R, et al. Left atrial appendage: An underrecognized trigger site of atrial fibrillation. <i>Circulation</i> 2010;122(2):109-18.                                                                                                                                                                                                                                                 | 750           | Study Population         |
| Di Minno MN, Russolillo A, Di MA, Camera M, Parolari A, Tremoli E. Direct anticoagulant drugs to overcome limitations of vitamin K antagonists. A critical appraisal of data in atrial fibrillation patients. <i>Expert Opin Emerg Drugs</i> 2013 Mar;18(1):9-23.                                                                                                                                                                                 | 1             | Study Design             |
| Di PG, De CR. [The ARISTOTLE study]. <i>G Ital Cardiol (Rome)</i> 2012 Sep;13(9):557-62.                                                                                                                                                                                                                                                                                                                                                          | 30            | Study Design             |
| Diener HC, Eikelboom J, Connolly SJ, Joyner CD, Hart RG, Lip GY, et al. Apixaban versus aspirin in patients with atrial fibrillation and previous stroke or transient ischaemic attack: a predefined subgroup analysis from AVERROES, a randomised trial. <i>Lancet Neurol</i> 2012 Mar;11(3):225-31.                                                                                                                                             | 64            | Intervention/Comparators |
| Diener HC, Eikelboom J, Granger CB, Hacke W. The king is dead (warfarin): direct thrombin and factor Xa inhibitors: the next Diadochian War? <i>Int J Stroke</i> 2012 Feb;7(2):139-41.                                                                                                                                                                                                                                                            | 67            | Study Design             |
| Diener HC, Grond M, Bohm M, Eckstein HH, Forsting M. Secondary stroke prevention: Recent advances. <i>Deutsches Arzteblatt</i> 2007;104(44):A3016-A3021.                                                                                                                                                                                                                                                                                          | 850           | Study Design             |
| Diener HC, Sacco RL, Yusuf S, Cotton D, Ounpuu S, Lawton WA, et al. Effects of aspirin plus extended-release dipyridamole versus clopidogrel and telmisartan on disability and cognitive function after recurrent stroke in patients with ischaemic stroke in the Prevention Regimen for Effectively Avoiding Second Strokes (PROFESS) trial: a double-blind, active and placebo-controlled study. <i>The Lancet Neurology</i> 2008;7(10):875-84. | 831           | Intervention/Comparators |
| Diener HC. Antiplatelet drugs in secondary prevention of stroke: Lessons from recent trials. <i>Neurology</i> 1997;49(5 SUPPL.):S75-S81.                                                                                                                                                                                                                                                                                                          | 1106          | Study Design             |
| Diener HC. Stroke prevention using the oral direct thrombin inhibitor ximelagatran in patients with non-valvular atrial fibrillation. Pooled analysis from the SPORTIF III and V studies. <i>Cerebrovasc Dis</i> 2006;21(4):279-93.                                                                                                                                                                                                               | 268           | Intervention/Comparators |
| DiMarco JP, Flaker G, Waldo AL, Corley SD, Greene HL, Safford RE, et al. Factors affecting bleeding risk during anticoagulant therapy in patients with atrial fibrillation: observations from the Atrial Fibrillation Follow-up Investigation of Rhythm Management (AFFIRM) study. <i>Am Heart J</i> 2005 Apr;149(4):650-6.                                                                                                                       | 288           | Intervention/Comparators |

| Reference                                                                                                                                                                                                                                                                                                                                          | Ref ID | Reason                   |
|----------------------------------------------------------------------------------------------------------------------------------------------------------------------------------------------------------------------------------------------------------------------------------------------------------------------------------------------------|--------|--------------------------|
| Ding P, Li L, Zhang H, Chen LJ, Deng XJ, Yuan YQ. [Comparison of amiodarone plus irbesartan regimen versus amiodarone alone on maintaining sinus rhythm in rheumatic heart disease patients with persistent atrial fibrillation post valve replacement and cardioversion]. Zhonghua Xin Xue Guan Bing Za Zhi 2009 Jun;37(6):505-8.                 | 164    | Intervention/Comparators |
| Dinh T, Baur LHB, Pisters R, Kamp O, Verheugt FWA, Smeets JLRM, et al. Feasibility of TEE-guided stroke risk assessment in atrial fibrillation-background, aims, design and baseline data of the TIARA pilot study. Netherlands Heart Journal 2011;19(5):214-22.                                                                                   | 691    | Study Design             |
| Disch DL, Greenberg ML, Holzberger PT, Malenka DJ, Birkmeyer JD. Managing chronic atrial fibrillation: a Markov decision analysis comparing warfarin, quinidine, and low-dose amiodarone. Ann Intern Med 1994 Mar 15;120(6):449-57.                                                                                                                | 472    | Intervention/Comparators |
| Dixit S, Gerstenfeld EP, Ratcliffe SJ, Cooper JM, Russo AM, Kimmel SE, et al. Single procedure efficacy of isolating all versus arrhythmogenic pulmonary veins on long-term control of atrial fibrillation: A prospective randomized study. Heart Rhythm 2008;5(2):174-81.                                                                         | 846    | Intervention/Comparators |
| Dolan G, Smith LA, Collins S, Plumb JM. Effect of setting, monitoring intensity and patient experience on anticoagulation control: a systematic review and meta-analysis of the literature (Structured abstract). Current Medical Research and Opinion 2008;24:1459-72.                                                                            | 1181   | Outcomes                 |
| Donnan GA, Ly JV. Should ximelagatran replace warfarin for stroke prevention in patients with atrial fibrillation? Nature Clinical Practice Cardiovascular Medicine 2005;2(6):278-9.                                                                                                                                                               | 924    | Intervention/Comparators |
| Donnan GA. Anticoagulants for atrial fibrillation. Med J Aust 1992 Jul 20;157(2):77-8.                                                                                                                                                                                                                                                             | 487    | Study Design             |
| Douglas M, Strelnick A. Aspirin for atrial fibrillation. J Fam Pract 2000 Jan;49(1):7-8.                                                                                                                                                                                                                                                           | 401    | Study Design             |
| Douketis JD, Arneklev K, Goldhaber SZ, Spandorfer J, Halperin F, Horrow J. Comparison of bleeding in patients with nonvalvular atrial fibrillation treated with ximelagatran or warfarin: assessment of incidence, case-fatality rate, time course and sites of bleeding, and risk factors for bleeding. Arch Intern Med 2006 Apr 24;166(8):853-9. | 264    | Intervention/Comparators |
| Douketis JD, Lane A, Milne J, Ginsberg JS. Accuracy of a portable international normalization ratio monitor in outpatients receiving long-term oral anticoagulant therapy: Comparison with a laboratory reference standard using clinically relevant criteria for agreement. Thrombosis Research 1998;92(1):11-7.                                  | 1096   | Intervention/Comparators |
| Dowd MB, Vavra KA, Witt DM, Delate T, Martinez K. Empiric warfarin dose adjustment with prednisone therapy. A randomized, controlled trial. Journal of Thrombosis and Thrombolysis 2011;31(4):472-7.                                                                                                                                               | 698    | Intervention/Comparators |
| Draskovich CD, O'Dell KM. Dronedarone for Atrial fibrillation: An update of clinical evidence. Formulary 2010;45(9):275-83.                                                                                                                                                                                                                        | 744    | Study Design             |
| Dunkman WB, Johnson GR, Carson PE, Bhat G, Farrell L, Cohn JN. Incidence of thromboembolic events in congestive heart failure. The V-HeFT VA Cooperative Studies Group. Circulation 1993 Jun;87(6 Suppl):VI94-101.                                                                                                                                 | 482    | Study Population         |
| Dunn A. Apixaban reduced stroke and systemic embolism compared with aspirin in adults with AF for whom VKA therapy was unsuitable. Annals of Internal Medicine 2011;154(8):JC4-3.                                                                                                                                                                  | 710    | Study Design             |

| <b>Reference</b>                                                                                                                                                                                                                                                                                       | <b>Ref ID</b> | <b>Reason</b>            |
|--------------------------------------------------------------------------------------------------------------------------------------------------------------------------------------------------------------------------------------------------------------------------------------------------------|---------------|--------------------------|
| Dunn A. Oral anticoagulant therapy safely prevented stroke in older patients with atrial fibrillation. Evidence-Based Medicine 2009;14(5):140.                                                                                                                                                         | 783           | Study Design             |
| Dunn AS, Spyropoulos AC, Turpie AGG. Bridging therapy in patients on long-term oral anticoagulants who require surgery: The Prospective Peri-operative Enoxaparin Cohort Trial (PROSPECT). Journal of Thrombosis and Haemostasis 2007;5(11):2211-8.                                                    | 852           | Study Population         |
| Dyke CM, Jennings LK, Maier G, Andreou C, Daly R, Tamberella MR. Preoperative platelet inhibition with eptifibatid during coronary artery bypass grafting with cardiopulmonary bypass. Journal of Cardiovascular Pharmacology and Therapeutics 2007;12(1):54-60.                                       | 873           | Study Design             |
| Ebell MH. Choosing between warfarin (Coumadin) and aspirin therapy for patients with atrial fibrillation. Am Fam Physician 2005 Jun 15;71(12):2348-50.                                                                                                                                                 | 287           | Study Design             |
| Eckermann S, Coory M, Willan AR. Indirect comparison: relative risk fallacies and odds solution. J Clin Epidemiol 2009 Oct;62(10):1031-6.                                                                                                                                                              | 192           | Study Design             |
| Edds W, Newton W. Preventing stroke in patients with atrial fibrillation. J Fam Pract 2000 Jan;49(1):8-9.                                                                                                                                                                                              | 400           | Study Design             |
| Edoxaban tosylate. American Journal of Cardiovascular Drugs 2011;11(2):129-35.                                                                                                                                                                                                                         | 700           | Study Design             |
| Edvardsson N, Juul-Moller S, Omblus R, Pehrsson K. Effects of low-dose warfarin and aspirin versus no treatment on stroke in a medium-risk patient population with atrial fibrillation. J Intern Med 2003 Jul;254(1):95-101.                                                                           | 336           | Intervention/Comparators |
| Eerenberg ES, Van Es J, Sijpkens MK, Buller HR, Kamphuisen PW. New anticoagulants: Moving on from scientific results to clinical implementation. Annals of Medicine 2011;43(8):606-16.                                                                                                                 | 642           | Study Design             |
| Ehrlich JR, Nattel S. Novel approaches for pharmacological management of atrial fibrillation. Drugs 2009;69(7):757-74.                                                                                                                                                                                 | 798           | Study Design             |
| Eikelboom JW, Connolly SJ, Gao P, Paolasso E, De CR, Husted S, et al. Stroke risk and efficacy of apixaban in atrial fibrillation patients with moderate chronic kidney disease. J Stroke Cerebrovasc Dis 2012 Aug;21(6):429-35.                                                                       | 32            | Intervention/Comparators |
| Eikelboom JW, Hart RG. Antithrombotic therapy for stroke prevention in atrial fibrillation and mechanical heart valves. American Journal of Hematology 2012;87(SUPPL. 1):S100-S107.                                                                                                                    | 600           | Study Design             |
| Eikelboom JW, O'Donnell M, Yusuf S, Diaz R, Flaker G, Hart R, et al. Rationale and design of AVERROES: apixaban versus acetylsalicylic acid to prevent stroke in atrial fibrillation patients who have failed or are unsuitable for vitamin K antagonist treatment. Am Heart J 2010 Mar;159(3):348-53. | 150           | Intervention/Comparators |
| Eikelboom JW, Weitz JI. Idarubicin treatment for venous thromboembolism. The Lancet 2012;379(9811):96-8.                                                                                                                                                                                               | 637           | Study Population         |
| Einecke D. [ASS plus clopidogrel in contraindication for marcumar]. MMW Fortschr Med 2009 Apr 16;151(16):10-1.                                                                                                                                                                                         | 178           | Intervention/Comparators |
| Einecke D. [Stroke prevention in atrial fibrillation. Marcumar alternative in sight]. MMW Fortschr Med 2009 Sep 17;151(38):12-4.                                                                                                                                                                       | 169           | Study Design             |

| <b>Reference</b>                                                                                                                                                                                                                                                                                                                                        | <b>Ref ID</b> | <b>Reason</b>            |
|---------------------------------------------------------------------------------------------------------------------------------------------------------------------------------------------------------------------------------------------------------------------------------------------------------------------------------------------------------|---------------|--------------------------|
| Elder DHJ, Goudie A, Szwejkowski B, Choy A, Struthers A, Lang CC. Warfarin use is associated with increased survival in patients with left ventricular systolic dysfunction and pulmonary hypertension. <i>European Heart Journal</i> 2012;33:168-9.                                                                                                    | 577           | Study Population         |
| Elkind MS, Sacco RL. Direct thrombin inhibition: a novel approach to stroke prevention in patients with atrial fibrillation. <i>Stroke</i> 2004 Jun;35(6):1519-22.                                                                                                                                                                                      | 313           | Study Design             |
| Elliott DJ, Zhao L, Jasper SE, Lieber EA, Klein AL, Weintraub WS. Health status outcomes after cardioversion for atrial fibrillation: results from the Assessment of Cardioversion Using Transesophageal Echocardiography (ACUTE) II Trial. <i>Am Heart J</i> 2008 Aug;156(2):374-6.                                                                    | 201           | Intervention/Comparators |
| Elliott RA, Woodward MC, Osborne CA. Antithrombotic prescribing in atrial fibrillation: application of a prescribing indicator and multidisciplinary feedback to improve prescribing. <i>Age Ageing</i> 2002 Sep;31(5):391-6.                                                                                                                           | 351           | Study Design             |
| Ellis DJ, Usman MH, Milner PG, Canafax DM, Ezekowitz MD. The first evaluation of a novel vitamin K antagonist, tecarfarin (ATI-5923), in patients with atrial fibrillation. <i>Circulation</i> 2009 Sep 22;120(12):1029-35, 2.                                                                                                                          | 171           | Intervention/Comparators |
| El-Omar MM, Dangas G, Mehran R, Lansky AJ, Kipshidze NN, Polena S, et al. Usefulness of atrial fibrillation as a marker of outcome after percutaneous coronary intervention. <i>American Journal of Cardiology</i> 2003;91(2):232-4.                                                                                                                    | 1001          | Study Design             |
| Enajat M, Teerenstra S, van Kuilenburg JT, van Sorge-Greve AH, Albers-Akkers MT, Verheugt FW, et al. Safety of the combination of intensive cholesterol-lowering therapy with oral anticoagulation medication in elderly patients with atrial fibrillation: a randomized, double-blind, placebo-controlled study. <i>Drugs Aging</i> 2009;26(7):585-93. | 179           | Intervention/Comparators |
| Epstein RS, Moyer TP, Aubert RE, Okane DJ, Xia F, Verbrugge RR, et al. Warfarin Genotyping Reduces Hospitalization Rates. Results From the MM-WES (Medco-Mayo Warfarin Effectiveness Study). <i>J Am Coll Cardiol</i> 2010;55(25):2804-12.                                                                                                              | 756           | Intervention/Comparators |
| Eriksson BI, Turpie AGG, Lassen MR, Prins MH, Agnelli G, Kalebo P, et al. Prevention of venous thromboembolism with an oral factor Xa inhibitor, YM150, after total hip arthroplasty. A dose finding study (ONYX-2). <i>Journal of Thrombosis and Haemostasis</i> 2010;8(4):714-21.                                                                     | 767           | Intervention/Comparators |
| Erlich DR. Rivaroxaban (Xarelto) for prevention of thromboembolic events. <i>American Family Physician</i> 2012;86(8):769-70.                                                                                                                                                                                                                           | 551           | Study Design             |
| Espuny JLC. Characteristics of oral anticoagulation treatment in chronic auricular fibrillation. <i>Salud(i)Ciencia</i> 2006;15(1):466-8.                                                                                                                                                                                                               | 886           | Study Design             |
| Essop MR, Nkomo VT. Rheumatic and nonrheumatic valvular heart disease: Epidemiology, management, and prevention in Africa. <i>Circulation</i> 2005;112(23):3584-91.                                                                                                                                                                                     | 906           | Study Population         |
| Estes NAM, Sacco RL, Al-Khatib SM, Ellinor PT, Bezanson J, Alonso A, et al. American Heart Association atrial fibrillation research summit: A conference report from the American Heart Association. <i>Circulation</i> 2011;124(3):363-72.                                                                                                             | 678           | Study Design             |
| Estrogen and progestogen therapy in postmenopausal women. <i>Fertility and Sterility</i> 2008;90(5 SUPPL.):S88-S102.                                                                                                                                                                                                                                    | 828           | Study Population         |

| <b>Reference</b>                                                                                                                                                                                                                                                                                                                                                                       | <b>Ref ID</b> | <b>Reason</b>            |
|----------------------------------------------------------------------------------------------------------------------------------------------------------------------------------------------------------------------------------------------------------------------------------------------------------------------------------------------------------------------------------------|---------------|--------------------------|
| Evans A, Kalra L. Are the results of randomized controlled trials on anticoagulation in patients with atrial fibrillation generalizable to clinical practice? <i>Archives of Internal Medicine</i> 2001;161(11):1443-7.                                                                                                                                                                | 1043          | Study Design             |
| Evans A, Perez I, Yu G, Kalra L. Secondary stroke prevention in atrial fibrillation: lessons from clinical practice. <i>Stroke</i> 2000 Sep;31(9):2106-11.                                                                                                                                                                                                                             | 388           | Study Design             |
| Ezekowitz MD, Bridgers SL, James KE, Carliner NH, Colling CL, Gornick CC, et al. Warfarin in the prevention of stroke associated with nonrheumatic atrial fibrillation. <i>New England Journal of Medicine</i> 1992;327(20):1406-12.                                                                                                                                                   | 1160          | Intervention/Comparators |
| Ezekowitz MD, Bridgers SL, James KE, Carliner NH, Colling CL, Gornick CC, et al. Warfarin in the prevention of stroke associated with nonrheumatic atrial fibrillation. <i>Veterans Affairs Stroke Prevention in Nonrheumatic Atrial Fibrillation Investigators. N Engl J Med</i> 1992 Nov 12;327(20):1406-12.                                                                         | 484           | Intervention/Comparators |
| Ezekowitz MD, Connolly S, Parekh A, Reilly PA, Varrone J, Wang S, et al. Rationale and design of RE-LY: randomized evaluation of long-term anticoagulant therapy, warfarin, compared with dabigatran. <i>Am Heart J</i> 2009 May;157(5):805-10, 810.                                                                                                                                   | 185           | Study Design             |
| Ezekowitz MD, James KE, Nazarian SM, Davenport J, Broderick JP, Gupta SR, et al. Silent cerebral infarction in patients with nonrheumatic atrial fibrillation. <i>Circulation</i> 1995;92(8):2178-82.                                                                                                                                                                                  | 1132          | Intervention/Comparators |
| Ezekowitz MD, James KE, Nazarian SM, Davenport J, Broderick JP, Gupta SR, et al. Silent cerebral infarction in patients with nonrheumatic atrial fibrillation. <i>The Veterans Affairs Stroke Prevention in Nonrheumatic Atrial Fibrillation Investigators. Circulation</i> 1995 Oct 15;92(8):2178-82.                                                                                 | 459           | Intervention/Comparators |
| Ezekowitz MD, James KE, Radford MJ, Rickles FR, Redmond N. Initiating and maintaining patients on warfarin anticoagulation: The importance of monitoring. <i>Journal of Cardiovascular Pharmacology and Therapeutics</i> 1999;4(1):3-8.                                                                                                                                                | 1089          | Intervention/Comparators |
| Ezekowitz MD, Levine JA. Preventing stroke in patients with atrial fibrillation (Structured abstract). <i>JAMA</i> 1999;281:1830-5.                                                                                                                                                                                                                                                    | 1180          | Study Design             |
| Ezekowitz MD, Levine JA. Preventing stroke in patients with atrial fibrillation. <i>JAMA</i> 1999 May 19;281(19):1830-5.                                                                                                                                                                                                                                                               | 426           | Study Design             |
| Ezekowitz MD, Nagarakanti R. Dabigatran in atrial fibrillation: pharmacology and clinical trials. <i>J Interv Card Electrophysiol</i> 2011 Dec;32(3):173-80.                                                                                                                                                                                                                           | 99            | Study Design             |
| Faggiano P, Frattini S, Piovesana P, Lorusso R, Chiari E, Scolari F, et al. Low cerebrovascular event rate in subjects with patent foramen ovale and different clinical presentations: Results from a prospective non randomized study on a population including patients with and without patent foramen ovale closure. <i>International Journal of Cardiology</i> 2012;156(1):47-52. | 607           | Study Population         |
| Falk RH, DeCara JM. Dofetilide: A new pure class III antiarrhythmic agent. <i>American Heart Journal</i> 2000;140(5):697-706.                                                                                                                                                                                                                                                          | 1061          | Intervention/Comparators |
| Fang MC, Go AS, Hylek EM, Chang Y, Henault LE, Jensvold NG, et al. Age and the risk of warfarin-associated hemorrhage: the anticoagulation and risk factors in atrial fibrillation study. <i>J Am Geriatr Soc</i> 2006 Aug;54(8):1231-6.                                                                                                                                               | 253           | Study Design             |



| <b>Reference</b>                                                                                                                                                                                                                                                                   | <b>Ref ID</b> | <b>Reason</b>            |
|------------------------------------------------------------------------------------------------------------------------------------------------------------------------------------------------------------------------------------------------------------------------------------|---------------|--------------------------|
| Fasey N, Brennan PJ, Meade TW. Thrombosis prevention trial: follow-up study of practical implications. <i>Br J Gen Pract</i> 2002 Mar;52(476):208-9.                                                                                                                               | 362           | Study Design             |
| Fatkin D, Kelly RP, Feneley MP. Relations between left atrial appendage blood flow velocity, spontaneous echocardiographic contrast and thromboembolic risk in vivo. <i>J Am Coll Cardiol</i> 1994;23(4):961-9.                                                                    | 1151          | Study Design             |
| Feinberg WM, Cornell ES, Nightingale SD, Pearce LA, Tracy RP, Hart RG, et al. Relationship between prothrombin activation fragment F1.2 and international normalized ratio in patients with atrial fibrillation. <i>Stroke</i> 1997;28(6):1101-6.                                  | 1110          | Study Design             |
| Feinberg WM, Macy E, Cornell ES, Nightingale SD, Pearce LA, Tracy RP, et al. Plasmin-alpha2-antiplasmin complex in patients with atrial fibrillation. <i>Stroke Prevention in Atrial Fibrillation Investigators. Thromb Haemost</i> 1999 Jul;82(1):100-3.                          | 422           | Study Design             |
| Feldman T, Mauri L, Kar S, Rinaldi M, Fail P, Hermiller J, et al. EVEREST II Randomized Clinical Trial: A critical assessment of the safety data in patients treated with the MitraClip. <i>J Am Coll Cardiol</i> 2010;56(13):B23.                                                 | 738           | Intervention/Comparators |
| Ferri C. Atrial fibrillation: From upstream therapy to antiarrhythmic therapy. <i>High Blood Pressure and Cardiovascular Prevention</i> 2011;18(2):86.                                                                                                                             | 683           | Study Design             |
| Field TS, Tjia J, Mazor KM, Donovan JL, Kanaan AO, Harrold LR, et al. Randomized trial of a warfarin communication protocol for nursing homes: An SBAR-based approach. <i>American Journal of Medicine</i> 2011;124(2):179.                                                        | 716           | Intervention/Comparators |
| Fihn SD, McDonnell MB, Vermes D, Henikoff JG, Martin DC, Callahan CM, et al. A computerized intervention to improve timing of outpatient follow-up: A multicenter randomized trial in patients treated with warfarin. <i>Journal of General Internal Medicine</i> 1994;9(3):131-9. | 1150          | Intervention/Comparators |
| Fiore L, Brophy M, Peduzzi P, Lu D, Sacco J, Colling C, et al. Combination hemotherapy and mortality prevention (CHAMP) study rationale and design. <i>Journal of Thrombosis and Thrombolysis</i> 1998;6(2):133-40.                                                                | 1094          | Study Design             |
| Fisher M, Moonis M, Fisher M. Considering the role of heparin and low-molecular-weight heparins in acute ischemic stroke. <i>Stroke</i> 2002;33(7):1927-33.                                                                                                                        | 1010          | Intervention/Comparators |
| Fitzmaurice DA, Hobbs FDR, Rose PE, Murray ET. A randomised controlled trial of community versus secondary care management of atrial fibrillation thromboprophylaxis with warfarin. <i>European Heart Journal</i> 1998;19 (Abstract Suppl):154.                                    | 1193          | Intervention/Comparators |
| Fitzmaurice DA, Murray ET, McCahon D, Holder R, Raftery JP, Hussain S, et al. Self management of oral anticoagulation: Randomised trial. <i>British Medical Journal</i> 2005;331(7524):1057-9.                                                                                     | 908           | Intervention/Comparators |
| Fitzpatrick AP, Earley M, Petkar S, Diab I, Fox D, Williams P. Practical management of common atrial arrhythmias 1: Cardioversion. <i>British Journal of Hospital Medicine</i> 2007;68(3):122-5.                                                                                   | 871           | Study Design             |
| Flaherty ML. Anticoagulant-associated intracerebral hemorrhage. <i>Seminars in Neurology</i> 2010;30(5):565-72.                                                                                                                                                                    | 728           | Study Design             |
| Flaker GC, Blackshear JL, McBride R, Kronmal RA, Halperin JL, Hart RG. Antiarrhythmic drug therapy and cardiac mortality in atrial fibrillation. <i>The Stroke Prevention in Atrial Fibrillation Investigators. J Am Coll Cardiol</i> 1992 Sep;20(3):527-32.                       | 486           | Intervention/Comparators |

| Reference                                                                                                                                                                                                                                                                                                                                                                                                                   | Ref ID | Reason                   |
|-----------------------------------------------------------------------------------------------------------------------------------------------------------------------------------------------------------------------------------------------------------------------------------------------------------------------------------------------------------------------------------------------------------------------------|--------|--------------------------|
| Flaker GC, Eikelboom JW, Shestakovska O, Connolly SJ, Kaatz S, Budaj A, et al. Bleeding during treatment with aspirin versus apixaban in patients with atrial fibrillation unsuitable for warfarin: the apixaban versus acetylsalicylic acid to prevent stroke in atrial fibrillation patients who have failed or are unsuitable for vitamin K antagonist treatment (AVERROES) trial. <i>Stroke</i> 2012 Dec;43(12):3291-7. | 22     | Intervention/Comparators |
| Flaker GC, Gruber M, Connolly SJ, Goldman S, Chaparro S, Vahanian A, et al. Risks and benefits of combining aspirin with anticoagulant therapy in patients with atrial fibrillation: an exploratory analysis of stroke prevention using an oral thrombin inhibitor in atrial fibrillation (SPORTIF) trials. <i>Am Heart J</i> 2006 Nov;152(5):967-73.                                                                       | 251    | Intervention/Comparators |
| Fletcher K, Mant J, Roalfe A, Hobbs FD. Impact of study design on recruitment of patients to a primary care trial: an observational time series analysis of the Birmingham Atrial Fibrillation Treatment of the Aged (BAFTA) study. <i>Fam Pract</i> 2010 Dec;27(6):691-7.                                                                                                                                                  | 144    | Study Design             |
| Ford GA, Choy AM, Deedwania P, Karalis DG, Lindholm CJ, Pluta W, et al. Direct thrombin inhibition and stroke prevention in elderly patients with atrial fibrillation: experience from the SPORTIF III and V Trials. <i>Stroke</i> 2007 Nov;38(11):2965-71.                                                                                                                                                                 | 219    | Intervention/Comparators |
| Fornaro G, Rossi P, Mantica PG, Caccia ME, Aralda D, Lavezzari M, et al. Indobufen in the prevention of thromboembolic complications in patients with heart disease: A randomized, placebo-controlled, double-blind study. <i>Circulation</i> 1993;87(1):162-4.                                                                                                                                                             | 1159   | Intervention/Comparators |
| Fountain RB, Holmes DR, Chandrasekaran K, Packer D, Asirvatham S, Van Tassel R, et al. The PROTECT AF (WATCHMAN Left Atrial Appendage System for Embolic PROTECTION in Patients with Atrial Fibrillation) Trial. <i>American Heart Journal</i> 2006;151(5):956-61.                                                                                                                                                          | 893    | Intervention/Comparators |
| Frantz E. [What anticoagulant therapy should be used for what form of atrial fibrillation?]. <i>Dtsch Med Wochenschr</i> 2000 Apr 20;125 Suppl 1:S10-S11.                                                                                                                                                                                                                                                                   | 393    | Study Design             |
| Fricker J. Five studies from HOT LINE I, European Society of cardiology congress 2011, Paris. <i>European Heart Journal</i> 2011;32(21):2595-7.                                                                                                                                                                                                                                                                             | 657    | Study Design             |
| Friedman PA, Ip JH, Jazayeri M, Lobban JH, Olshansky B, Zhou D, et al. The Impact of Atrial Prevention and Termination Therapies on Atrial Tachyarrhythmia Burden in Patients Receiving a Dual-Chamber Defibrillator for Ventricular Arrhythmias. <i>Journal of Interventional Cardiac Electrophysiology</i> 2004;10(2):103-10.                                                                                             | 962    | Study Population         |
| From the american heart association 2010 scientific sessions: Rivaroxaban comparable to warfarin in stroke prevention. <i>Formulary</i> 2010;45(11):361.                                                                                                                                                                                                                                                                    | 729    | Study Design             |
| Frost L, Johnsen SP, Pedersen L, Toft E, Husted S, Sorensen HT. Atrial fibrillation or flutter and stroke: a Danish population-based study of the effectiveness of oral anticoagulation in clinical practice. <i>J Intern Med</i> 2002 Jul;252(1):64-9.                                                                                                                                                                     | 361    | Study Design             |
| Fukunami M. Frontiers in prevention of thromboembolism in nonvalvular atrial fibrillation. <i>Journal of Cardiology</i> 1999;33(SUPPL. 1):65-70.                                                                                                                                                                                                                                                                            | 1088   | Study Design             |
| Furlan AJ, Reisman M, Massaro J, Mauri L, Adams H, Albers GW, et al. Closure or medical therapy for cryptogenic stroke with patent foramen ovale. <i>New England Journal of Medicine</i> 2012;366(11):991-9.                                                                                                                                                                                                                | 620    | Study Population         |

| Reference                                                                                                                                                                                                                                                                                      | Ref ID | Reason                   |
|------------------------------------------------------------------------------------------------------------------------------------------------------------------------------------------------------------------------------------------------------------------------------------------------|--------|--------------------------|
| Furtner M. Prevention of stroke and cognitive vascular impairment. <i>Journal of the Neurological Sciences</i> 2009;283(1-2):276.                                                                                                                                                              | 786    | Study Design             |
| Gage BF, Cardinalli AB, Albers GW, Owens DK. Cost-effectiveness of warfarin and aspirin for prophylaxis of stroke in patients with nonvalvular atrial fibrillation. <i>JAMA</i> 1995 Dec 20;274(23):1839-45.                                                                                   | 457    | Study Design             |
| Gage BF, Cardinalli AB, Owens DK. The effect of stroke and stroke prophylaxis with aspirin or warfarin on quality of life. <i>Arch Intern Med</i> 1996 Sep 9;156(16):1829-36.                                                                                                                  | 447    | Study Design             |
| Gage BF, van WC, Pearce L, Hart RG, Koudstaal PJ, Boode BS, et al. Selecting patients with atrial fibrillation for anticoagulation: stroke risk stratification in patients taking aspirin. <i>Circulation</i> 2004 Oct 19;110(16):2287-92.                                                     | 306    | Study Design             |
| Gallagher AM, Setakis E, Plumb JM, Clemens A, van Staa TP. Risks of stroke and mortality associated with suboptimal anticoagulation in atrial fibrillation patients. <i>Thrombosis and Haemostasis</i> 2011;106(5):968-77.                                                                     | 654    | Study Design             |
| Gallagher PF, O'Connor MN, O'mahony D. Prevention of potentially inappropriate prescribing for elderly patients: A randomized controlled trial using STOPP/START criteria. <i>Clinical Pharmacology and Therapeutics</i> 2011;89(6):845-54.                                                    | 690    | Study Population         |
| Ganjehei L, Wilson JM. Anticoagulants for stroke prevention in nonvalvular atrial fibrillation: New agents and an updated understanding. <i>Texas Heart Institute Journal</i> 2012;39(4):517-25.                                                                                               | 579    | Study Design             |
| Ganz DA, Lamas GA, Orav EJ, Goldman L, Gutierrez PR, Mangione CM. Age-related differences in management of heart disease: a study of cardiac medication use in an older cohort. <i>Pacemaker Selection in the Elderly (PASE) Investigators. J Am Geriatr Soc</i> 1999 Feb;47(2):145-50.        | 429    | Intervention/Comparators |
| Gao F, Zhou YJ, Wang ZJ, Yang SW, Nie B, Liu XL, et al. Meta-analysis of the combination of warfarin and dual antiplatelet therapy after coronary stenting in patients with indications for chronic oral anticoagulation. <i>International Journal of Cardiology</i> 2011;148(1):96-101.       | 703    | Intervention/Comparators |
| Garcia-Honrubia A, Roldan V, Climent V, Sogorb F, Marin F. Antiplatelet versus anticoagulant therapies in advanced age: An unfinished task. <i>International Journal of Cardiology</i> 2006;110(2):271-2.                                                                                      | 889    | Study Design             |
| Garcia-Lizana FR, Sarria-Santamera A, Gol-Freixa J. [Anticoagulants for patients with chronic auricular fibrillation: when are they indicated?]. <i>Aten Primaria</i> 2004 Oct 31;34(7):374-8.                                                                                                 | 303    | Study Design             |
| Garnock-Jones KP. Dabigatran etexilate: a review of its use in the prevention of stroke and systemic embolism in patients with atrial fibrillation. <i>Am J Cardiovasc Drugs</i> 2011;11(1):57-72.                                                                                             | 120    | Study Design             |
| Garnock-Jones KP. Spotlight on dabigatran etexilate in the prevention of stroke and systemic embolism in patients with atrial fibrillation. <i>Drugs and Aging</i> 2011;28(5):415-9.                                                                                                           | 692    | Study Design             |
| Garrett AD. Outpatient treatment of pulmonary embolism safe for low-risk patients. <i>Drug Topics</i> 2011;155(9):40.                                                                                                                                                                          | 672    | Study Population         |
| Gattellari M, Worthington J, Blacker D, Leung D. Delivering stroke prevention for patients with atrial fibrillation: A cluster randomised controlled trial in a primary health care setting-results from the stop-stroke in AF expert panel. <i>International Journal of Stroke</i> 2010;5:30. | 741    | Study Population         |

| <b>Reference</b>                                                                                                                                                                                                                                                                                                    | <b>Ref ID</b> | <b>Reason</b>            |
|---------------------------------------------------------------------------------------------------------------------------------------------------------------------------------------------------------------------------------------------------------------------------------------------------------------------|---------------|--------------------------|
| Gattellari M, Worthington JM, Leung DY, Zwar N. Supporting Treatment decision making to Optimise the Prevention of STROKE in Atrial Fibrillation: the STOP STROKE in AF study. Protocol for a cluster randomised controlled trial. <i>Implement Sci</i> 2012;7:63.                                                  | 37            | Intervention/Comparators |
| Gattellari M, Worthington JM, Zwar NA, Middleton S. The management of non-valvular atrial fibrillation (NVAf) in Australian general practice: bridging the evidence-practice gap. A national, representative postal survey. <i>BMC Fam Pract</i> 2008;9:62.                                                         | 196           | Study Design             |
| Gebuis EPA, Rosendaal FR, van Meegen E, van der Meer FJM. Vitamin K1 supplementation to improve the stability of anticoagulation therapy with vitamin K antagonists: A dose-finding study. <i>Haematologica</i> 2011;96(4):583-9.                                                                                   | 705           | Intervention/Comparators |
| Geeganage CM, Gray LJ, England TJ, Sare GM, Bath PMW. Relationship between baseline haemodynamics measures and early outcome after stroke: Data from the tinzaparin in acute ischaemic stroke trial (TAIST). <i>Cerebrovascular Diseases</i> 2009;27:76.                                                            | 804           | Intervention/Comparators |
| Gershlick AH. Treating the non-electrical risks of atrial fibrillation. <i>European Heart Journal</i> 1997;18(SUPPL. C):C19-C26.                                                                                                                                                                                    | 1112          | Study Design             |
| Ghanbari H, Phard WS, Al-Ameri H, Latchamsetty R, Jongnarngsin K, Crawford T, et al. Meta-analysis of safety and efficacy of uninterrupted warfarin compared to Heparin-based bridging therapy during implantation of cardiac rhythm devices. <i>American Journal of Cardiology</i> 2012;110(10):1482-8.            | 537           | Intervention/Comparators |
| Ghani KR, Anson KM, Camm AJ. Atrial fibrillation and the urologist. <i>BJU International</i> 2004;94(3):254-5.                                                                                                                                                                                                      | 951           | Study Design             |
| Gibson CM. Long-term anticoagulation in cardiovascular indications. <i>European Journal of Haematology</i> 2010;85(SUPPL. 72):20-8.                                                                                                                                                                                 | 751           | Study Design             |
| Gillinov AM, Argenziano M, Blackstone EH, Iribarne A, Derose Jr JJ, Ailawadi G, et al. Designing comparative effectiveness trials of surgical ablation for atrial fibrillation: Experience of the Cardiothoracic Surgical Trials Network. <i>Journal of Thoracic and Cardiovascular Surgery</i> 2011;142(2):257-64. | 675           | Study Design             |
| Gillis AM, Skanes AC. Comparing the 2010 North American and European atrial fibrillation guidelines. <i>Can J Cardiol</i> 2011 Jan;27(1):7-13.                                                                                                                                                                      | 117           | Study Design             |
| Giralt D, Domingues-Montanari S, Mendioroz M, Ortega L, Maisterra O, Perea-Gainza M, et al. The gender gap in stroke: A meta-analysis. <i>Acta Neurologica Scandinavica</i> 2012;125(2):83-90.                                                                                                                      | 636           | Study Design             |
| Giuliano V, Bassotti G, Mourvaki E, Castellani D, Filippucci E, Sabatino G, et al. Small intestinal bacterial overgrowth and warfarin dose requirement variability. <i>Thrombosis Research</i> 2010;126(1):12-7.                                                                                                    | 753           | Intervention/Comparators |
| Gjesdal K, Feyzi J, Olsson SB. Digitalis: a dangerous drug in atrial fibrillation? An analysis of the SPORTIF III and V data. <i>Heart</i> 2008 Feb;94(2):191-6.                                                                                                                                                    | 233           | Intervention/Comparators |
| Go AS, Hylek EM, Chang Y, Phillips KA, Henault LE, Capra AM, et al. Anticoagulation therapy for stroke prevention in atrial fibrillation: how well do randomized trials translate into clinical practice? <i>JAMA</i> 2003 Nov 26;290(20):2685-92.                                                                  | 327           | Intervention/Comparators |

| <b>Reference</b>                                                                                                                                                                                                                                                                                                                                                 | <b>Ref ID</b> | <b>Reason</b>            |
|------------------------------------------------------------------------------------------------------------------------------------------------------------------------------------------------------------------------------------------------------------------------------------------------------------------------------------------------------------------|---------------|--------------------------|
| Goktekin O, Melek M, Timuralp B, Ata N, Kudaiberdieva G, Gorenek B, et al. Internal cardioversion of atrial fibrillation under transesophageal echocardiography guidance without fluoroscopy using single-lead catheter technique. <i>American Journal of Cardiology</i> 2002;90(3):328-31.                                                                      | 1012          | Intervention/Comparators |
| Gokterin O, Uzener N, Ata N, Kudaiberdieva G, Gucuyener D, Ozdemir G, et al. Does short-term anticoagulation with heparin increase risk for microemboli patients undergoing transesophageal guided electrical cardioversion for atrial fibrillation? A transcranial Doppler ultrasonography study. <i>International Journal of Cardiology</i> 2003;88(1):107-12. | 997           | Intervention/Comparators |
| Goldenberg NA, Krantz MJ, Hiatt WR. L-Carnitine plus cilostazol versus cilostazol alone for the treatment of claudication in patients with peripheral artery disease: A multicenter, randomized, double-blind, placebo-controlled trial. <i>Vascular Medicine (United Kingdom)</i> 2012;17(3):145-54.                                                            | 596           | Study Population         |
| Goldman ME, Pearce LA, Hart RG, Zabalgoitia M, Asinger RW, Safford R, et al. Pathophysiologic correlates of thromboembolism in nonvalvular atrial fibrillation: I. Reduced flow velocity in the left atrial appendage (The Stroke Prevention in Atrial Fibrillation [SPAF-III] study). <i>J Am Soc Echocardiogr</i> 1999 Dec;12(12):1080-7.                      | 410           | Study Design             |
| Golzari H, Cebul RD, Bahler RC. Atrial fibrillation: restoration and maintenance of sinus rhythm and indications for anticoagulation therapy (Structured abstract). <i>Annals of Internal Medicine</i> 1996;125:311-23.                                                                                                                                          | 1183          | Study Design             |
| Gomberg-Maitland M, Wenger NK, Feyzi J, Lengyel M, Volgman AS, Petersen P, et al. Anticoagulation in women with non-valvular atrial fibrillation in the stroke prevention using an oral thrombin inhibitor (SPORTIF) trials. <i>Eur Heart J</i> 2006 Aug;27(16):1947-53.                                                                                         | 258           | Intervention/Comparators |
| Gong IY, Tirona RG, Schwarz UI, Crown N, Dresser GK, Larue S, et al. Prospective evaluation of a pharmacogenetics-guided warfarin loading and maintenance dose regimen for initiation of therapy. <i>Blood</i> 2011 Sep 15;118(11):3163-71.                                                                                                                      | 98            | Intervention/Comparators |
| Gore JM, Dalen JE. Cardiovascular disease. <i>Journal of the American Medical Association</i> 1996;275(23):1797-8.                                                                                                                                                                                                                                               | 1122          | Study Design             |
| Gorelick PB, Sacco RL, Smith DB. Review: 6 Clinical conditions can be modified to reduce risk for a first stroke. <i>Evidence-Based Medicine</i> 1999;4(5):142-3.                                                                                                                                                                                                | 1083          | Study Design             |
| Goto S. The frontiers of antithrombotic clinical trials: A review of the latest findings from ACC 2010. <i>Therapeutic Research</i> 2010;31(7):917-24.                                                                                                                                                                                                           | 739           | Study Design             |
| Gottlieb LK, Salem-Schatz S. Anticoagulation in atrial fibrillation: Does efficacy in clinical trials translate into effectiveness in practice? <i>Archives of Internal Medicine</i> 1994;154(17):1945-53.                                                                                                                                                       | 1143          | Study Design             |
| Goyal A, Tricoci P, Melloni C, Mills JS, Thomas KL, Adams GL, et al. Highlights from the American Heart Association Scientific Sessions, November 13 to 16, 2005, Dallas, TX. <i>American Heart Journal</i> 2006;151(2):295-307.                                                                                                                                 | 900           | Study Design             |
| Graff J, Harder S. Anticoagulant Therapy with the Oral Direct Factor Xa Inhibitors Rivaroxaban, Apixaban and Edoxaban and the Thrombin Inhibitor Dabigatran Etexilate in Patients with Hepatic Impairment. <i>Clin Pharmacokinet</i> 2013 Feb 7.                                                                                                                 | 5             | Study Design             |
| Greenspon AJ, Hart RG, Dawson D, Hellkamp AS, Silver M, Flaker GC, et al. Predictors of stroke in patients paced for sick sinus syndrome. <i>J Am Coll Cardiol</i> 2004 May 5;43(9):1617-22.                                                                                                                                                                     | 316           | Study Population         |

| Reference                                                                                                                                                                                                                                                                            | Ref ID | Reason                   |
|--------------------------------------------------------------------------------------------------------------------------------------------------------------------------------------------------------------------------------------------------------------------------------------|--------|--------------------------|
| Gribbin GM, Kenny RA, McCue P, Toff WD, Bexton RS, McComb JM. Individualised quality of life after pacing. Does mode matter? <i>Europace</i> 2004;6(6):552-60.                                                                                                                       | 941    | Study Design             |
| Griffin BL, Burkiewicz JS, Peppers LR, Warholak TL. International Normalized Ratio values in group versus individual appointments in a pharmacist-managed anticoagulation clinic. <i>American Journal of Health-System Pharmacy</i> 2009;66(13):1218-23.                             | 795    | Intervention/Comparators |
| Grip LT, Giugliano RP. Importance of dose selection in novel oral anticoagulants for atrial fibrillation. <i>Archivos de Cardiologia de Mexico</i> 2012;82(4):308-11.                                                                                                                | 554    | Study Design             |
| Gronefeld GC, Wegener F, Israel CW, Teupe C, Hohnloser SH. Thromboembolic risk of patients referred for radiofrequency catheter ablation of typical atrial flutter without prior appropriate anticoagulation therapy. <i>Pacing Clin Electrophysiol</i> 2003 Jan;26(1 Pt 2):323-7.   | 341    | Intervention/Comparators |
| Gross B, Lampl Y. Anticoagulation for stroke prevention. <i>Israel Medical Association Journal</i> 2006;8(11):779-83.                                                                                                                                                                | 885    | Study Design             |
| Grunau BE, Wiens MO, Harder KK. Patient self-management of warfarin therapy: pragmatic feasibility study in Canadian primary care. <i>Can Fam Physician</i> 2011 Aug;57(8):e292-e298.                                                                                                | 91     | Intervention/Comparators |
| Guest JF, Watson HG, Limaye S. Modeling the cost-effectiveness of prothrombin complex concentrate compared with fresh frozen plasma in emergency warfarin reversal in the United Kingdom. <i>Clin Ther</i> 2010 Dec;32(14):2478-93.                                                  | 116    | Study Design             |
| Gullov AL, Koefoed BG, Petersen P. Bleeding during warfarin and aspirin therapy in patients with atrial fibrillation: The AFASAK 2 Study. <i>Archives of Internal Medicine</i> 1999;159(12):1322-8.                                                                                  | 1086   | Study Design             |
| Gunaydin S, McCusker K, Vijay V, Isbir S, Sari T, Onur MA, et al. Comparison of polymethoxyethylacrylate-coated circuits with leukocyte filtration and reduced heparinization protocol on heparin-bonded circuits in different risk cohorts. <i>Perfusion</i> 2006 Nov;21(6):329-42. | 237    | Intervention/Comparators |
| Guo Y, Lip GYH, Apostolakis S. Bleeding risk assessment and management in atrial fibrillation patients: Key messages for clinical practice from the European Heart Rhythm Association position statement. <i>Polskie Archiwum Medycyny Wewnetrznej</i> 2012;122(5):235-42.           | 583    | Study Design             |
| Gurbel P. Aspirin - Scope and limitations. <i>British Journal of Cardiology</i> 2010;17(SUPPL. 1):S8-S9.                                                                                                                                                                             | 769    | Study Design             |
| Guthmann RA. Which patients with atrial fibrillation do not need anticoagulation therapy with warfarin? <i>Am Fam Physician</i> 2004 Sep 1;70(5):917-8.                                                                                                                              | 307    | Study Design             |
| Gutierrez C, Blanchard DG. Atrial fibrillation: Diagnosis and treatment. <i>American Family Physician</i> 2011;83(1):61-8.                                                                                                                                                           | 722    | Study Design             |
| Haas S, Schellong S. New anticoagulants: From bench to bedside. <i>Hamostaseologie</i> 2007;27(1):41-7.                                                                                                                                                                              | 874    | Study Design             |
| Hadjinikolaou L, Boehm MC, Ganner C, Kendall SW, Rosin MD, Goldsmith IR, et al. Aspire porcine bioprosthesis: Ten years' experience. <i>Journal of Heart Valve Disease</i> 2005;14(1):47-53.                                                                                         | 905    | Study Design             |
| Halkes PH, van GJ, Kappelle LJ, Koudstaal PJ, Algra A. Medium intensity oral anticoagulants versus aspirin after cerebral ischaemia of arterial origin (ESPRIT): a randomised controlled trial. <i>Lancet Neurol</i> 2007 Feb;6(2):115-24.                                           | 242    | Study Population         |

| Reference                                                                                                                                                                                                                                                                                                                                                                      | Ref ID | Reason                   |
|--------------------------------------------------------------------------------------------------------------------------------------------------------------------------------------------------------------------------------------------------------------------------------------------------------------------------------------------------------------------------------|--------|--------------------------|
| Halperin JL. Ximelagatran compared with warfarin for prevention of thromboembolism in patients with nonvalvular atrial fibrillation: Rationale, objectives, and design of a pair of clinical studies and baseline patient characteristics (SPORTIF III and V). <i>Am Heart J</i> 2003 Sep;146(3):431-8.                                                                        | 330    | Intervention/Comparators |
| Halperin JL. Ximelagatran: oral direct thrombin inhibition as anticoagulant therapy in atrial fibrillation. <i>J Am Coll Cardiol</i> 2005 Jan 4;45(1):1-9.                                                                                                                                                                                                                     | 298    | Intervention/Comparators |
| Hamann GF, Rother J. Secondary Stroke Prevention - an Update. <i>Fortschritte der Neurologie Psychiatrie</i> 2010;78(10):572-81.                                                                                                                                                                                                                                               | 733    | Study Design             |
| Han ZX, Ma GY, Ma CM. [Prevention of embolism due to chronic auricular fibrillation with persantin (dipyridamole) combined with aspirin]. <i>Zhongguo Wei Zhong Bing Ji Jiu Yi Xue</i> 2007 Apr;19(4):250.                                                                                                                                                                     | 234    | Intervention/Comparators |
| Handjani AM, Khosropanah S, Habibzadeh F. Safety and antithrombotic effects of fixed low-dose warfarin-aspirin combination in rheumatic mitral stenosis associated with atrial fibrillation. <i>Iranian Journal of Medical Sciences</i> 1995;20(3-4):93-5.                                                                                                                     | 1130   | Study Population         |
| Handschin AE, Trentz O, Kock HJ, Wanner GA. Low molecular weight heparin-induced skin necrosis - A systematic review. <i>Langenbeck's Archives of Surgery</i> 2005;390(3):249-54.                                                                                                                                                                                              | 925    | Intervention/Comparators |
| Hankey GJ. At last, a RE-LYable alternative to warfarin for atrial fibrillation. <i>Int J Stroke</i> 2009 Dec;4(6):454-5.                                                                                                                                                                                                                                                      | 163    | Study Design             |
| Hanley D, Gorelick PB, Elliott WJ, Broder MS, Saver JL, Kidwell CS, et al. Determining the appropriateness of selected surgical and medical management options in recurrent stroke prevention: a guideline for primary care physicians from the National Stroke Association work group on recurrent stroke prevention. <i>J Stroke Cerebrovasc Dis</i> 2004 Sep;13(5):196-207. | 218    | Study Design             |
| Hannon N, Tan KM, Noone I, Ni Chroinin D, O'Donnell M, Audebert HJ, et al. Therapeutic INR promotes survival and reduces disability in Atrial fibrillation and stroke - A meta-analysis. <i>Cerebrovascular Diseases</i> 2011;31:183.                                                                                                                                          | 699    | Study Design             |
| Hannon N, Tan KM, Noone I, O'Donnell M, Chroinin DN, Audebert HJ, et al. Association between therapeutic INR, survival and reduced disability in atrial fibrillation and stroke-systematic review and meta-analysis. <i>Irish Journal of Medical Science</i> 2011;180:S328-S329.                                                                                               | 669    | Study Design             |
| Harenberg J, Huhle G, Piazzolo L, Giese C, Heene DL. Long-term anticoagulation of outpatients with adverse events to oral anticoagulants using low-molecular-weight heparin. <i>Semin Thromb Hemost</i> 1997;23(2):167-72.                                                                                                                                                     | 445    | Intervention/Comparators |
| Harrison CN, Campbell PJ, Buck G, Wheatley K, East CL, Bareford D, et al. Hydroxyurea compared with anagrelide in high-risk essential thrombocythemia. <i>New England Journal of Medicine</i> 2005;353(1):33-45.                                                                                                                                                               | 920    | Study Population         |
| Hart RG, Benavente O, McBride R, Pearce LA. Antithrombotic therapy to prevent stroke in patients with atrial fibrillation: a meta-analysis (Brief record). <i>Annals of Internal Medicine</i> 1999;131:492-501.                                                                                                                                                                | 1176   | Study Design             |
| Hart RG, Bhatt DL, Hacke W, Fox KAA, Hankey GJ, Berger PB, et al. Clopidogrel and aspirin versus aspirin alone for the prevention of stroke in patients with a history of atrial fibrillation: Subgroup analysis of the CHARISMA randomized trial. <i>Cerebrovascular Diseases</i> 2008;25(4):344-7.                                                                           | 841    | Intervention/Comparators |

| <b>Reference</b>                                                                                                                                                                                                                                                                                                        | <b>Ref ID</b> | <b>Reason</b>            |
|-------------------------------------------------------------------------------------------------------------------------------------------------------------------------------------------------------------------------------------------------------------------------------------------------------------------------|---------------|--------------------------|
| Hart RG, Leonard AD, Talbert RL, Pearce LA, Cornell E, Bovill E, et al. Aspirin dosage and thromboxane synthesis in patients with vascular disease. <i>Pharmacotherapy</i> 2003;23(5):579-84.                                                                                                                           | 995           | Study Design             |
| Hart RG, Pearce LA, Asinger RW, Herzog CA. Warfarin in atrial fibrillation patients with moderate chronic kidney disease. <i>Clin J Am Soc Nephrol</i> 2011 Nov;6(11):2599-604.                                                                                                                                         | 83            | Study Population         |
| Hart RG, Pearce LA, Koudstaal PJ. Transient ischemic attacks in patients with atrial fibrillation: implications for secondary prevention: the European Atrial Fibrillation Trial and Stroke Prevention in Atrial Fibrillation III trial. <i>Stroke</i> 2004 Apr;35(4):948-51.                                           | 322           | Intervention/Comparators |
| Hart RG, Pearce LA, McBride R, Rothbart RM, Asinger RW. Factors associated with ischemic stroke during aspirin therapy in atrial fibrillation: Analysis of 2012 participants in the SPAF I-III clinical trials. <i>Stroke</i> 1999;30(6):1223-9.                                                                        | 1087          | Intervention/Comparators |
| Hart RG, Pearce LA, McBride R, Rothbart RM, Asinger RW. Factors associated with ischemic stroke during aspirin therapy in atrial fibrillation: analysis of 2012 participants in the SPAF I-III clinical trials. The Stroke Prevention in Atrial Fibrillation (SPAF) Investigators. <i>Stroke</i> 1999 Jun;30(6):1223-9. | 425           | Study Design             |
| Hart RG, Pearce LA, Miller VT, Anderson DC, Rothrock JF, Albers GW, et al. Cardioembolic vs. noncardioembolic strokes in atrial fibrillation: frequency and effect of antithrombotic agents in the stroke prevention in atrial fibrillation studies. <i>Cerebrovasc Dis</i> 2000 Jan;10(1):39-43.                       | 406           | Outcomes                 |
| Hart RG, Pearce LA, Rothbart RM, McAnulty JH, Asinger RW, Halperin JL. Stroke with intermittent atrial fibrillation: incidence and predictors during aspirin therapy. <i>Stroke Prevention in Atrial Fibrillation Investigators. J Am Coll Cardiol</i> 2000 Jan;35(1):183-7.                                            | 404           | Study Population         |
| Hart RG. The unmet need of patients with atrial fibrillation: AVERROES and the novel oral anticoagulants. <i>Int J Stroke</i> 2011 Jun;6(3):207-8.                                                                                                                                                                      | 105           | Intervention/Comparators |
| Hatala R, Hlivak P, Urban L, Chroust K. Thromboembolic risk profile in patients with atrial fibrillation in internal and cardiologic outpatient clinics in slovakia: Data from registry of atrial FIBrillation in real life practice (REALFIB*). <i>Cardiology Letters</i> 2012;21(3):98-110.                           | 593           | Study Design             |
| Hatzinikolau-Kotsakou E. Management of heart failure patients with atrial fibrillation: Drugs. <i>Mediterranean Journal of Pacing and Electrophysiology</i> 2006;8(1-2):7-13.                                                                                                                                           | 904           | Study Design             |
| Hatzinikolau-Kotsakou E. Rhythm or rate control: Which is the best therapeutic strategy in patients with heart failure. <i>Mediterranean Journal of Pacing and Electrophysiology</i> 2010;12(3-4):35-9.                                                                                                                 | 754           | Study Population         |
| Hayashi J, Nakazawa S, Oguma F, Miyamura H, Eguchi S. Combined warfarin and antiplatelet therapy after St. Jude Medical valve replacement for mitral valve disease. <i>J Am Coll Cardiol</i> 1994 Mar 1;23(3):672-7.                                                                                                    | 473           | Study Population         |
| Hayes CR, Keane D. Safety of atrial fibrillation ablation with novel multi-electrode array catheters on uninterrupted anticoagulation-a single-center experience. <i>J Interv Card Electrophysiol</i> 2010 Mar;27(2):117-22.                                                                                            | 156           | Intervention/Comparators |
| He H, Kang J, Tao H, Zhen B, Zhang M, Long D, et al. Conventional oral anticoagulation may not replace prior transesophageal echocardiography for the patients with planned catheter ablation for atrial fibrillation. <i>Journal of Interventional Cardiac Electrophysiology</i> 2009;24(1):19-26.                     | 819           | Intervention/Comparators |



| Reference                                                                                                                                                                                                                                                                                                                                                          | Ref ID | Reason                   |
|--------------------------------------------------------------------------------------------------------------------------------------------------------------------------------------------------------------------------------------------------------------------------------------------------------------------------------------------------------------------|--------|--------------------------|
| Healey JS, Hart RG, Pogue J, Pfeffer MA, Hohnloser SH, De CR, et al. Risks and benefits of oral anticoagulation compared with clopidogrel plus aspirin in patients with atrial fibrillation according to stroke risk: the atrial fibrillation clopidogrel trial with irbesartan for prevention of vascular events (ACTIVE-W). <i>Stroke</i> 2008 May;39(5):1482-6. | 206    | Intervention/Comparators |
| Hegland D, Piccini JP, Goldstein LB, Daubert JP. Cerebral magnetic resonance findings in asymptomatic patients after atrial fibrillation catheter ablation: Cause for alarm or further study? <i>Journal of Cardiovascular Electrophysiology</i> 2011;22(9):969-72.                                                                                                | 671    | Study Design             |
| Heidbuchel H, Verhamme P. Dabigatran for stroke prevention in atrial fibrillation: from RE-LY to daily clinical practice. <i>Acta Cardiol</i> 2010 Oct;65(5):491-7.                                                                                                                                                                                                | 133    | Study Design             |
| Helbing T, Bode C, Moser M. [Rivaroxaban in the prevention and treatment of thromboembolic disorders]. <i>Hamostaseologie</i> 2012;32(3):195-202.                                                                                                                                                                                                                  | 36     | Study Design             |
| Helgason CM, Hoff JA, Kondos GT, Brace LD. Platelet aggregation in patients with atrial fibrillation taking aspirin or warfarin. <i>Stroke</i> 1993 Oct;24(10):1458-61.                                                                                                                                                                                            | 478    | Outcomes                 |
| Hellemons BS, Langenberg M, Lodder J, Vermeer F, Schouten HJ, Lemmens TG, et al. Primary prevention of arterial thromboembolism in nonrheumatic atrial fibrillation: the PATAF trial study design. <i>Control Clin Trials</i> 1999 Aug;20(4):386-93.                                                                                                               | 423    | Study Design             |
| Hellerstedt B, Pienta KJ, Redman BG, Esper P, Dunn R, Fardig J, et al. Phase II trial of oral cyclophosphamide, prednisone, and diethylstilbestrol for androgen-independent prostate carcinoma. <i>Cancer</i> 2003;98(8):1603-10.                                                                                                                                  | 974    | Study Population         |
| Hemkens LG, Hilden KM, Hartschen S, Kaiser T, Didjurgeit U, Hansen R, et al. A randomized trial comparing INR monitoring devices in patients with anticoagulation self-management: Evaluation of a novel error-grid approach. <i>Journal of Thrombosis and Thrombolysis</i> 2008;26(1):22-30.                                                                      | 833    | Intervention/Comparators |
| Henry DM. Update on dabigatran for stroke prevention in atrial fibrillation. <i>Conn Med</i> 2011 Sep;75(8):479-83.                                                                                                                                                                                                                                                | 78     | Study Design             |
| Hernandez AF, Hammill BG, Peterson ED, Yancy CW, Schulman KA, Curtis LH, et al. Relationships between emerging measures of heart failure processes of care and clinical outcomes. <i>Am Heart J</i> 2010 Mar;159(3):406-13.                                                                                                                                        | 149    | Study Design             |
| Hijazi Z, Oldgren J, Andersson U, Connolly SJ, Ezekowitz MD, Hohnloser SH, et al. Cardiac biomarkers are associated with an increased risk of stroke and death in patients with atrial fibrillation: a Randomized Evaluation of Long-term Anticoagulation Therapy (RE-LY) substudy. <i>Circulation</i> 2012 Apr 3;125(13):1605-16.                                 | 60     | Study Design             |
| Hinchey JA, Shephard T, Tonn ST, Ruthazer R, Hermann RC, Selker HP, et al. The Stroke Practice Improvement Network: a quasiexperimental trial of a multifaceted intervention to improve quality. <i>J Stroke Cerebrovasc Dis</i> 2010 Mar;19(2):130-7.                                                                                                             | 153    | Study Population         |
| Hirsh J, Dalen JE, Anderson DR, Poller L, Bussey H, Ansell J, et al. Oral anticoagulants: Mechanism of action, clinical effectiveness, and optimal therapeutic range. <i>Chest</i> 2001;119(1 SUPPL.):8S-21S.                                                                                                                                                      | 1053   | Study Design             |
| Hobbs FD, Roalfe AK, Lip GY, Fletcher K, Fitzmaurice DA, Mant J. Performance of stroke risk scores in older people with atrial fibrillation not taking warfarin: comparative cohort study from BAFTA trial. <i>BMJ</i> 2011;342:d3653.                                                                                                                             | 101    | Study Design             |

| <b>Reference</b>                                                                                                                                                                                                                                                                                      | <b>Ref ID</b> | <b>Reason</b>            |
|-------------------------------------------------------------------------------------------------------------------------------------------------------------------------------------------------------------------------------------------------------------------------------------------------------|---------------|--------------------------|
| Hochtl T, Sinnaeve PR, Adriaenssens T, Huber K. Oral antiplatelet therapy in acute coronary syndromes: Update 2012. <i>European Heart Journal: Acute Cardiovascular Care</i> 2012;1(1):79-86.                                                                                                         | 613           | Study Design             |
| Hoffmann P, Keller F. Increased major bleeding risk in patients with kidney dysfunction receiving enoxaparin: A meta-analysis. <i>European Journal of Clinical Pharmacology</i> 2012;68(5):757-65.                                                                                                    | 605           | Intervention/Comparators |
| Hohnloser SH, Connolly SJ. Combined antiplatelet therapy in atrial fibrillation: Review of the literature and future research avenues. <i>Journal of Cardiovascular Electrophysiology</i> 2003;14(9 SUPPL.):S60-S63.                                                                                  | 981           | Study Design             |
| Hohnloser SH, Diener HC. Dabigatran for stroke prevention in atrial fibrillation. <i>Hamostaseologie</i> 2012;32(3):216-20.                                                                                                                                                                           | 39            | Study Design             |
| Hohnloser SH, Kuck KH. Atrial fibrillation - Maintaining sinus rhythm versus ventricular rate control: The PIAF trial. <i>Journal of Cardiovascular Electrophysiology</i> 1998;9(8 SUPPL.):S121-S126.                                                                                                 | 1095          | Intervention/Comparators |
| Hohnloser SH, Kuck KH. Atrial fibrillation: maintaining stability of sinus rhythm or ventricular rate control? The need for prospective data: the PIAF trial. <i>Pacing Clin Electrophysiol</i> 1997 Aug;20(8 Pt 1):1989-92.                                                                          | 441           | Study Design             |
| Hohnloser SH, Pajitnev D, Pogue J, Healey JS, Pfeffer MA, Yusuf S, et al. Incidence of stroke in paroxysmal versus sustained atrial fibrillation in patients taking oral anticoagulation or combined antiplatelet therapy: an ACTIVE W Substudy. <i>J Am Coll Cardiol</i> 2007 Nov 27;50(22):2156-61. | 214           | Intervention/Comparators |
| Holbrook A, Labiris R, Goldsmith CH, Ota K, Harb S, Sebaldt RJ. Influence of decision aids on patient preferences for anticoagulant therapy: a randomized trial. <i>CMAJ</i> 2007 May 22;176(11):1583-7.                                                                                              | 232           | Intervention/Comparators |
| Holden J, Holden K. Comparative effectiveness of general practitioner versus pharmacist dosing of patients requiring anticoagulation in the community. <i>J Clin Pharm Ther</i> 2000 Feb;25(1):49-54.                                                                                                 | 396           | Intervention/Comparators |
| Hollands JM, Gowan M, Riney JN, Deal EN, Kates AM. Role of new drugs for management of atrial fibrillation. <i>Ann Pharmacother</i> 2012 Dec;46(12):1656-70.                                                                                                                                          | 11            | Study Design             |
| Holm T, Deutch S, Lassen JF, Jastrup B, Husted SE, Heickendorff L. Prospective evaluation of the quality of oral anticoagulation management in an outpatient clinic and in general practices. <i>Thrombosis Research</i> 2002;105(2):103-8.                                                           | 1020          | Study Design             |
| Holmes DR, Reddy VY, Turi ZG, Doshi SK, Sievert H, Buchbinder M, et al. Percutaneous closure of the left atrial appendage versus warfarin therapy for prevention of stroke in patients with atrial fibrillation: a randomised non-inferiority trial. <i>Lancet</i> 2009 Aug 15;374(9689):534-42.      | 177           | Intervention/Comparators |
| Holmes Jr DR. Atrial fibrillation and stroke management: Present and future. <i>Seminars in Neurology</i> 2010;30(5):528-36.                                                                                                                                                                          | 727           | Study Design             |
| Holmstrom M, Johnsson H, Larfars G, Malmstrom R, Hjemdahl P. [New drug in atrial fibrillation--how does it function in regular health care?]. <i>Lakartidningen</i> 2009 Nov 4;106(45):3019-20.                                                                                                       | 160           | Study Design             |
| Hong KS, Yegiaian S, Lee M, Lee J, Saver JL. Declining stroke and vascular event recurrence rates in secondary prevention trials over the past 50 years and consequences for current trial design. <i>Circulation</i> 2011;123(19):2111-9.                                                            | 693           | Study Design             |

| Reference                                                                                                                                                                                                                                                                                                                                                                                                        | Ref ID | Reason                   |
|------------------------------------------------------------------------------------------------------------------------------------------------------------------------------------------------------------------------------------------------------------------------------------------------------------------------------------------------------------------------------------------------------------------|--------|--------------------------|
| Hoppensteadt D, Fareed J, Klein AL, Jasper SE, Apperson-Hansen C, Lieber EA, et al. Comparison of Anticoagulant and Anti-Inflammatory Responses Using Enoxaparin Versus Unfractionated Heparin for Transesophageal Echocardiography-Guided Cardioversion of Atrial Fibrillation(dagger)(dagger)A list of participating clinical sites appears in the Appendix. American Journal of Cardiology 2008;102(7):842-6. | 830    | Intervention/Comparators |
| Hori M. [Series: Clinical study from Japan and its reflections RE-LY trial]. Nihon Naika Gakkai Zasshi 2012 May 10;101(5):1432-9.                                                                                                                                                                                                                                                                                | 42     | Study Design             |
| Howard PA, Duncan PW. Primary stroke prevention in nonvalvular atrial fibrillation: implementing the clinical trial findings. Ann Pharmacother 1997 Oct;31(10):1187-96.                                                                                                                                                                                                                                          | 440    | Study Design             |
| Howard PA. Dabigatran: Will it replace warfarin for stroke prevention in atrial fibrillation? Hospital Pharmacy 2012;47(3):181-6.                                                                                                                                                                                                                                                                                | 624    | Study Design             |
| Howitt A, Armstrong D. Implementing evidence based medicine in general practice: audit and qualitative study of antithrombotic treatment for atrial fibrillation. BMJ 1999 May 15;318(7194):1324-7.                                                                                                                                                                                                              | 427    | Intervention/Comparators |
| Hoyt RH, Wood M, Daoud E, Feld G, Sehra R, Pelkey W, et al. Transvenous catheter cryoablation for treatment of atrial fibrillation: Results of a feasibility study. PACE - Pacing and Clinical Electrophysiology 2005;28(SUPPL. 1):S78-S82.                                                                                                                                                                      | 936    | Intervention/Comparators |
| Hu DY. [The efficacy and safety of antithrombotic therapy with warfarin in nonrheumatic atrial fibrillation]. Zhonghua Nei Ke Za Zhi 2006 Oct;45(10):800-3.                                                                                                                                                                                                                                                      | 246    | Intervention/Comparators |
| Hua TD, Vormfelde SV, Abu AM, Schneider-Rudt H, Sobotta P, Friede T, et al. Practice nurse-based, individual and video-assisted patient education in oral anticoagulation--protocol of a cluster-randomized controlled trial. BMC Fam Pract 2011;12:17.                                                                                                                                                          | 109    | Intervention/Comparators |
| Huang HY, Kawabata H, Li D, Simon T. Unmet medical needs in non-valvular atrial fibrillation patients who use warfarin for secondary prevention of stroke. Circulation 2012;126(21).                                                                                                                                                                                                                             | 535    | Study Design             |
| Huqi A. Warfarin and dabigatran: An historical handover? Heart and Metabolism 2011;(51):39-40.                                                                                                                                                                                                                                                                                                                   | 640    | Study Design             |
| Hurley V, Ireson R, Fletcher K, Lip GY, Hobbs FD, Mant J. A cross-sectional study of hypertension in an elderly population (75 years and over) with atrial fibrillation: secondary analysis of data from the Birmingham Atrial Fibrillation in the Aged (BAFTA) randomised controlled trial. Int J Cardiol 2007 Apr 25;117(2):152-6.                                                                             | 254    | Intervention/Comparators |
| Hylek EM, D'Antonio J, Evans-Molina C, Shea C, Henault LE, Regan S. Translating the results of randomized trials into clinical practice: the challenge of warfarin candidacy among hospitalized elderly patients with atrial fibrillation. Stroke 2006 Apr;37(4):1075-80.                                                                                                                                        | 266    | Intervention/Comparators |
| Hylek EM, Evans-Molina C, Shea C, Henault LE, Regan S. Major hemorrhage and tolerability of warfarin in the first year of therapy among elderly patients with atrial fibrillation. Circulation 2007;115(21):2689-96.                                                                                                                                                                                             | 864    | Intervention/Comparators |
| Hylek EM, Frison L, Henault LE, Cupples A. Disparate stroke rates on warfarin among contemporaneous cohorts with atrial fibrillation: Potential insights into risk from a comparative analysis of SPORTIF III versus SPORTIF v. Stroke 2008;39(11):3009-14.                                                                                                                                                      | 826    | Intervention/Comparators |

| Reference                                                                                                                                                                                                                                                                                                                                                                     | Ref ID | Reason                   |
|-------------------------------------------------------------------------------------------------------------------------------------------------------------------------------------------------------------------------------------------------------------------------------------------------------------------------------------------------------------------------------|--------|--------------------------|
| Hylek EM, Skates SJ, Sheehan MA, Singer DE. An analysis of the lowest effective intensity of prophylactic anticoagulation for patients with nonrheumatic atrial fibrillation. <i>New England Journal of Medicine</i> 1996;335(8):540-6.                                                                                                                                       | 1119   | Study Design             |
| Ingelgard A, Hollowell J, Reddy P, Gold K, Tran K, Fitzmaurice D. What are the barriers to warfarin use in atrial fibrillation?: Development of a questionnaire. <i>J Thromb Thrombolysis</i> 2006 Jun;21(3):257-65.                                                                                                                                                          | 262    | Study Design             |
| Inoue H. Risk factors for thromboembolism in patients with atrial fibrillation during treatment with aspirin: A multicenter, cooperative retrospective study. <i>Journal of Cardiology</i> 2000;35(5):373-9.                                                                                                                                                                  | 1067   | Study Design             |
| Ip J, Waldo AL, Lip GY, Rothwell PM, Martin DT, Bersohn MM, et al. Multicenter randomized study of anticoagulation guided by remote rhythm monitoring in patients with implantable cardioverter-defibrillator and CRT-D devices: Rationale, design, and clinical characteristics of the initially enrolled cohort The IMPACT study. <i>Am Heart J</i> 2009 Sep;158(3):364-70. | 174    | Study Design             |
| Ischaemic stroke: Acute-phase drug therapy. Mostly aspirin and heparin. <i>Prescrire International</i> 2005;14(78):146-52.                                                                                                                                                                                                                                                    | 919    | Study Design             |
| Ito T, Suwa M, Nakamura T, Miyazaki S, Hirota Y, Kawamura K. Influence of warfarin therapy on left atrial spontaneous echo contrast in nonvalvular atrial fibrillation. <i>American Journal of Cardiology</i> 1999;84(7):857-9.                                                                                                                                               | 1081   | Intervention/Comparators |
| Iwahashi H, Kimura M, Zaitso R, Motomura T, Morita T. [Comparison of the prothrombin levels between the patients with atrial fibrillation and patients with cardiac pacemaker implantation due to sick sinus syndrome during anticoagulation therapy with warfarin]. <i>Kyobu Geka</i> 2002 Sep;55(10):854-6.                                                                 | 352    | Intervention/Comparators |
| Jackson SL, Peterson GM, Vial JH, Daud R, Ang SY. Outcomes in the management of atrial fibrillation: Clinical trial results can apply in practice. <i>Internal Medicine Journal</i> 2001;31(6):329-36.                                                                                                                                                                        | 1026   | Study Design             |
| Jackson SL, Peterson GM, Vial JH, Jupe DML. Improving the outcomes of anticoagulation: An evaluation of home follow-up of warfarin initiation. <i>Journal of Internal Medicine</i> 2004;256(2):137-44.                                                                                                                                                                        | 950    | Intervention/Comparators |
| Jacobs JM, Stessman J. Dabigatran: Do we have sufficient data? <i>Archives of Internal Medicine</i> 2012;172(5):403-4.                                                                                                                                                                                                                                                        | 621    | Study Design             |
| Jais P, Cauchemez B, Macle L, Daoud E, Khairy P, Subbiah R, et al. Catheter ablation versus antiarrhythmic drugs for atrial fibrillation: The A4 study. <i>Circulation</i> 2008;118(24):2498-505.                                                                                                                                                                             | 821    | Intervention/Comparators |
| Jessurun ER, van Hemel NM, Defauw JJ, Brutel DLR, Stofmeel MA, Kelder JC, et al. A randomized study of combining maze surgery for atrial fibrillation with mitral valve surgery. <i>J Cardiovasc Surg (Torino)</i> 2003 Feb;44(1):9-18.                                                                                                                                       | 345    | Intervention/Comparators |
| Johnson SR, Mehta S, Granton JT. Anticoagulation in pulmonary arterial hypertension: A qualitative systematic review. <i>European Respiratory Journal</i> 2006;28(5):999-1004.                                                                                                                                                                                                | 884    | Study Population         |
| Johnston SC, Sidney S, Hills NK, Grosvenor D, Klingman JG, Bernstein A, et al. Standardized discharge orders after stroke: Results of the quality improvement in stroke prevention (QUISP) cluster randomized trial. <i>Annals of Neurology</i> 2010;67(5):579-89.                                                                                                            | 763    | Study Population         |

| Reference                                                                                                                                                                                                                                                                                                           | Ref ID | Reason                   |
|---------------------------------------------------------------------------------------------------------------------------------------------------------------------------------------------------------------------------------------------------------------------------------------------------------------------|--------|--------------------------|
| Jones SO, Odle M, Stajduhar K, Leclerc K, Eckart RE. Direct admission to cardiology for patients hospitalized for atrial fibrillation reduces length of stay and increases guideline adherence. <i>Mil Med</i> 2006 Jun;171(6):567-71.                                                                              | 255    | Intervention/Comparators |
| Jong GP, Chang MH, Chang TC, Chou P, Fu CY, Tien LY, et al. Long-term efficacy and safety of very-low-dose amiodarone treatment for the maintenance of sinus rhythm in patients with chronic atrial fibrillation after successful direct-current cardioversion. <i>Chinese Medical Journal</i> 2006;119(24):2030-5. | 879    | Intervention/Comparators |
| Joubert J, Reid C, Barton D, Cumming T, McLean A, Joubert L, et al. Integrated care improves risk-factor modification after stroke: Initial results of the integrated care for the reduction of secondary stroke model. <i>Journal of Neurology, Neurosurgery and Psychiatry</i> 2009;80(3):279-84.                 | 814    | Intervention/Comparators |
| Jowett S, Bryan S, Mahe I, Brieger D, Carlsson J, Kartman B, et al. A multinational investigation of time and traveling costs in attending anticoagulation clinics. <i>Value Health</i> 2008 Mar;11(2):207-12.                                                                                                      | 205    | Study Design             |
| Jowett S, Bryan S, Mant J, Fletcher K, Roalfe A, Fitzmaurice D, et al. Cost effectiveness of warfarin versus aspirin in patients older than 75 years with atrial fibrillation. <i>Stroke</i> 2011 Jun;42(6):1717-21.                                                                                                | 108    | Study Design             |
| Jowett S, Bryan S, Poller L, VAN DEN Besselaar AM, VAN DER Meer FJ, Palareti G, et al. The cost-effectiveness of computer-assisted anticoagulant dosage: results from the European Action on Anticoagulation (EAA) multicentre study. <i>J Thromb Haemost</i> 2009 Sep;7(9):1482-90.                                | 182    | Study Design             |
| Kaatz S, Thomas L. The BRIDGE trial: Bridging anticoagulation in patients who require temporary interruption of warfarin therapy for an elective invasive procedure or surgery. Rationale and study design. <i>Journal of Thrombosis and Thrombolysis</i> 2011;31(3):377.                                           | 707    | Study Design             |
| Kaier T, Williams R, Khan S. Will the new European AF guidelines lead to more patients receiving oral anticoagulation therapy? <i>Heart</i> 2011;97:A39.                                                                                                                                                            | 685    | Study Design             |
| Kalra L, Yu G, Perez I, Lakhani A, Donaldson N. Prospective cohort study to determine if trial efficacy of anticoagulation for stroke prevention in atrial fibrillation translates into clinical effectiveness. <i>BMJ</i> 2000 May 6;320(7244):1236-9.                                                             | 395    | Intervention/Comparators |
| Kamath S, Blann AD, Caine GJ, Gurney D, Chin BS, Lip GY. Platelet P-selectin levels in relation to plasma soluble P-selectin and beta-thromboglobulin levels in atrial fibrillation. <i>Stroke</i> 2002 May;33(5):1237-42.                                                                                          | 364    | Study Design             |
| Kamath S, Blann AD, Chin BS, Lip GY. A prospective randomized trial of aspirin-clopidogrel combination therapy and dose-adjusted warfarin on indices of thrombogenesis and platelet activation in atrial fibrillation. <i>J Am Coll Cardiol</i> 2002 Aug 7;40(3):484-90.                                            | 356    | Intervention/Comparators |
| Kamel H, Johnston SC, Easton JD, Kim AS. Cost-effectiveness of dabigatran compared with warfarin for stroke prevention in patients with atrial fibrillation and prior stroke or transient ischemic attack. <i>Stroke</i> 2012 Mar;43(3):881-3.                                                                      | 62     | Study Design             |
| Kamran SH, Muzammil SM, Kamal AK. What are the new therapeutic alternatives to warfarin in atrial fibrillation? <i>Journal of the Pakistan Medical Association</i> 2013;63(1):129-30.                                                                                                                               | 517    | Study Design             |
| Kanamasa K, Naito N, Morii H, Nakano K, Tanaka Y, Kitayama K, et al. Eccentric dosing of nitrates does not increase cardiac events in patients with healed myocardial infarction. <i>Hypertension Research</i> 2004;27(8):563-72.                                                                                   | 952    | Study Population         |

| Reference                                                                                                                                                                                                                                                                                      | Ref ID | Reason                   |
|------------------------------------------------------------------------------------------------------------------------------------------------------------------------------------------------------------------------------------------------------------------------------------------------|--------|--------------------------|
| Kaner E, Heaven B, Rapley T, Murtagh M, Graham R, Thomson R, et al. Medical communication and technology: a video-based process study of the use of decision aids in primary care consultations. <i>BMC Med Inform Decis Mak</i> 2007;7:2.                                                     | 247    | Intervention/Comparators |
| Kanj MH, Wazni O, Fahmy T, Thal S, Patel D, Elay C, et al. Pulmonary Vein Antral Isolation Using an Open Irrigation Ablation Catheter for the Treatment of Atrial Fibrillation. A Randomized Pilot Study. <i>J Am Coll Cardiol</i> 2007;49(15):1634-41.                                        | 866    | Study Design             |
| Kanorskii SG, Shevelev VI, Zafiraki VK, Zingilevskii KB. [Prevention of ischemic stroke in middle aged patients with atrial fibrillation. Effect of sinus rhythm maintenance, aspirin, warfarin, and simvastatin]. <i>Kardiologiia</i> 2007;47(1):26-30.                                       | 235    | Intervention/Comparators |
| Kansal AR, Sorensen SV, Gani R, Robinson P, Pan F, Plumb JM, et al. Cost-effectiveness of dabigatran etexilate for the prevention of stroke and systemic embolism in UK patients with atrial fibrillation. <i>Heart</i> 2012 Apr;98(7):573-8.                                                  | 54     | Study Design             |
| Karatasakis GT, Gotsis AC, Cokkinos DV. Influence of mitral regurgitation on left atrial thrombus and spontaneous echocardiographic contrast in patients with rheumatic mitral valve disease. <i>American Journal of Cardiology</i> 1995;76(4):279-81.                                         | 1133   | Study Population         |
| Kaul S, Diamond GA, Weintraub WS. Trials and tribulations of non-inferiority: the ximelagatran experience. <i>J Am Coll Cardiol</i> 2005 Dec 6;46(11):1986-95.                                                                                                                                 | 277    | Intervention/Comparators |
| Kawabata VS, Vianna CB, Moretti MA, Gonzalez MM, Ferreira JF, Timerman S, et al. Monophasic versus biphasic waveform shocks for atrial fibrillation cardioversion in patients with concomitant amiodarone therapy. <i>Europace</i> 2007;9(2):143-6.                                            | 876    | Intervention/Comparators |
| Kawamura M, Ito H, Onuki T, Miyoshi F, Watanabe N, Asano T, et al. Candesartan decreases type III procollagen-N-peptide levels and inflammatory marker levels and maintains sinus rhythm in patients with atrial fibrillation. <i>Journal of Cardiovascular Pharmacology</i> 2010;55(5):511-7. | 761    | Intervention/Comparators |
| Kealey C, Chen Z, Thorn CF, Whitehead AS, Price M, Samaha FF, et al. Warafin and cytochrome P450 2C9 genotype: Possible ethnic variation in warafin sensitivity. <i>Pharmacogenomics</i> 2007;8(3):217-25.                                                                                     | 872    | Study Design             |
| Kellen JC, Russell ML. Physician specialty is associated with differences in warfarin use for atrial fibrillation. <i>Can J Cardiol</i> 1998 Mar;14(3):365-8.                                                                                                                                  | 437    | Study Population         |
| Kerbel R, Feinbloom D. Dabigatran etexilate for the prevention of stroke in patients with nonvalvular atrial fibrillation. <i>Clinical Practice</i> 2012;9(6):629-37.                                                                                                                          | 544    | Study Design             |
| Kessler CM. Management of bleeding complications in patients receiving new oral anti-IIa and anti-Xa anticoagulants. <i>Haemophilia</i> 2013;19:9.                                                                                                                                             | 510    | Study Design             |
| Key N. Comparison of oral versus intravenous phytonadione in patients with excessive anticoagulation. <i>Curr Hematol Rep</i> 2004 Sep;3(5):315-6.                                                                                                                                             | 308    | Intervention/Comparators |
| Khairy P, Landzberg MJ, Gatzoulis MA, Mercier LA, Fernandes SM, Cote JM, et al. Transvenous pacing leads and systemic thromboemboli in patients with intracardiac shunts: A multicenter study. <i>Circulation</i> 2006;113(20):2391-7.                                                         | 892    | Study Population         |
| Khan M, Kamal AK. Atrial fibrillation, is warfarin the only option for stroke prevention? <i>J Pak Med Assoc</i> 2011 Apr;61(4):406-7.                                                                                                                                                         | 110    | Study Design             |

| <b>Reference</b>                                                                                                                                                                                                                                                                                             | <b>Ref ID</b> | <b>Reason</b>            |
|--------------------------------------------------------------------------------------------------------------------------------------------------------------------------------------------------------------------------------------------------------------------------------------------------------------|---------------|--------------------------|
| Khan M, Kamal AK. Atrial fibrillation, is warfarin the only option for stroke prevention? J Pak Med Assoc 2011 Mar;61(3):301-2.                                                                                                                                                                              | 111           | Study Design             |
| Khan M, Raza E, Kamal AK. What are the emerging therapeutic alternatives to warfarin in stroke patients? How would the results of RE-LY benefit Pakistanis? J Pak Med Assoc 2011 Jun;61(6):612-3.                                                                                                            | 71            | Study Design             |
| Khan TI, Kamali F, Kesteven P, Avery P, Wynne H. The value of education and self-monitoring in the management of warfarin therapy in older patients with unstable control of anticoagulation. Br J Haematol 2004 Aug;126(4):557-64.                                                                          | 309           | Intervention/Comparators |
| Khaykin Y, Wang X, Natale A, Wazni OM, Skanes AC, Humphries KH, et al. Cost comparison of ablation versus antiarrhythmic drugs as first-line therapy for atrial fibrillation: An economic evaluation of the RAAFT pilot study. Journal of Cardiovascular Electrophysiology 2009;20(1):7-12.                  | 820           | Study Design             |
| Khoo CW, Lip GY. Insights from the dabigatran versus warfarin in patients with atrial fibrillation (RE-LY) trial. Expert Opin Pharmacother 2010 Mar;11(4):685-7.                                                                                                                                             | 154           | Study Design             |
| Kim KH, Na JO, Nam GB, Jin ES, Choi H, Kim SH, et al. Effect of catheter ablation on the left ventricular mass index and other echocardiograph parameters in atrial fibrillation patients: Comparison with antiarrhythmic drug treatment. Journal of Echocardiography 2011;9(2):51-8.                        | 688           | Intervention/Comparators |
| Kim MH, Morady F, Conlon B, Kronick S, Lowell M, Bruckman D, et al. A prospective, randomized, controlled trial of an emergency department-based atrial fibrillation treatment strategy with low-molecular-weight heparin. Ann Emerg Med 2002 Aug;40(2):187-92.                                              | 357           | Study Design             |
| Kim MH, Trohman RG, Eagle KA. Low molecular weight heparin in atrial fibrillation management: facts, fiction, future. Card Electrophysiol Rev 2003 Dec;7(4):397-400.                                                                                                                                         | 317           | Study Design             |
| Kimmel SE, Troxel AB. Novel incentive-based approaches to adherence. Clinical Trials 2012;9(6):689-95.                                                                                                                                                                                                       | 526           | Study Design             |
| Kimura K, Iguchi Y, Shibazaki K, Kobayashi K, Uemura J, Aoki J, et al. Recanalization between 1 and 24 hours after t-PA therapy is a strong predictor of cerebral hemorrhage in acute ischemic stroke patients. Journal of the Neurological Sciences 2008;270(1-2):48-52.                                    | 834           | Study Population         |
| Kin YH, Lim HE, Pak HN, Kwak JJ, Park JS, Choi JI, et al. Role of residual potentials inside circumferential pulmonary veins ablation lines in the recurrence of paroxysmal atrial fibrillation. Journal of Cardiovascular Electrophysiology 2010;21(9):959-65.                                              | 746           | Study Design             |
| King A. Arrhythmias: Apixaban triumphs over aspirin for stroke prevention in patients with atrial fibrillation. Nature Reviews Cardiology 2011;8(4):181.                                                                                                                                                     | 706           | Study Design             |
| King CS, Holley AB, Jackson JL, Shorr AF, Moores LK. Twice vs three times daily heparin dosing for thromboembolism prophylaxis in the general medical population: A metaanalysis. Chest 2007;131(2):507-16.                                                                                                  | 877           | Intervention/Comparators |
| Kirchhof P, Auricchio A, Bax J, Crijns H, Camm J, Diener HC, et al. Outcome parameters for trials in atrial fibrillation: Recommendations from a consensus conference organized by the German atrial fibrillation competence NETWORK and the European heart rhythm association. Europace 2007;9(11):1006-23. | 851           | Study Design             |

| Reference                                                                                                                                                                                                                                                                                                          | Ref ID | Reason                   |
|--------------------------------------------------------------------------------------------------------------------------------------------------------------------------------------------------------------------------------------------------------------------------------------------------------------------|--------|--------------------------|
| Kistler JP, Singer DE, Millenson MM, Bauer KA, Gress DR, Barzegar S, et al. Effect of low-intensity warfarin anticoagulation on level of activity of the hemostatic system in patients with atrial fibrillation. BAATAF Investigators. <i>Stroke</i> 1993 Sep;24(9):1360-5.                                        | 479    | Intervention/Comparators |
| Kita K, Lyn R, Cortes G, Clavijo L. The ARISTOTLE trial: Apixaban versus warfarin in patients with atrial fibrillation. <i>Interventional Cardiology</i> 2011;3(6):637.                                                                                                                                            | 644    | Study Design             |
| Kizer JR, Dahlof B, Kjeldsen SE, Julius S, Beevers G, De Faire U, et al. Stroke reduction in hypertensive adults with cardiac hypertrophy randomized to losartan versus atenolol: The Losartan Intervention for Endpoint reduction in hypertension study. <i>Hypertension</i> 2005;45(1):46-52.                    | 937    | Study Population         |
| Klein AL, Grimm RA, Black IW, Leung DY, Chung MK, Vaughn SE, et al. Cardioversion guided by transesophageal echocardiography: the ACUTE Pilot Study. A randomized, controlled trial. Assessment of Cardioversion Using Transesophageal Echocardiography. <i>Annals of Internal Medicine</i> 1997;126:200-9.        | 1190   | Study Design             |
| Klein AL, Grimm RA, Black IW, Leung DY, Chung MK, Vaughn SE, et al. Cardioversion guided by transesophageal echocardiography: The ACUTE Pilot Study: A randomized, controlled trial. <i>Annals of Internal Medicine</i> 1997;126(3):200-9.                                                                         | 1115   | Study Design             |
| Klein AL, Grimm RA, Jasper SE, Murray RD, Apperson-Hansen C, Lieber EA, et al. Efficacy of transesophageal echocardiography-guided cardioversion of patients with atrial fibrillation at 6 months: a randomized controlled trial. <i>Am Heart J</i> 2006 Feb;151(2):380-9.                                         | 270    | Intervention/Comparators |
| Klein AL, Grimm RA, Murray RD, Apperson-Hansen C, Asinger RW, Black IW, et al. Use of transesophageal echocardiography to guide cardioversion in patients with atrial fibrillation. <i>N Engl J Med</i> 2001 May 10;344(19):1411-20.                                                                               | 375    | Intervention/Comparators |
| Klein AL, Murray RD, Grimm RA, Li J, Apperson-Hansen C, Jasper SE, et al. Bleeding complications in patients with atrial fibrillation undergoing cardioversion randomized to transesophageal echocardiographically guided and conventional anticoagulation therapies. <i>Am J Cardiol</i> 2003 Jul 15;92(2):161-5. | 334    | Intervention/Comparators |
| Klein KL, Berdeaux DH, Milhollen JD, Hilden JT, Obernuefemann NJ, Koch MA, et al. Equal effectiveness of very-low-intensity anticoagulation and standard low-intensity anticoagulation: a pilot study. <i>South Med J</i> 1995 Nov;88(11):1136-9.                                                                  | 458    | Study Design             |
| Klug E, Bryer A, Aalbers J. South African experts comment on FDA approval of dabigatran in atrial fibrillation. <i>Cardiovasc J Afr</i> 2011 Jan;22(1):50.                                                                                                                                                         | 119    | Study Design             |
| Knapen MH, Hellemons-Boode BS, Langenberg-Ledeboer M, Knottnerus JA, Hamulyak K, Price PA, et al. Effect of oral anticoagulant treatment on markers for calcium and bone metabolism. <i>Haemostasis</i> 2000 Nov;30(6):290-7.                                                                                      | 374    | Intervention/Comparators |
| Kodoth V, Castro NC, Glover BM, Anderson JM, Escalona OJ, Lau E, et al. Waveform optimization for internal cardioversion of atrial fibrillation. <i>J Electrocardiol</i> 2011 Nov;44(6):689-93.                                                                                                                    | 76     | Intervention/Comparators |
| Kodras K, Benesch T, Neumann I, Haas M. Comparison of two dialysers (AN69ST vs. FX100) for heparin-free dialysis in patients with oral anticoagulation. <i>Blood Purification</i> 2008;26(3):226-30.                                                                                                               | 842    | Intervention/Comparators |
| Koefoed BG, Gullov AL, Petersen P. [Atrial fibrillation and apoplexy--risks and prevention]. <i>Nord Med</i> 1996 Jun;111(6):171-5.                                                                                                                                                                                | 451    | Study Design             |



| <b>Reference</b>                                                                                                                                                                                                                                                                              | <b>Ref ID</b> | <b>Reason</b>            |
|-----------------------------------------------------------------------------------------------------------------------------------------------------------------------------------------------------------------------------------------------------------------------------------------------|---------------|--------------------------|
| Kohli P, Cannon CP. Dabigatran associated with increased risk of acute coronary events. Evidence-Based Medicine 2013;18(1):e9.                                                                                                                                                                | 513           | Study Design             |
| Konstantinides S, Munzel T. [Apixaban]. Hamostaseologie 2012;32(3):203-11.                                                                                                                                                                                                                    | 38            | Study Design             |
| Koopman MMW, Buller HR. Short- and long-acting synthetic pentasaccharides. Journal of Internal Medicine 2003;254(4):335-42.                                                                                                                                                                   | 978           | Study Design             |
| Koren-Michowitz M, Avni B, Michowitz Y, Moravski G, Efrati S, Golik A. Early onset of hyperkalemia in patients treated with low molecular weight heparin: A prospective study. Pharmacoepidemiology and Drug Safety 2004;13(5):299-302.                                                       | 961           | Intervention/Comparators |
| Koretsune Y. The role of new anticoagulants for patients with atrial fibrillation - From the mega trials to clinical practices. Japanese Journal of Clinical Pharmacology and Therapeutics 2011;42(5):315-9.                                                                                  | 667           | Study Design             |
| Kottkamp H, Willems S, Hindricks G, Chen X, Haverkamp W, Hasfeld M, et al. Oral anticoagulation for prevention of thromboembolism in nonrheumatic atrial fibrillation: Indications, efficacy, and risk. Zeitschrift fur Kardiologie 1993;82(11):667-73.                                       | 1155          | Study Design             |
| Koudstaal PJ. [Prevention of a brain infarct in patients with non-rheumatic atrial fibrillation]. Ned Tijdschr Geneesk 1989 Jul 29;133(30):1485-6.                                                                                                                                            | 502           | Outcomes                 |
| Koudstaal PJ. Anticoagulant treatment in stroke prevention. Revue Neurologique 1999;155(9):694-6.                                                                                                                                                                                             | 1080          | Study Design             |
| Koudstaal PJ. Optimal oral anticoagulant therapy in patients with nonrheumatic atrial fibrillation and recent cerebral ischemia. New England Journal of Medicine 1995;333(1):5-10.                                                                                                            | 1134          | Intervention/Comparators |
| Kowey PR, Reiffel JA, Myerburg R, Naccarelli GV, Packer DL, Pratt CM, et al. Warfarin and aspirin use in atrial fibrillation among practicing cardiologist (from the AFFECTS Registry). Am J Cardiol 2010 Apr 15;105(8):1130-4.                                                               | 147           | Study Design             |
| Krishnamoorthy S, Lip GYH. Antiarrhythmic drugs for atrial fibrillation: Focus on dronedarone. Expert Review of Cardiovascular Therapy 2009;7(5):473-81.                                                                                                                                      | 803           | Study Design             |
| Krishnan S, Chawla N, Ezekowitz MD, Peixoto AJ. Warfarin therapy and systolic hypertension in men with atrial fibrillation. Am J Hypertens 2005 Dec;18(12 Pt 1):1592-9.                                                                                                                       | 274           | Intervention/Comparators |
| Kristensen L, Nielsen JC, Mortensen PT, Pedersen OL, Pedersen AK, Andersen HR. Incidence of atrial fibrillation and thromboembolism in a randomised trial of atrial versus dual chamber pacing in 177 patients with sick sinus syndrome. Heart 2004 Jun;90(6):661-6.                          | 312           | Study Population         |
| Kubo T, Kitaoka H, Okawa M, Matsumura Y, Hitomi N, Yamasaki N, et al. Lifelong left ventricular remodeling of hypertrophic cardiomyopathy caused by a founder frameshift deletion mutation in the cardiac myosin-binding protein C gene among Japanese. J Am Coll Cardiol 2005;46(9):1737-43. | 911           | Study Design             |
| Kulbertus H. [SPORTIF III and V trials: a major breakthrough for long-term oral anticoagulation]. Rev Med Liege 2003 Dec;58(12):770-3.                                                                                                                                                        | 323           | Intervention/Comparators |
| Kulo A, Mulabegovic N, Kusturica J, Hadzic H, Burnazovic-Ristic L, Rakanovic-Todic M, et al. Outpatient management of oral anticoagulation therapy in patients with nonvalvular atrial fibrillation. Bosn J Basic Med Sci 2009 Nov;9(4):313-9.                                                | 159           | Intervention/Comparators |

| Reference                                                                                                                                                                                                                                                                                                 | Ref ID | Reason                   |
|-----------------------------------------------------------------------------------------------------------------------------------------------------------------------------------------------------------------------------------------------------------------------------------------------------------|--------|--------------------------|
| Kumana CR, Cheung BM, Cheung GT, Ovedal T, Pederson B, Lauder IJ. Rhythm vs. rate control of atrial fibrillation meta-analysed by number needed to treat (Structured abstract). <i>British Journal of Clinical Pharmacology</i> 2005;60:347-54.                                                           | 1187   | Intervention/Comparators |
| Kuznar W. Oral thrombin inhibitor new alternative to treating AF. <i>Cardiology Review</i> 2003;20(6):1+14.                                                                                                                                                                                               | 993    | Study Design             |
| Kwok L, Molckovsky D, Boucher M. Ximelagatran: A new type of oral anticoagulant. <i>International Journal of Technology Assessment in Health Care</i> 2005;21(4):480-6.                                                                                                                                   | 913    | Intervention/Comparators |
| Labeque JN, Laffort P, Lafitte S, Jais C, Coste P, Roudaut R. Treatment of left atrial thrombosis by low molecular weight heparin: A preliminary study of 6 cases. <i>Archives des Maladies du Coeur et des Vaisseaux</i> 2000;93(12):1528-33.                                                            | 1059   | Study Population         |
| Lafuente-Lafuente C, Pautas E, Belmin J. Anticoagulation of older patients: What is new? <i>Presse Medicale</i> 2013;42(2):187-96.                                                                                                                                                                        | 511    | Study Design             |
| Laguna P, Martin A, Del Arco C, Gargantilla P. Risk factors for stroke and thromboprophylaxis in atrial fibrillation: What happens in daily clinical practice? The GEFAUR-1 study. <i>Annals of Emergency Medicine</i> 2004;44(1):3-11.                                                                   | 954    | Study Design             |
| Lakshminarayan K, Borbas C, McLaughlin B, Morris NE, Vazquez G, Luepker RV, et al. A cluster-randomized trial to improve stroke care in hospitals. <i>Neurology</i> 2010;74(20):1634-42.                                                                                                                  | 760    | Intervention/Comparators |
| Lamy A, Tong W, Gao P, Chrolavicius S, Gafni A, Yusuf S, et al. The Cost of Clopidogrel Use in Atrial Fibrillation in the ACTIVE-A Trial. <i>Canadian Journal of Cardiology</i> 2012;28(1):95-101.                                                                                                        | 639    | Study Design             |
| Lancaster TR, Singer DE, Sheehan MA, Oertel LB, Maraventano SW, Hughes RA, et al. The impact of long-term warfarin therapy on quality of life. Evidence from a randomized trial. Boston Area Anticoagulation Trial for Atrial Fibrillation Investigators. <i>Arch Intern Med</i> 1991 Oct;151(10):1944-9. | 493    | Study Design             |
| Lancaster TR, Singer DE, Sheehan MA, Oertel LB, Maraventano SW, Hughes RA, et al. The impact of long-term warfarin therapy on quality of life: Evidence from a randomized trial. <i>Archives of Internal Medicine</i> 1991;151(10):1944-9.                                                                | 1162   | Study Design             |
| Lane DA, Kamphuisen PW, Minini P, Buller HR, Lip GY. Bleeding risk in patients with atrial fibrillation: the AMADEUS study. <i>Chest</i> 2011 Jul;140(1):146-55.                                                                                                                                          | 114    | Intervention/Comparators |
| Lane DA, Lip GYH. Quality of life in older people with atrial fibrillation. <i>Journal of Interventional Cardiac Electrophysiology</i> 2009;25(1):37-42.                                                                                                                                                  | 801    | Study Design             |
| Laupacis A, Connolly SJ, Gent M, Roberts RS, Cairns J, Joyner C. How should results from completed studies influence ongoing clinical trials? The CAFA Study experience. <i>Ann Intern Med</i> 1991 Nov 15;115(10):818-22.                                                                                | 491    | Study Design             |
| Laupacis A, Singer D, Jacobsen A, Dunn M, Dalen J, Albers G. Risk factors for stroke and primary prevention of stroke in atrial fibrillation. <i>Journal of Thrombosis and Thrombolysis</i> 1999;7(1):21-6.                                                                                               | 1091   | Study Design             |
| Laupacis A, Sullivan K, Connolly SJ, Joyner C, Green M, Kerr C, et al. Canadian atrial fibrillation anticoagulation study: Were the patients subsequently treated with warfarin? <i>Canadian Medical Association Journal</i> 1996;154(11):1669-74.                                                        | 1121   | Intervention/Comparators |

| <b>Reference</b>                                                                                                                                                                                                                                                                                                   | <b>Ref ID</b> | <b>Reason</b>            |
|--------------------------------------------------------------------------------------------------------------------------------------------------------------------------------------------------------------------------------------------------------------------------------------------------------------------|---------------|--------------------------|
| Laupacis A, Sullivan K. Canadian atrial fibrillation anticoagulation study: were the patients subsequently treated with warfarin? Canadian Atrial Fibrillation Anticoagulation Study Group. <i>CMAJ</i> 1996 Jun 1;154(11):1669-74.                                                                                | 452           | Study Design             |
| Laupacis A. Atrial fibrillation: Anticoagulants reduce stroke risk by two-thirds. <i>Geriatrics</i> 1994;49(2):18.                                                                                                                                                                                                 | 1154          | Study Design             |
| Lavitola PL, Sampaio RO, Oliveira WA, Boer BN, Tarasoutchi F, Spina GS, et al. Warfarin or aspirin in embolism prevention in patients with mitral valvulopathy and atrial fibrillation. <i>Arq Bras Cardiol</i> 2010 Dec;95(6):749-55.                                                                             | 136           | Study Population         |
| Lechat P, Lardoux H, Mallet A, Sanchez P, Derumeaux G, Lecompte T, et al. [Study of combined anticoagulant (fluidione)-aspirin therapy in patients with atrial fibrillation at high risk for thromboembolic complications. A randomized trial (FFAACS)]. <i>Therapie</i> 2000 Nov;55(6):681-9.                     | 378           | Intervention/Comparators |
| Lechat P, Lardoux H, Mallet A, Sanchez P, Derumeaux G, Lecompte T, et al. Anticoagulant (fluidione)-aspirin combination in patients with high-risk atrial fibrillation. A randomized trial (FFAACS). <i>Therapie</i> 2000;55(6):681-9.                                                                             | 1057          | Intervention/Comparators |
| Lechat P, Lardoux H, Mallet A, Sanchez P, Derumeaux G, Lecompte T, et al. Anticoagulant (fluidione)-aspirin combination in patients with high-risk atrial fibrillation. A randomized trial (Fluidione, Fibrillation Auriculaire, Aspirin et Contraste Spontane; FFAACS). <i>Cerebrovasc Dis</i> 2001;12(3):245-52. | 370           | Intervention/Comparators |
| Lee JK, Klein GJ, Krahn AD, Yee R, Zarnke K, Simpson C, et al. Rate-control versus conversion strategy in postoperative atrial fibrillation: a prospective, randomized pilot study. <i>Am Heart J</i> 2000 Dec;140(6):871-7.                                                                                       | 385           | Study Design             |
| Lee JK, Klein GJ, Krahn AD, Yee R, Zarnke K, Simpson C, et al. Rate-control versus conversion strategy in postoperative atrial fibrillation: Trial design and pilot study results. <i>Cardiac Electrophysiology Review</i> 2003;7(2):178-84.                                                                       | 990           | Study Design             |
| Lee K, Shukla V, Coyle D, Wells G. Establishment of an innovative collaborative between the drug safety and effectiveness network in canada and ispor for application and development of network meta-analysis. <i>Value in Health</i> 2012;15(4):A7.                                                              | 594           | Study Population         |
| Lee S, Monz BU, Clemens A, Brueckmann M, Lip GY. Representativeness of the dabigatran, apixaban and rivaroxaban clinical trial populations to real-world atrial fibrillation patients in the United Kingdom: a cross-sectional analysis using the General Practice Research Database. <i>BMJ Open</i> 2012;2(6).   | 12            | Study Design             |
| Lee S, Mullin R, Blazawski J, Coleman CI. Cost-Effectiveness of Apixaban Compared with Warfarin for Stroke Prevention in Atrial Fibrillation. <i>PLoS ONE</i> 2012;7(10).                                                                                                                                          | 552           | Study Design             |
| Lee VWY, You JHS, Lee KKC, Chau TS, Waye MMY, Cheng G. Factors affecting the maintenance stable warfarin dosage in Hong Kong Chinese patients. <i>Journal of Thrombosis and Thrombolysis</i> 2005;20(1):33-8.                                                                                                      | 918           | Study Design             |
| Lee WM, Larrey D, Olsson R, Lewis JH, Keisu M, Auclert L, et al. Hepatic findings in long-term clinical trials of ximelagatran. <i>Drug Safety</i> 2005;28(4):351-70.                                                                                                                                              | 926           | Intervention/Comparators |

| <b>Reference</b>                                                                                                                                                                                                                                                                                                   | <b>Ref ID</b> | <b>Reason</b>            |
|--------------------------------------------------------------------------------------------------------------------------------------------------------------------------------------------------------------------------------------------------------------------------------------------------------------------|---------------|--------------------------|
| Lehto M, Snapinn S, Dickstein K, Swedberg K, Nieminen MS. Prognostic risk of atrial fibrillation in acute myocardial infarction complicated by left ventricular dysfunction: The OPTIMAAL experience. <i>European Heart Journal</i> 2005;26(4):350-6.                                                              | 931           | Study Population         |
| Lekieffre J, Lacroix D, Klug D, Kacet S. [Thromboembolic complications of arrhythmia due to atrial fibrillation]. <i>Arch Mal Coeur Vaiss</i> 1994 Sep;87 Spec No 3:17-23.                                                                                                                                         | 468           | Study Design             |
| Lenz TL, Foral PA, Malesker MA, Hunter CB, Hilleman DE. Impact of nesiritide on health care resource utilization and complications in patients with decompensated heart failure. <i>Pharmacotherapy</i> 2004;24(9):1137-46.                                                                                        | 945           | Study Population         |
| Leschke M, Klimek W. How should anticoagulant therapy in recurrent ischemia and hemorrhagic stroke be performed? <i>Deutsche Medizinische Wochenschrift</i> 2003;128(42):2213.                                                                                                                                     | 973           | Study Design             |
| Levi M. Safety of prohemostatic interventions. <i>Seminars in Thrombosis and Hemostasis</i> 2012;38(3):292-8.                                                                                                                                                                                                      | 598           | Study Design             |
| Levine MN, Raskob G, Beyth RJ, Kearon C, Schulman S. Hemorrhagic complications of anticoagulant treatment: The Seventh ACCP Conference on Antithrombotic and Thrombolytic Therapy. <i>Chest</i> 2004;126(3 SUPPL.):287S-310S.                                                                                      | 948           | Study Design             |
| Levine MN, Raskob G, Landefeld S, Kearon C. Hemorrhagic complications of anticoagulant treatment. <i>Chest</i> 2001;119(1 SUPPL.):108S-21S.                                                                                                                                                                        | 1052          | Study Design             |
| Levosimendan: A new dual-acting, non-arrhythmogenic drug in decompensated congestive heart failure. <i>Drugs and Therapy Perspectives</i> 2001;17(20):1-5.                                                                                                                                                         | 1036          | Study Population         |
| Levy DE, Del Zoppo GJ, Demaerschalk BM, Demchuk AM, Diener HC, Howard G, et al. Ancrod in acute ischemic stroke: Results of 500 subjects beginning treatment within 6 hours of stroke onset in the ancrod stroke program. <i>Stroke</i> 2009;40(12):3796-803.                                                      | 779           | Intervention/Comparators |
| Levy JH, Sniecinski RM. Prohemostatic treatment in cardiac surgery. <i>Seminars in Thrombosis and Hemostasis</i> 2012;38(3):237-43.                                                                                                                                                                                | 599           | Study Design             |
| Levy JH. Novel concepts in treatment and prevention of bleeding. <i>Anesthesia and Analgesia</i> 2005;100(3 SUPPL.):43-7.                                                                                                                                                                                          | 930           | Study Design             |
| Levy T, Walker S, Mason M, Spurrell P, Rex S, Brant S, et al. Importance of rate control or rate regulation for improving exercise capacity and quality of life in patients with permanent atrial fibrillation and normal left ventricular function: A randomised controlled study. <i>Heart</i> 2001;85(2):171-8. | 1034          | Intervention/Comparators |
| Leys D. Prevention of cerebral ischaemia: Antiplatelet agents. <i>Revue Neurologique</i> 1999;155(9):688-93.                                                                                                                                                                                                       | 1079          | Study Design             |
| Leys D. Stroke prevention: Research with changes practice. <i>Journal of Neurology</i> 2009;256:S3.                                                                                                                                                                                                                | 800           | Study Design             |
| Li YS. Prevention of ischemic stroke by apixaban in patients with atrial fibrillation. <i>Chinese Journal of New Drugs</i> 2012;21(11):1220-3.                                                                                                                                                                     | 592           | Intervention/Comparators |
| Li Z, Seeram NP, Carpenter CL, Thames G, Minutti C, Bowerman S. Cranberry does not affect prothrombin time in male subjects on warfarin. <i>J Am Diet Assoc</i> 2006 Dec;106(12):2057-61.                                                                                                                          | 249           | Intervention/Comparators |
| Liakishev AA. [Dabigatran versus Warfarin in patients with atrial fibrillation. Results of the RE-LY study]. <i>Kardiologija</i> 2009;49(10):75-6.                                                                                                                                                                 | 168           | Intervention/Comparators |

| <b>Reference</b>                                                                                                                                                                                                                                                                                                                                                                          | <b>Ref ID</b> | <b>Reason</b>            |
|-------------------------------------------------------------------------------------------------------------------------------------------------------------------------------------------------------------------------------------------------------------------------------------------------------------------------------------------------------------------------------------------|---------------|--------------------------|
| Liakishev AA. [Long-term treatment of patients with atrial fibrillation. Results of AFFIRM]. <i>Kardiologiia</i> 2003;43(6):73.                                                                                                                                                                                                                                                           | 329           | Intervention/Comparators |
| Liddle RA, Toskes PP, Horrow J, Ghali J, Dachman A, Stong D. Lack of trophic pancreatic effects in humans with long-term administration of ximelagatran. <i>Pancreas</i> 2006 Mar;32(2):205-10.                                                                                                                                                                                           | 265           | Intervention/Comparators |
| Lidell C, Svedberg LE, Lindell P, Bandh S, Job B, Wallentin L. Clopidogrel and warfarin: absence of interaction in patients receiving long-term anticoagulant therapy for non-valvular atrial fibrillation. <i>Thromb Haemost</i> 2003 May;89(5):842-6.                                                                                                                                   | 340           | Intervention/Comparators |
| Liesenfeld KH, Lehr T, Dansirikul C, Reilly PA, Connolly SJ, Ezekowitz MD, et al. Population pharmacokinetic analysis of the oral thrombin inhibitor dabigatran etexilate in patients with non-valvular atrial fibrillation from the RE-LY trial. <i>J Thromb Haemost</i> 2011 Nov;9(11):2168-75.                                                                                         | 79            | Study Design             |
| Limone B, Baker WL, Roberts M, Coleman CI. Systematic review of cost-effectiveness models for pharmacologic stroke prevention in atrial fibrillation. <i>Value in Health</i> 2012;15(7):A370-A371.                                                                                                                                                                                        | 542           | Study Design             |
| Lin JM, Lin JL, Lai LP, Tseng YZ, Stephen Huang SK. Predictors of clinical recurrence after successful electrical cardioversion of chronic persistent atrial fibrillation: Clinical and electrophysiological observations. <i>Cardiology</i> 2002;97(3):133-7.                                                                                                                            | 1015          | Study Design             |
| Lind SE, Pearce LA, Feinberg WM, Bovill EG. Clinically significant differences in the International Normalized Ratio measured with reagents of different sensitivities. <i>Blood Coagulation and Fibrinolysis</i> 1999;10(5):215-27.                                                                                                                                                      | 1084          | Study Design             |
| Lindholm CJA, Fredholm O, Moller SJ, Edvardsson N, Kronvall T, Pettersson T, et al. Sinus rhythm maintenance following DC cardioversion of atrial fibrillation is not improved by temporary precardioversion treatment with oral verapamil. <i>Heart</i> 2004;90(5):534-8.                                                                                                                | 960           | Intervention/Comparators |
| Lip GY, Frison L, Grind M. Angiotensin converting enzyme inhibitor and angiotensin receptor blockade use in relation to outcomes in anticoagulated patients with atrial fibrillation. <i>J Intern Med</i> 2007 Jun;261(6):577-86.                                                                                                                                                         | 229           | Intervention/Comparators |
| Lip GY, Frison L, Grind M. Effect of hypertension on anticoagulated patients with atrial fibrillation. <i>Eur Heart J</i> 2007 Mar;28(6):752-9.                                                                                                                                                                                                                                           | 239           | Study Design             |
| Lip GY, Frison L, Grind M. Stroke event rates in anticoagulated patients with paroxysmal atrial fibrillation. <i>J Intern Med</i> 2008 Jul;264(1):50-61.                                                                                                                                                                                                                                  | 208           | Study Design             |
| Lip GY, Frison L, Halperin JL, Lane DA. Comparative validation of a novel risk score for predicting bleeding risk in anticoagulated patients with atrial fibrillation: the HAS-BLED (Hypertension, Abnormal Renal/Liver Function, Stroke, Bleeding History or Predisposition, Labile INR, Elderly, Drugs/Alcohol Concomitantly) score. <i>J Am Coll Cardiol</i> 2011 Jan 11;57(2):173-80. | 134           | Study Design             |
| Lip GY, Frison L, Halperin JL, Lane DA. Identifying patients at high risk for stroke despite anticoagulation: a comparison of contemporary stroke risk stratification schemes in an anticoagulated atrial fibrillation cohort. <i>Stroke</i> 2010 Dec;41(12):2731-8.                                                                                                                      | 138           | Study Design             |
| Lip GY, Lip PL, Zarifis J, Watson RD, Bareford D, Lowe GD, et al. Fibrin D-dimer and beta-thromboglobulin as markers of thrombogenesis and platelet activation in atrial fibrillation. Effects of introducing ultra-low-dose warfarin and aspirin. <i>Circulation</i> 1996 Aug 1;94(3):425-31.                                                                                            | 449           | Study Design             |

| <b>Reference</b>                                                                                                                                                                                                                                                                                                                                                                                                                                                                                                                                 | <b>Ref ID</b> | <b>Reason</b>            |
|--------------------------------------------------------------------------------------------------------------------------------------------------------------------------------------------------------------------------------------------------------------------------------------------------------------------------------------------------------------------------------------------------------------------------------------------------------------------------------------------------------------------------------------------------|---------------|--------------------------|
| Lip GY, Lowe GD, Rumley A, Dunn FG. Increased markers of thrombogenesis in chronic atrial fibrillation: effects of warfarin treatment. <i>Br Heart J</i> 1995 Jun;73(6):527-33.                                                                                                                                                                                                                                                                                                                                                                  | 462           | Study Design             |
| Lip GY, Pearce LA, Chin BS, Conway DS, Hart RG. Effects of congestive heart failure on plasma von Willebrand factor and soluble P-selectin concentrations in patients with non-valvar atrial fibrillation. <i>Heart</i> 2005 Jun;91(6):759-63.                                                                                                                                                                                                                                                                                                   | 293           | Study Design             |
| Lip GY, Rasmussen LH, Olsson SB, Jensen EC, Persson AL, Eriksson U, et al. Oral direct thrombin inhibitor AZD0837 for the prevention of stroke and systemic embolism in patients with non-valvular atrial fibrillation: a randomized dose-guiding, safety, and tolerability study of four doses of AZD0837 vs. vitamin K antagonists. <i>Eur Heart J</i> 2009 Dec;30(23):2897-907.                                                                                                                                                               | 176           | Intervention/Comparators |
| Lip GY, Rasmussen LH, Olsson SB, Zetterstrand S, Stahre C, Bylock A, et al. Oral direct thrombin inhibitor AZD0837 for the prevention of stroke and systemic embolism in patients with non-valvular atrial fibrillation: a Phase II study of AZD0837 in patients who are appropriate for but unable or unwilling to take vitamin K antagonist therapy. <i>Thromb Res</i> 2011 Feb;127(2):91-9.                                                                                                                                                   | 125           | Intervention/Comparators |
| Lip GY. The role of aspirin for stroke prevention in atrial fibrillation. <i>Nat Rev Cardiol</i> 2011 Oct;8(10):602-6.                                                                                                                                                                                                                                                                                                                                                                                                                           | 95            | Study Design             |
| Lip GYH, Gibbs CR. Anticoagulation for heart failure in sinus rhythm: A Cochrane systematic review. <i>QJM - Monthly Journal of the Association of Physicians</i> 2002;95(7):451-9.                                                                                                                                                                                                                                                                                                                                                              | 1011          | Study Population         |
| Lip GYH, Halperin JL, Petersen P, Rodgers GM, Renfurm RW. Safety and tolerability of the oral factor Xa inhibitor, YM150 vs. warfarin in 1297 patients with nonvalvular atrial fibrillation: A dose confirmation study (OPAL-2). <i>Journal of Thrombosis and Haemostasis</i> 2011;9:748.                                                                                                                                                                                                                                                        | 680           | Intervention/Comparators |
| Lip GYH, Huber K, Andreotti F, Arnesen H, Airaksinen KJ, Cuisset T, et al. Management of antithrombotic therapy in atrial fibrillation patients presenting with acute coronary syndrome and/or undergoing percutaneous coronary intervention/ stenting: A consensus document of the European Society of Cardiology Working Group on thrombosis, endorsed by the European Heart Rhythm Association [EHRA] and the European Association of Percutaneous Cardiovascular Interventions [EAPCI]. <i>Thrombosis and Haemostasis</i> 2010;103(1):13-28. | 775           | Study Design             |
| Lip GYH, Olsson B, Rasmussen LH, Tveit A, Jensen E, Eriksson UG, et al. Exposure dependent effects on coagulation assays by the oral direct thrombin inhibitor AZD0837 in patients with atrial fibrillation. Results from two phase II studies. <i>Journal of Thrombosis and Haemostasis</i> 2009;7(S2):684-5.                                                                                                                                                                                                                                   | 793           | Intervention/Comparators |
| Lip GYH, Ponikowski P, Andreotti F, Anker SD, Filippatos G, Homma S, et al. Thromboembolism and antithrombotic therapy for heart failure in sinus rhythm: An executive summary# of a joint consensus document from the ESC heart failure association and the esc working group on thrombosis. <i>Thrombosis and Haemostasis</i> 2012;108(6):1009-22.                                                                                                                                                                                             | 520           | Study Design             |
| Lip GYH, Rumley A, Dunn FG, Lowe GDO. Plasma fibrinogen and fibrin D-dimer in patients with atrial fibrillation: Effects of cardioversion to sinus rhythm. <i>International Journal of Cardiology</i> 1995;51(3):245-51.                                                                                                                                                                                                                                                                                                                         | 1131          | Study Design             |
| Lip GYH. A randomised controlled trial of warfarin versus aspirin for stroke prevention in the management of atrial fibrillation in an elderly (aged > 75) primary care population. <i>National Research Register Issue 1</i> 2001.                                                                                                                                                                                                                                                                                                              | 1191          | Study Design             |

| <b>Reference</b>                                                                                                                                                                                                                                                              | <b>Ref ID</b> | <b>Reason</b>            |
|-------------------------------------------------------------------------------------------------------------------------------------------------------------------------------------------------------------------------------------------------------------------------------|---------------|--------------------------|
| Lip GYH. Thromboprophylaxis for atrial fibrillation. <i>Lancet</i> 1999;353(9146):4-6.                                                                                                                                                                                        | 1092          | Study Design             |
| Lip-Gregory YH, Felmeden DC, Dwivedi G. Antiplatelet agents and anticoagulants for hypertension. <i>Cochrane Database of Systematic Reviews</i> 2011.                                                                                                                         | 1166          | Study Population         |
| Lip-Gregory YH, Wrigley BJ, Pisters R. Anticoagulation versus placebo for heart failure in sinus rhythm. <i>Cochrane Database of Systematic Reviews</i> 2012.                                                                                                                 | 1167          | Study Population         |
| Lip-Gregory YH, Wrigley BJ, Pisters R. Antiplatelet agents versus control or anticoagulation for heart failure in sinus rhythm. <i>Cochrane Database of Systematic Reviews</i> 2000.                                                                                          | 1172          | Study Population         |
| Lipman T, Murtagh MJ, Thomson R. How research-conscious GPs make decisions about anticoagulation in patients with atrial fibrillation: a qualitative study. <i>Fam Pract</i> 2004 Jun;21(3):290-8.                                                                            | 315           | Study Population         |
| Lippi G, Favaloro EJ, Franchini M. Paradoxical thrombosis, part 2: Anticoagulant and antiplatelet therapy. <i>Journal of Thrombosis and Thrombolysis</i> 2012;34(3):367-73.                                                                                                   | 556           | Study Design             |
| Liptak J. [Rivaroxaban versus warfarin: results of the ROCKET study]. <i>Ideggyogy Sz</i> 2012 Sep 30;65(9-10):349-51.                                                                                                                                                        | 16            | Study Design             |
| Li-Saw-Hee FL, Blann AD, Lip GY. Effects of fixed low-dose warfarin, aspirin-warfarin combination therapy, and dose-adjusted warfarin on thrombogenesis in chronic atrial fibrillation. <i>Stroke</i> 2000 Apr;31(4):828-33.                                                  | 381           | Intervention/Comparators |
| Little SH, Massel DR. Antiplatelet and anticoagulation for patients with prosthetic heart valves. <i>Cochrane Database of Systematic Reviews</i> 2003.                                                                                                                        | 1171          | Study Population         |
| Liu Y, Wu HM. Evidence-based treatment for a patient with ischemic stroke accompanied by hypertension and atrial fibrillation. <i>Chinese Journal of Evidence-Based Medicine</i> 2008;8(1):51-4.                                                                              | 847           | Study Population         |
| Lizotte A, Quessy I, Vanier MC, Martineau J, Caron S, Darveau M, et al. Reliability, validity and ease of use of a portable point-of-care coagulation device in a pharmacist-managed anticoagulation clinic. <i>Journal of Thrombosis and Thrombolysis</i> 2002;14(3):247-54. | 1004          | Intervention/Comparators |
| Loebstein R, Vecsler M, Kurnik D, Austerweil N, Gak E, Halkin H, et al. Common genetic variants of microsomal epoxide hydrolase affect warfarin dose requirements beyond the effect of cytochrome P450 2C9. <i>Clinical Pharmacology and Therapeutics</i> 2005;77(5):365-72.  | 927           | Study Design             |
| Loewen P, Dahri K. Risk of bleeding with oral anticoagulants: An updated systematic review and performance analysis of clinical prediction rules. <i>Annals of Hematology</i> 2011;90(10):1191-200.                                                                           | 664           | Study Design             |
| Lok NS, Lau CP, Tse HF, Ayers GM. Clinical shock tolerability and effect of different right atrial electrode locations on efficacy of low energy human transvenous atrial defibrillation using an implantable lead system. <i>J Am Coll Cardiol</i> 1997;30(5):1324-30.       | 1107          | Study Design             |
| Lomuscio A, Belletti S, Battezzati PM, Lombardi F. Efficacy of acupuncture in preventing atrial fibrillation recurrences after electrical cardioversion. <i>Journal of Cardiovascular Electrophysiology</i> 2011;22(3):241-7.                                                 | 712           | Intervention/Comparators |
| Loogen F, Risler T, Seipel L. [Prevention of embolism in mitral-valve lesions with anticoagulants. (Long-term observations on patients with and without discoumarol treatment)]. <i>Dtsch Med Wochenschr</i> 1972 Dec 1;97(48):1845-9.                                        | 506           | Study Population         |

| <b>Reference</b>                                                                                                                                                                                                                                                                           | <b>Ref ID</b> | <b>Reason</b>            |
|--------------------------------------------------------------------------------------------------------------------------------------------------------------------------------------------------------------------------------------------------------------------------------------------|---------------|--------------------------|
| Lopes RD, Alexander JH, Al-Khatib SM, Ansell J, Diaz R, Easton JD, et al. Apixaban for reduction in stroke and other Thromboembolic events in atrial fibrillation (ARISTOTLE) trial: design and rationale. <i>Am Heart J</i> 2010 Mar;159(3):331-9.                                        | 152           | Study Design             |
| Lopes RD, Elliott LE, White HD, Hochman JS, Van de Werf F, Ardissino D, et al. Antithrombotic therapy and outcomes of patients with atrial fibrillation following primary percutaneous coronary intervention: results from the APEX-AMI trial. <i>Eur Heart J</i> 2009 Aug;30(16):2019-28. | 183           | Study Population         |
| Lopes RD, Garcia DA. In people with atrial fibrillation unsuitable for warfarin, apixaban reduces the risk of stroke compared with aspirin, with no difference in major bleeding. <i>Evidence-Based Medicine</i> 2011;16(6):187-8.                                                         | 643           | Study Design             |
| Lorenzoni R, Lazzerini G, Cocci F, De CR. Short-term prevention of thromboembolic complications in patients with atrial fibrillation with aspirin plus clopidogrel: the Clopidogrel-Aspirin Atrial Fibrillation (CLAAF) pilot study. <i>Am Heart J</i> 2004 Jul;148(1):e6.                 | 310           | Study Design             |
| Lovelock CE, Knibb JA, Rothwell PM. Use of antithrombotic drugs in patients with atrial fibrillation and microbleeds: A decision-analysis. <i>Cerebrovascular Diseases</i> 2011;31:70-1.                                                                                                   | 697           | Intervention/Comparators |
| Low dose aspirin: Still affects GI tract. <i>Medicine Today</i> 2001;2(2):8.                                                                                                                                                                                                               | 1050          | Study Design             |
| Lutsep HL. Recent Clinical Trials of Antiplatelet Therapy in Secondary Stroke Prevention: Expectations and Results for Application in Primary Care Settings. <i>American Journal of Medicine</i> 2009;122(4 SUPPL. 2):S21-S31.                                                             | 809           | Study Design             |
| MacDonald LA, Meyers S, Bennett CL, Fintel D, Grosshans N, Syegco R, et al. Post-cardiac catheterization access site complications and low-molecular-weight heparin following cardiac catheterization. <i>Journal of Invasive Cardiology</i> 2003;15(2):60-2.                              | 1000          | Intervention/Comparators |
| MacWalter RS. Secondary prevention of stroke. <i>Thrombosis and Haemostasis</i> 1999;82(SUPPL. 1):95-103.                                                                                                                                                                                  | 1077          | Study Design             |
| Maeda K, Sakai T, Hira K, Sato TS, Bito S, Asai A, et al. Physicians' attitudes toward anticoagulant therapy in patients with chronic atrial fibrillation. <i>Internal Medicine</i> 2004;43(7):553-60.                                                                                     | 953           | Study Population         |
| Mahan CE, Liu Y, Douketis JD, Turpie AGG, Dairkee U, Spyropoulos AC. Venous thromboembolism validation study of the IMPROVE risk assessment models in the medical patient (VTE-VALOURR). <i>Blood</i> 2011;118(21).                                                                        | 651           | Study Population         |
| Mahe I, Drouet L, Simoneau G, Minh-Muzeaux S, Caulin C, Bergmann JF. D-dimer can predict survival in patients with chronic atrial fibrillation. <i>Blood Coagulation and Fibrinolysis</i> 2004;15(5):413-7.                                                                                | 955           | Study Design             |
| Mahtani KR, Heneghan CJ, Nunan D, Bankhead C, Keeling D, Ward AM, et al. Optimal loading dose of warfarin for the initiation of oral anticoagulation. <i>Cochrane Database of Systematic Reviews</i> 2012.                                                                                 | 1175          | Intervention/Comparators |
| Majeed A, Moser K, Carroll K. Trends in the prevalence and management of atrial fibrillation in general practice in England and Wales, 1994-1998: analysis of data from the general practice research database. <i>Heart</i> 2001 Sep;86(3):284-8.                                         | 371           | Study Design             |



| Reference                                                                                                                                                                                                                                                                                                                                                                              | Ref ID | Reason                   |
|----------------------------------------------------------------------------------------------------------------------------------------------------------------------------------------------------------------------------------------------------------------------------------------------------------------------------------------------------------------------------------------|--------|--------------------------|
| Makhija Z, Allen MS, Wigle DA, Shen KR, Cassivi SD, Nichols FC, III, et al. Routine anticoagulation is not indicated for postoperative general thoracic surgical patients with new-onset atrial fibrillation. <i>Ann Thorac Surg</i> 2011 Aug;92(2):421-6.                                                                                                                             | 93     | Study Design             |
| Manning WJ, Silverman DI, Keighley CS, Oettgen P, Douglas PS. Transesophageal echocardiographically facilitated early cardioversion from atrial fibrillation using short-term anticoagulation: Final results of a prospective 4.5-year study. <i>J Am Coll Cardiol</i> 1995;25(6):1354-61.                                                                                             | 1136   | Intervention/Comparators |
| Manotti C, Moia M, Palareti G, Pengo V, Ria L, Dettori AG. Effect of computer-aided management on the quality of treatment in anticoagulated patients: A prospective, randomized, multicenter trial of APROAT (Automated Program for Oral Anticoagulant Treatment). <i>Haematologica</i> 2001;86(10):1060-70.                                                                          | 1033   | Intervention/Comparators |
| Man-Son-Hing M, Gage BF, Montgomery AA, Howitt A, Thomson R, Devereaux PJ, et al. Preference-based antithrombotic therapy in atrial fibrillation: implications for clinical decision making. <i>Med Decis Making</i> 2005 Sep;25(5):548-59.                                                                                                                                            | 280    | Intervention/Comparators |
| Man-Son-Hing M, Laupacis A, O'Connor A, Wells G, Lemelin J, Wood W, et al. Warfarin for atrial fibrillation. The patient's perspective. <i>Arch Intern Med</i> 1996 Sep 9;156(16):1841-8.                                                                                                                                                                                              | 446    | Study Design             |
| Man-Son-Hing M, Laupacis A, O'Connor AM, Biggs J, Drake E, Yetisir E, et al. A patient decision aid regarding antithrombotic therapy for stroke prevention in atrial fibrillation: a randomized controlled trial. <i>JAMA</i> 1999 Aug 25;282(8):737-43.                                                                                                                               | 420    | Intervention/Comparators |
| Man-Son-Hing M, Laupacis A. Anticoagulant-related bleeding in older persons with atrial fibrillation: physicians' fears often unfounded. <i>Arch Intern Med</i> 2003 Jul 14;163(13):1580-6.                                                                                                                                                                                            | 333    | Study Design             |
| Man-Son-Hing M, O'Connor AM, Drake E, Biggs J, Hum V, Laupacis A. The effect of qualitative vs. quantitative presentation of probability estimates on patient decision-making: a randomized trial. <i>Health Expect</i> 2002 Sep;5(3):246-55.                                                                                                                                          | 354    | Intervention/Comparators |
| Mant J, Hobbs R, Fitzmaurice D, Lip G, Fletcher K, Roalfe A, et al. BAFTA: a randomised controlled trial of warfarin versus aspirin for stroke prevention in atrial fibrillation in a primary care population aged over 75. <i>Cerebrovascular Diseases</i> 2007;23:10.                                                                                                                | 1192   | Study Design             |
| Mant JW, Richards SH, Hobbs FD, Fitzmaurice D, Lip GY, Murray E, et al. Protocol for Birmingham Atrial Fibrillation Treatment of the Aged study (BAFTA): a randomised controlled trial of warfarin versus aspirin for stroke prevention in the management of atrial fibrillation in an elderly primary care population [ISRCTN89345269]. <i>BMC Cardiovasc Disord</i> 2003 Aug 26;3:9. | 331    | Study Design             |
| Mantha S, Cabral K, Ansell J. New avenues for anticoagulation in atrial fibrillation. <i>Clinical Pharmacology and Therapeutics</i> 2013;93(1):68-77.                                                                                                                                                                                                                                  | 516    | Study Design             |
| Mantha S, Roizen MF, Barnard J, Thisted RA, Ellis JE, Foss J. Relative effectiveness of four preoperative tests for predicting adverse cardiac outcomes after vascular surgery: A meta-analysis. <i>Anesthesia and Analgesia</i> 1994;79(3):422-33.                                                                                                                                    | 1142   | Study Design             |
| Marin F, Roldan V, Climent VE, Ibanez A, Garcia A, Marco P, et al. Plasma von Willebrand factor, soluble thrombomodulin, and fibrin D-dimer concentrations in acute onset non-rheumatic atrial fibrillation. <i>Heart</i> 2004;90(10):1162-6.                                                                                                                                          | 943    | Study Design             |

| Reference                                                                                                                                                                                                                                                                                                    | Ref ID | Reason                   |
|--------------------------------------------------------------------------------------------------------------------------------------------------------------------------------------------------------------------------------------------------------------------------------------------------------------|--------|--------------------------|
| Marrouche NF, Brachmann J. Catheter ablation versus standard conventional treatment in patients with left ventricular dysfunction and atrial fibrillation (CASTLE-AF) - Study design. <i>PACE - Pacing and Clinical Electrophysiology</i> 2009;32(8):987-94.                                                 | 788    | Study Design             |
| Marshall S, Fearon P, Dawson J, Quinn TJ. Stop the clots, but at what cost? Pharmacoeconomics of dabigatran etexilate for the prevention of stroke in subjects with atrial fibrillation: a systematic literature review. <i>Expert Rev Pharmacoecon Outcomes Res</i> 2013 Feb;13(1):29-42.                   | 4      | Study Design             |
| Marty T, Hurni R, Zoller M, Steiger U, Steurer J, Eichler K. [Anticoagulation in atrial fibrillation--status of therapy in a network of physicians]. <i>Praxis (Bern 1994 )</i> 2003 Apr 23;92(17):801-8.                                                                                                    | 338    | Intervention/Comparators |
| Masotti L, Di Napoli M, Ageno W, Imberti D, Godoy D, Panigada G, et al. Efficacy and safety of new oral anticoagulants compared with warfarin in cardioembolic prophylaxis of patients with non valvular atrial fibrillation. More lights than shadows. <i>Italian Journal of Medicine</i> 2012;6(3):153-69. | 560    | Study Design             |
| Matchar DB, Jacobson A, Dolor R, Edson R, Uyeda L, Pibbs CS, et al. Effect of home testing of international normalized ratio on clinical events. <i>N Engl J Med</i> 2010 Oct 21;363(17):1608-20.                                                                                                            | 139    | Study Population         |
| Matchar DB, Jacobson AK, Edson RG, Lavori PW, Ansell JE, Ezekowitz MD, et al. The impact of patient self-testing of prothrombin time for managing anticoagulation: rationale and design of VA Cooperative Study #481--the Home INR Study (THINRS). <i>J Thromb Thrombolysis</i> 2005 Jun;19(3):163-72.       | 282    | Study Design             |
| Matchar DB, McCrory DC, Barnett HJ, Feussner JR. Medical treatment for stroke prevention. <i>Ann Intern Med</i> 1994 Jul 1;121(1):41-53.                                                                                                                                                                     | 470    | Study Population         |
| Matchar DB, Samsa GP, Cohen SJ, Oddone EZ, Jurgelski AE. Improving the quality of anticoagulation of patients with atrial fibrillation in managed care organizations: results of the managing anticoagulation services trial. <i>Am J Med</i> 2002 Jul;113(1):42-51.                                         | 358    | Intervention/Comparators |
| Matchar DB. Do anticoagulation management services improve care? Implications of the Managing Anticoagulation Services Trial. <i>Card Electrophysiol Rev</i> 2003 Dec;7(4):379-81.                                                                                                                           | 319    | Intervention/Comparators |
| Matchar DB. Weekly INR self-testing did not reduce stroke, major bleeding, or death more than monthly clinic testing. <i>Annals of Internal Medicine</i> 2011;154(2):JC1-13.                                                                                                                                 | 720    | Intervention/Comparators |
| Matsuo S, Nakamura Y, Kinoshita M. Warfarin reduces silent cerebral infarction in elderly patients with atrial fibrillation. <i>Coron Artery Dis</i> 1998;9(4):223-6.                                                                                                                                        | 436    | Intervention/Comparators |
| Matthews JC, Johnson ML, Koelling TM. The impact of patient-specific quality-of-care report cards on guideline adherence in heart failure. <i>Am Heart J</i> 2007 Dec;154(6):1174-83.                                                                                                                        | 215    | Study Population         |
| Mattle HP, Brainin M, Chamorro A, Diener HC, Hacke W, Leys D, et al. European stroke science workshop. <i>Cerebrovascular Diseases</i> 2012;34(2):95-105.                                                                                                                                                    | 568    | Study Design             |
| Mattle HP, Savitz SI. Advances in emerging therapies 2010. <i>Stroke</i> 2011;42(2):298-300.                                                                                                                                                                                                                 | 717    | Study Design             |
| McAlister FA, Man-Son-Hing M, Straus SE, Ghali WA, Anderson D, Majumdar SR, et al. Impact of a patient decision aid on care among patients with nonvalvular atrial fibrillation: A cluster randomized trial. <i>Canadian Medical Association Journal</i> 2005;173(5):496-501.                                | 917    | Intervention/Comparators |
| McComb JM. New results from trials in atrial fibrillation. <i>Cardiac Electrophysiology Review</i> 2001;5(2-3):209-16.                                                                                                                                                                                       | 1037   | Study Design             |

| <b>Reference</b>                                                                                                                                                                                                                                                                                                | <b>Ref ID</b> | <b>Reason</b>            |
|-----------------------------------------------------------------------------------------------------------------------------------------------------------------------------------------------------------------------------------------------------------------------------------------------------------------|---------------|--------------------------|
| McKenna C, Palmer S, Rodgers M, Chambers D, Hawkins N, Golder S, et al. Cost-effectiveness of radiofrequency catheter ablation for the treatment of atrial fibrillation in the United Kingdom. <i>Heart</i> 2009;95(7):542-9.                                                                                   | 807           | Study Design             |
| McKenna CJ, Galvin J, McCann HA, Sugrue DD. Risks of long-term oral anticoagulation in a non-trial medical environment. <i>Ir Med J</i> 1996 Jul;89(4):144-5.                                                                                                                                                   | 450           | Intervention/Comparators |
| McKinsey JF. Symptomatic Carotid Stenosis: Endarterectomy, Stenting, or Best Medical Management? <i>Seminars in Vascular Surgery</i> 2008;21(2):108-14.                                                                                                                                                         | 837           | Study Design             |
| McLellan CS, Abdollah H, Brennan FJ, Simpson CS. Atrial fibrillation in the pacemaker clinic. <i>Canadian Journal of Cardiology</i> 2003;19(5):492-4.                                                                                                                                                           | 996           | Study Design             |
| McMurray JJV, Connolly SJ, Hart R, Flaker G, Lopes RD, Wang J, et al. Effect of apixaban on all-cause mortality in atrial fibrillation: An imputed placebo analysis. <i>European Heart Journal</i> 2012;33:52.                                                                                                  | 574           | Intervention/Comparators |
| McNamara RL, Bass EB, Miller MR, Segal JB, Goodman SN, Kim NL, et al. Management of new onset atrial fibrillation. <i>Evid Rep Technol Assess (Summ )</i> 2000 May;(12):1-7.                                                                                                                                    | 372           | Study Design             |
| McNamara RL, Tamariz LJ, Segal JB, Bass EB, Joseph T. Review finds evidence to support pharmacological treatment in many areas of atrial fibrillation, but no strong evidence for one drug over another. <i>Evidence-based Cardiovascular Medicine</i> 2004;8(2):135-8.                                         | 958           | Study Design             |
| Mead GE, Wardlaw JM, Lewis SC, McDowall M, Dennis MS. The influence of randomized trials on the use of anticoagulants for atrial fibrillation. <i>Age Ageing</i> 1999 Sep;28(5):441-6.                                                                                                                          | 411           | Study Population         |
| Mearns BM. Atrial fibrillation: ARISTOTLE reveals superiority of apixaban over warfarin in patients with atrial fibrillation. <i>Nature Reviews Cardiology</i> 2011;8(11):607.                                                                                                                                  | 655           | Study Design             |
| Melandri G, Nanni S, Tricoci P, Melloni C, Semprini F, Fallani F, et al. Heparins: Their established role in acute coronary syndromes and perspectives in atrial fibrillation. <i>Haematologica</i> 2001;86(11 SUPPL. 2):54-7.                                                                                  | 1029          | Intervention/Comparators |
| Melina G, De RF, Gaer JA, Amrani M, Khaghani A, Yacoub MH. Mid-term pattern of survival, hemodynamic performance and rate of complications after medtronic freestyle versus homograft full aortic root replacement: results from a prospective randomized trial. <i>J Heart Valve Dis</i> 2004 Nov;13(6):972-5. | 299           | Intervention/Comparators |
| Menendez-Jandula B, Souto JC, Oliver A, Montserrat I, Quintana M, Gich I, et al. Comparing self-management of oral anticoagulant therapy with clinic management: A randomized trial. <i>Annals of Internal Medicine</i> 2005;142(1):1-10+I.                                                                     | 935           | Intervention/Comparators |
| Merli GJ, Tzanis G. Warfarin: What are the clinical implications of an out-of-range-therapeutic international normalized ratio? <i>Journal of Thrombosis and Thrombolysis</i> 2009;27(3):293-9.                                                                                                                 | 805           | Study Design             |
| Messori A, Maratea D, Fadda V, Trippoli S. Comparing new anticoagulants in atrial fibrillation using the number needed to treat. <i>European Journal of Internal Medicine</i> 2012.                                                                                                                             | 559           | Study Design             |
| Meyer BJ. [Anticoagulation and antiaggregation in cardiac patients]. <i>Ther Umsch</i> 2003 Jan;60(1):27-32.                                                                                                                                                                                                    | 344           | Study Design             |

| Reference                                                                                                                                                                                                                                            | Ref ID | Reason                   |
|------------------------------------------------------------------------------------------------------------------------------------------------------------------------------------------------------------------------------------------------------|--------|--------------------------|
| Middlekauff HR, Stevenson WG, Gornbein JA. Antiarrhythmic prophylaxis vs warfarin anticoagulation to prevent thromboembolic events among patients with atrial fibrillation. A decision analysis. Arch Intern Med 1995 May 8;155(9):913-20.           | 463    | Intervention/Comparators |
| Minuk LA, Chin-Yee BH, Louzada ML, Laudenbach L, Chin-Yee IH. The prevalence of cardiovascular risk factors in individuals with hemophilia. Blood 2011;118(21).                                                                                      | 650    | Study Population         |
| Mitka M. New alternative to warfarin may help reduce stroke risk in patients with AF. JAMA 2011 Jan 5;305(1):25-6.                                                                                                                                   | 123    | Study Design             |
| Mitka M. New anticoagulants offer options beyond warfarin to reduce stroke risk. JAMA - Journal of the American Medical Association 2012;308(17):1727-8.                                                                                             | 539    | Study Design             |
| Mitra R, Marciello MA, Brain C, Ahangar B, Burke DT. Efficacy of computer-aided dosing of warfarin among patients in a rehabilitation hospital. Am J Phys Med Rehabil 2005 Jun;84(6):423-7.                                                          | 292    | Intervention/Comparators |
| Mitsch R, Siemens HJ, Garbe M, Wagner T, Sheikhzadeh A, Diederich KW. Detection of a hypercoagulable state in nonvalvular atrial fibrillation and the effect of anticoagulant therapy. Thromb Haemost 1996 Feb;75(2):219-23.                         | 455    | Study Design             |
| Miyazaki S, Ito T, Suwa M, Nakamura T, Kobashi A, Kitauro Y. Role of transesophageal echocardiography in the prediction of thromboembolism in patients with chronic nonvalvular atrial fibrillation. Japanese Circulation Journal 2001;65(10):874-8. | 1031   | Study Design             |
| Mobius-Winkler S, Sandri M, Mangner N, Lurz P, Dahnert I, Schuler G. The WATCHMAN left atrial appendage closure device for atrial fibrillation. J Vis Exp 2012;(60).                                                                                 | 57     | Study Design             |
| Moher M, Lancaster T. Who needs antiplatelet therapy? British Journal of General Practice 1996;46(407):367-70.                                                                                                                                       | 1124   | Study Design             |
| Moia M. Antiplatelet treatment combined with old or new oral anticoagulant drugs: Need for an evidence-based approach. Hematology Reports 2011;3:10.                                                                                                 | 702    | Study Design             |
| Molckovsky D, Boucher M. Ximelagatran in prevention of cardiovascular events. Issues Emerg Health Technol 2004 Nov;(62):1-4.                                                                                                                         | 301    | Intervention/Comparators |
| Moll S. Monitoring of new anticoagulants. International Journal of Laboratory Hematology 2009;31:41-2.                                                                                                                                               | 799    | Study Design             |
| Montre F, Pousset F, Comets E, Plaud B, Diquet B, Montalescot G, et al. Population pharmacokinetic-pharmacodynamic analysis of fluindione in patients. Clinical Pharmacology and Therapeutics 1998;63(1):64-78.                                      | 1105   | Study Design             |
| Moore T. [Complicated priorities regarding antithrombotic treatment of atrial fibrillation. Difficult to understand priority list in the national guidelines--new studies can make them clearer]. Lakartidningen 2008 Sep 10;105(37):2472-3.         | 198    | Study Design             |
| Moriyasu H, Yasaka M, Oita J, Yamaguchi T. Warfarin therapy for secondary prevention of cardioembolic stroke with nonvalvular atrial fibrillation - A retrospective study. Clinical Neurology 1993;33(8):850-5.                                      | 1157   | Study Design             |
| Morley J, Marinchak R, Rials SJ, Kowey PR. Atrial fibrillation, anticoagulation, and stroke. American Journal of Cardiology 1996;77(3):38A-44A.                                                                                                      | 1126   | Study Design             |

| <b>Reference</b>                                                                                                                                                                                                                                                                                                                                | <b>Ref ID</b> | <b>Reason</b>            |
|-------------------------------------------------------------------------------------------------------------------------------------------------------------------------------------------------------------------------------------------------------------------------------------------------------------------------------------------------|---------------|--------------------------|
| Morocutti C, Amabile G, Fattapposta F, Nicolosi A, Matteoli S, Trappolini M, et al. Indobufen versus warfarin in the secondary prevention of major vascular events in nonrheumatic atrial fibrillation. SIFA (Studio Italiano Fibrillazione Atriale) Investigators. <i>Stroke</i> 1997 May;28(5):1015-21.                                       | 444           | Intervention/Comparators |
| Morocutti C, Amabile G, Fattapposta F, Nicolosi A, Matteoli S, Trappolini M, et al. Indobufen versus warfarin in the secondary prevention of major vascular events in nonrheumatic atrial fibrillation. <i>Stroke</i> 1997;28(5):1015-21.                                                                                                       | 1113          | Intervention/Comparators |
| Mozaffarian D, Marchioli R, Macchia A, Sillelta MG, Ferrazzi P, Gardner TJ, et al. Fish oil and postoperative atrial fibrillation: The omega-3 fatty acids for prevention of post-operative atrial fibrillation (OPERA) randomized trial. <i>JAMA - Journal of the American Medical Association</i> 2012;308(19):2001-11.                       | 529           | Intervention/Comparators |
| Mueck W, Lensing AW, Agnelli G, Decousus H, Prandoni P, Misselwitz F. Rivaroxaban: population pharmacokinetic analyses in patients treated for acute deep-vein thrombosis and exposure simulations in patients with atrial fibrillation treated for stroke prevention. <i>Clin Pharmacokinet</i> 2011 Oct;50(10):675-86.                        | 84            | Study Design             |
| Mujanovic E, Nurkic M, Caluk J, Terzic I, Kabil E, Bergsland J. The effect of combined clopidogrel and aspirin therapy after off-pump coronary surgery: A pilot study. <i>Innovations: Technology and Techniques in Cardiothoracic and Vascular Surgery</i> 2009;4(5):265-8.                                                                    | 785           | Study Design             |
| Mujib M, Rahman AAZ, Desai RV, Ahmed MI, Feller MA, Aban I, et al. Warfarin use and outcomes in patients with advanced chronic systolic heart failure without atrial fibrillation, prior thromboembolic events, or prosthetic valves. <i>American Journal of Cardiology</i> 2011;107(4):552-7.                                                  | 714           | Study Population         |
| Muller I, Massberg S, Zierhut W, Binz C, Schuster A, Rudiger-Von Hoch S, et al. Effects of aspirin and clopidogrel versus oral anticoagulation on platelet function and on coagulation in patients with nonvalvular atrial fibrillation (CLAFIB). <i>Pathophysiology of Haemostasis and Thrombosis</i> 2002;32(1):16-24.                        | 1002          | Intervention/Comparators |
| Murray KT, Rottman JN, Arbogast PG, Shemanski L, Primm RK, Campbell WB, et al. Inhibition of angiotensin II signaling and recurrence of atrial fibrillation in AFFIRM. <i>Heart Rhythm</i> 2004;1(6):669-75.                                                                                                                                    | 939           | Intervention/Comparators |
| Murray RD, Shah A, Jasper SE, Goodman A, Deitcher SR, Katz WE, et al. Transesophageal echocardiography guided enoxaparin antithrombotic strategy for cardioversion of atrial fibrillation: the ACUTE II pilot study. <i>Am Heart J</i> 2000 Jun;139(6):E1-E7.                                                                                   | 391           | Study Design             |
| Murtagh MJ, Thomson RG, May CR, Rapley T, Heaven BR, Graham RH, et al. Qualitative methods in a randomised controlled trial: the role of an integrated qualitative process evaluation in providing evidence to discontinue the intervention in one arm of a trial of a decision support tool. <i>Qual Saf Health Care</i> 2007 Jun;16(3):224-9. | 230           | Intervention/Comparators |
| Musat DL, Gaddam S, Mittal S, Arshad A, Preminger MW, Sichrovsky T, et al. Dabigatran vs. Warfarin Peri-ablation for Atrial Fibrillation: A Meta-analysis of Embolic and Bleeding Complications. <i>Circulation</i> 2012;126(21).                                                                                                               | 532           | Study Population         |

| Reference                                                                                                                                                                                                                                                                                         | Ref ID | Reason                   |
|---------------------------------------------------------------------------------------------------------------------------------------------------------------------------------------------------------------------------------------------------------------------------------------------------|--------|--------------------------|
| Muszkat M, Bialer O, Blotnick S, Adar L, Xie HG, Ufer M, et al. Effects of folic acid supplementation on the pharmacokinetics and anticoagulant effect of warfarin: An open-label, prospective study of long-term administration in adults. <i>Clinical Therapeutics</i> 2010;32(2):347-56.       | 772    | Intervention/Comparators |
| Muszkat M, Blotnik S, Elami A, Krasilnikov I, Caraco Y. Warfarin metabolism and anticoagulant effect: A prospective, observational study of the impact of CYP2C9 genetic polymorphism in the presence of drug-disease and drug-drug interactions. <i>Clinical Therapeutics</i> 2007;29(3):427-37. | 869    | Study Design             |
| Nabavi DG, Allroggen A, Reinecke H, Kemeny V, Droste DW, Breithardt G, et al. Absence of circulating microemboli in patients with atrial fibrillation undergoing electric cardioversion. <i>Cerebrovascular Diseases</i> 2001;11(2):95-9.                                                         | 1049   | Intervention/Comparators |
| Naccarelli GV, Dorian P, Hohnloser SH, Coumel P. Prospective comparison of flecainide versus quinidine for the treatment of paroxysmal atrial fibrillation/flutter. <i>American Journal of Cardiology</i> 1996;77(3):53A-9A.                                                                      | 1128   | Intervention/Comparators |
| Naccarelli GV, Johnston SS, Lin J, Patel PP, Schulman KL. Cost burden of cardiovascular hospitalization and mortality in ATHENA-like patients with atrial fibrillation/atrial flutter in the United States. <i>Clinical Cardiology</i> 2010;33(5):270-9.                                          | 762    | Study Design             |
| Nagarakanti R, Ellis CR. Dabigatran in clinical practice. <i>Clin Ther</i> 2012 Oct;34(10):2051-60.                                                                                                                                                                                               | 23     | Study Design             |
| Nagarakanti R, Ezekowitz MD, Oldgren J, Yang S, Chernick M, Aikens TH, et al. Dabigatran versus warfarin in patients with atrial fibrillation: an analysis of patients undergoing cardioversion. <i>Circulation</i> 2011 Jan 18;123(2):131-6.                                                     | 124    | Intervention/Comparators |
| Naglie IG, Detsky AS. Treatment of chronic nonvalvular atrial fibrillation in the elderly: a decision analysis. <i>Med Decis Making</i> 1992 Oct;12(4):239-49.                                                                                                                                    | 485    | Study Design             |
| Nair CK, Holmberg MJ, Aronow WS, Shen X, Li H, Lakkireddy D. Thromboembolism in patients with atrial fibrillation with and without left atrial thrombus documented by transesophageal echocardiography. <i>Am J Ther</i> 2009 Sep;16(5):385-92.                                                   | 161    | Study Population         |
| Namazi MH, Yousefi ZK, Shirazi MG, Shaykholeslami M, Vakili H, Moatamedi MR, et al. Comparison of the clinical efficacy of three brands of warfarin. <i>Indian Journal of Pharmacology</i> 2004;36(6):360-2.                                                                                      | 940    | Intervention/Comparators |
| Natterson PD, Stevenson WG, Saxon LA, Middlekauff HR, Stevenson LW. Risk of arterial embolization in 224 patients awaiting cardiac transplantation. <i>American Heart Journal</i> 1995;129(3):564-70.                                                                                             | 1139   | Study Design             |
| Naunton M. Internal medicine. <i>Journal of Pharmacy Practice and Research</i> 2012;42(2):159-60.                                                                                                                                                                                                 | 595    | Study Design             |
| Nedeltchev K. Critique of apixaban versus warfarin in patients with atrial fibrillation. <i>Stroke</i> 2012 Mar;43(3):922-3.                                                                                                                                                                      | 63     | Study Design             |
| Negi S, Shukrullah I, Veledar E, Bloom HL, Jones DP, Dudley SC. Statin therapy for the prevention of atrial fibrillation trial (SToP AF trial). <i>Journal of Cardiovascular Electrophysiology</i> 2011;22(4):414-9.                                                                              | 709    | Intervention/Comparators |
| Neilson RF. Warfarin: is the end nigh? Please? <i>J R Coll Physicians Edinb</i> 2010 Sep;40(3):222-3.                                                                                                                                                                                             | 132    | Study Design             |
| Neubeck M. Stroke and systemic embolism in atrial fibrillation: Increased bleeding risk due to idraparinux. <i>Arzneimitteltherapie</i> 2008;26(7):259-60.                                                                                                                                        | 836    | Intervention/Comparators |

| <b>Reference</b>                                                                                                                                                                                                                                                                                                                                                                    | <b>Ref ID</b> | <b>Reason</b>            |
|-------------------------------------------------------------------------------------------------------------------------------------------------------------------------------------------------------------------------------------------------------------------------------------------------------------------------------------------------------------------------------------|---------------|--------------------------|
| Neutel JM, Smith DHG. A randomized crossover study to compare the efficacy and tolerability of Barr warfarin sodium to the currently available Coumadin(registered trademark). Cardiovascular Reviews and Reports 1998;19(2):49-59.                                                                                                                                                 | 1104          | Intervention/Comparators |
| New insights and results from the RE-LY trial. Cardiovasc J Afr 2011 Sep;22(5):284-6.                                                                                                                                                                                                                                                                                               | 77            | Study Design             |
| Ngian GS, Stevens W, Prior D, Gabbay E, Roddy J, Tran A, et al. Predictors of mortality in connective tissue disease-associated pulmonary arterial hypertension: a cohort study. Arthritis Research and Therapy 2012;14(5).                                                                                                                                                         | 553           | Study Population         |
| Nieuwlaat R, Barker L, Kim YK, Haynes RB, Eikelboom JW, Yusuf S, et al. Underuse of evidence-based warfarin dosing methods for atrial fibrillation patients. Thromb Res 2010 Apr;125(4):e128-e131.                                                                                                                                                                                  | 162           | Study Design             |
| Nieuwlaat R, Connolly BJ, Hubers LM, Cuddy SM, Eikelboom JW, Yusuf S, et al. Quality of individual INR control and the risk of stroke and bleeding events in atrial fibrillation patients: a nested case control analysis of the ACTIVE W study. Thromb Res 2012 Jun;129(6):715-9.                                                                                                  | 82            | Study Design             |
| Nieuwlaat R, Haynes R, Duffy C, Reilly PA, Themeles E, Morillo CA, et al. Cluster randomized controlled trial to test the effect of computer-generated individualized audit and feedback to patients and physicians on clinical outcomes in atrial fibrillation patients participating in a large multi-center trial of dabigatran. Canadian Journal of Cardiology 2012;28(5):S417. | 638           | Intervention/Comparators |
| Nieuwlaat R, Haynes RB, Duffy C, Reilly PA, Themeles E, Morillo CA, et al. Cluster randomized controlled trial to test the effect of a multifaceted comprehensive cardiovascular care intervention on clinical outcomes in atrial fibrillation patients receiving dabigatran. Circulation 2012;126(21).                                                                             | 531           | Intervention/Comparators |
| Nieuwlaat R, Hubers LM, Spyropoulos AC, Eikelboom JW, Connolly BJ, Van Spall HGC, et al. Randomised comparison of a simple warfarin dosing algorithm versus a computerised anticoagulation management system for control of warfarin maintenance therapy. Thrombosis and Haemostasis 2012;108(6):1228-35.                                                                           | 524           | Intervention/Comparators |
| Nikolaou VS, Harwood PJ, Karadimas EJ, Tan HB, Giannoudis PV. Novel anticoagulants: New evidence for emerging drugs and their potential application in major lower limb surgery. Current Vascular Pharmacology 2011;9(1):54-60.                                                                                                                                                     | 718           | Study Design             |
| Nilsson Jr KR, Al-Khatib SM, Zhou Y, Pieper K, White HD, Maggioni AP, et al. Atrial fibrillation management strategies and early mortality after myocardial infarction: Results from the Valsartan in Acute Myocardial Infarction (VALIANT) trial. Heart 2010;96(11):838-42.                                                                                                        | 759           | Intervention/Comparators |
| Nin T, Sairaku A, Yoshida Y, Kamiya H, Tatematsu Y, Nanasato M, et al. A Randomized Controlled Trial of Dabigatran versus Warfarin for Periablation Anticoagulation in Patients Undergoing Ablation of Atrial Fibrillation. Pacing Clin Electrophysiol 2013 Feb;36(2):172-9.                                                                                                        | 17            | Study Population         |
| Nishio H, Ieko M, Nakabayashi T. New therapeutic option for thromboembolism--dabigatran etexilate. Expert Opin Pharmacother 2008 Oct;9(14):2509-17.                                                                                                                                                                                                                                 | 200           | Study Design             |
| Novel antiarrhythmic reduces recurrences of atrial fibrillation. Formulary 1999;34(1):76.                                                                                                                                                                                                                                                                                           | 1090          | Study Design             |
| Nozawa T, Asanoi H, Inoue H. Instability of anticoagulation intensity contributes to occurrence of ischemic stroke in patients with non-rheumatic atrial fibrillation. Japanese Circulation Journal 2001;65(5):404-8.                                                                                                                                                               | 1048          | Intervention/Comparators |

| Reference                                                                                                                                                                                                                                                                                                                 | Ref ID | Reason                   |
|---------------------------------------------------------------------------------------------------------------------------------------------------------------------------------------------------------------------------------------------------------------------------------------------------------------------------|--------|--------------------------|
| Nozawa T, Inoue H, Hirai T, Iwasa A, Okumura K, Lee JD, et al. D-dimer level influences thromboembolic events in patients with atrial fibrillation. <i>International Journal of Cardiology</i> 2006;109(1):59-65.                                                                                                         | 894    | Study Design             |
| Nozawa T, Inoue H, Iwasa A, Okumura K, Jong-dae L, Shimizu A, et al. Effects of anticoagulation intensity on hemostatic markers in patients with non-valvular atrial fibrillation. <i>Circ J</i> 2004 Jan;68(1):29-34.                                                                                                    | 326    | Intervention/Comparators |
| Nuevo Gonzalez JA, Cano Ballesteros JC, Pintor HE, Braun SB, Visus SE, Sevillano Fernandez JA. [Oral anticoagulation excess: analysis from an emergency department]. <i>Rev Clin Esp</i> 2008 Feb;208(2):66-70.                                                                                                           | 209    | Study Population         |
| Oates A, Jackson PR, Austin CA, Channer KS. A new regimen for starting warfarin therapy in out-patients. <i>British Journal of Clinical Pharmacology</i> 1998;46(2):157-61.                                                                                                                                               | 1098   | Intervention/Comparators |
| Oden A, Fahlen M, Hart RG. Optimal INR for prevention of stroke and death in atrial fibrillation: a critical appraisal (Provisional abstract). <i>Thrombosis Research</i> 2006;117:493-9.                                                                                                                                 | 1182   | Study Design             |
| O'Donnell MJ, Berge E, Sandset PM. Are there patients with acute ischemic stroke and atrial fibrillation that benefit from low molecular weight heparin? <i>Stroke</i> 2006 Feb;37(2):452-5.                                                                                                                              | 271    | Intervention/Comparators |
| Ogawa S, Shinohara Y, Kanmuri K. Safety and efficacy of the oral direct factor Xa inhibitor apixaban in Japanese patients with non-valvular atrial fibrillation. <i>Circulation Journal</i> 2011;75(8):1852-9.                                                                                                            | 674    | Study Design             |
| Ogawa S, Yamashita T, Yamazaki T, Aizawa Y, Atarashi H, Inoue H, et al. Optimal treatment strategy for patients with paroxysmal atrial fibrillation: J-RHYTHM study. <i>Circulation Journal</i> 2009;73(2):242-8.                                                                                                         | 815    | Intervention/Comparators |
| Ogilvie IM, Newton N, Welner SA, Lip GYH. Suboptimal oral anticoagulant treatment in patients with atrial fibrillation at elevated risk for stroke: A systematic review. <i>J Am Coll Cardiol</i> 2009;53(10):A376.                                                                                                       | 818    | Study Design             |
| Ogilvie IM, Welner SA, Cowell W, Lip GY. Ischaemic stroke and bleeding rates in 'real-world' atrial fibrillation patients (Structured abstract). <i>Thrombosis and Haemostasis</i> 2011;106:34-44.                                                                                                                        | 1186   | Study Design             |
| Okcun B, Yigit Z, Yildiz A, Uzunhasan I, Orta K, Baskurt M, et al. What should be the primary treatment in atrial fibrillation: ventricular rate control or sinus rhythm control with long-term anticoagulation? <i>J Int Med Res</i> 2009 Mar;37(2):464-71.                                                              | 184    | Study Design             |
| Okishige K, Fukunami M, Kumagai K, Atarashi H, Inoue H. Pharmacological conversion of persistent atrial fibrillation into sinus rhythm with oral pilsicainide: pilsicainide suppression trial for persistent atrial fibrillation II. <i>Circ J</i> 2006 Jun;70(6):657-61.                                                 | 261    | Intervention/Comparators |
| Oldgren J, Alings M, Darius H. Chads2 score predicted bleeding and death in atrial fibrillation treated with anticoagulants. <i>Annals of Internal Medicine</i> 2012;156(8):JC4-13.                                                                                                                                       | 597    | Study Design             |
| Olsson SB, Rasmussen LH, Tveit A, Jensen E, Wessman P, Panfilov S, et al. Safety and tolerability of an immediate-release formulation of the oral direct thrombin inhibitor AZD0837 in the prevention of stroke and systemic embolism in patients with atrial fibrillation. <i>Thromb Haemost</i> 2010 Mar;103(3):604-12. | 157    | Intervention/Comparators |



| Reference                                                                                                                                                                                                                                                                                                                                 | Ref ID | Reason                   |
|-------------------------------------------------------------------------------------------------------------------------------------------------------------------------------------------------------------------------------------------------------------------------------------------------------------------------------------------|--------|--------------------------|
| Olsson SB. Stroke prevention with the oral direct thrombin inhibitor ximelagatran compared with warfarin in patients with non-valvular atrial fibrillation (SPORTIF III): randomised controlled trial. <i>Lancet</i> 2003 Nov 22;362(9397):1691-8.                                                                                        | 328    | Intervention/Comparators |
| Omran H, Hammerstingl C, Schmidt H, von der RG, Paar WD, Luderitz B. A prospective and randomized comparison of the safety and effects of therapeutic levels of enoxaparin versus unfractionated heparin in chronically anticoagulated patients undergoing elective cardiac catheterization. <i>Thromb Haemost</i> 2003 Aug;90(2):267-71. | 332    | Intervention/Comparators |
| Optimal oral anticoagulant therapy in patients with nonrheumatic atrial fibrillation and recent cerebral ischemia. The European Atrial Fibrillation Trial Study Group. <i>N Engl J Med</i> 1995 Jul 6;333(1):5-10.                                                                                                                        | 461    | Study Design             |
| Osterspey A, Krome A. [Role of the new oral anticoagulants in comparison to vitamin K antagonists in practice]. <i>Herz</i> 2012 Jun;37(4):384-92.                                                                                                                                                                                        | 47     | Study Design             |
| Oswald N, Bateman H. Applying research evidence to individuals in primary care: a study using non-rheumatic atrial fibrillation. <i>Fam Pract</i> 1999 Aug;16(4):414-9.                                                                                                                                                                   | 417    | Intervention/Comparators |
| Ouyang F, Ernst S, Chun J, Bansch D, Li Y, Schaumann A, et al. Electrophysiological findings during ablation of persistent atrial fibrillation with electroanatomic mapping and double Lasso catheter technique. <i>Circulation</i> 2005;112(20):3038-48.                                                                                 | 909    | Study Design             |
| Overbeck P. [Anticoagulation in atrial fibrillation. Standard in stroke prevention is eliminated]. <i>MMW Fortschr Med</i> 2011 Sep 15;153(37):12.                                                                                                                                                                                        | 80     | Study Design             |
| Ozaydin M, Varol E, Aslan SM, Kucuktepe Z, Dogan A, Ozturk M, et al. Effect of Atorvastatin on the Recurrence Rates of Atrial Fibrillation After Electrical Cardioversion. <i>American Journal of Cardiology</i> 2006;97(10):1490-3.                                                                                                      | 891    | Intervention/Comparators |
| Ozdemir M, Turkoglu S, Kaya MG, Cengel A. Prospective randomized trial of transthoracic versus low-energy internal cardioversion in persistent atrial fibrillation: long term follow-up. <i>Int Heart J</i> 2006 Sep;47(5):753-62.                                                                                                        | 250    | Intervention/Comparators |
| Paikin JS, Haroun MJ, Eikelboom JW. Dabigatran for stroke prevention in atrial fibrillation: the RELY trial. <i>Expert Rev Cardiovasc Ther</i> 2011 Mar;9(3):279-86.                                                                                                                                                                      | 112    | Study Design             |
| Paikin JS, Wright DS, Eikelboom JW. Effectiveness and safety of combined antiplatelet and anticoagulant therapy: A critical review of the evidence from randomized controlled trials. <i>Blood Reviews</i> 2011;25(3):123-9.                                                                                                              | 696    | Study Design             |
| Palardy M, Ducharme A, Nattel S, Tardif JC, White M, Racine N, et al. Absence of protective effect of renin-angiotensin system inhibitors on atrial fibrillation development: Insights from the Canadian Trail of Atrial Fibrillation (CTAF). <i>Canadian Journal of Cardiology</i> 2008;24(9):709-13.                                    | 823    | Intervention/Comparators |
| Palareti G, Hirsh J, Legnani C, Manotti C, D'Angelo A, Pengo V, et al. Oral anticoagulation treatment in the elderly: A nested, prospective, case-control study. <i>Archives of Internal Medicine</i> 2000;160(4):470-8.                                                                                                                  | 1074   | Study Design             |
| Palatnik A. Stay up-to-date on anticoagulants: Learn about new drugs and review existing ones to keep blood flowing. <i>Nursing Critical Care</i> 2012;7(6):16-20.                                                                                                                                                                        | 550    | Study Design             |

| <b>Reference</b>                                                                                                                                                                                                                                                                                                                                             | <b>Ref ID</b> | <b>Reason</b>            |
|--------------------------------------------------------------------------------------------------------------------------------------------------------------------------------------------------------------------------------------------------------------------------------------------------------------------------------------------------------------|---------------|--------------------------|
| Pappone C, Augello G, Sala S, Gugliotta F, Vicedomini G, Gulletta S, et al. A Randomized Trial of Circumferential Pulmonary Vein Ablation Versus Antiarrhythmic Drug Therapy in Paroxysmal Atrial Fibrillation. The APAF Study. <i>J Am Coll Cardiol</i> 2006;48(11):2340-7.                                                                                 | 881           | Intervention/Comparators |
| Paraskevaidis IA, Kremastinos DT, Matsakas EP, Tsetsos GA, Theodorakis GN, Toutouzas PK. Transesophageal detection of early systolic reverse pulmonary venous flow in atrial fibrillation. <i>American Journal of Cardiology</i> 1994;73(5):392-6.                                                                                                           | 1152          | Intervention/Comparators |
| Parra D, Beckey NP, Stevens GR. The effect of acetaminophen on the international normalized ratio in patients stabilized on warfarin therapy. <i>Pharmacotherapy</i> 2007;27(5):675-83.                                                                                                                                                                      | 865           | Intervention/Comparators |
| Parry D, Bryan S, Gee K, Murray E, Fitzmaurice D. Patient costs in anticoagulation management: a comparison of primary and secondary care. <i>Br J Gen Pract</i> 2001 Dec;51(473):972-6.                                                                                                                                                                     | 368           | Study Design             |
| Parry PV, Engh JA. Application of the RELY study to lifetime risks of atrial fibrillation: implications for spontaneous intracranial hemorrhage. <i>Neurosurgery</i> 2012 Feb;70(2):N10-N11.                                                                                                                                                                 | 68            | Intervention/Comparators |
| Patel R, Medow M. Cost-effectiveness based pricing for dabigatran for the primary prophylaxis of stroke in elderly patients with atrial fibrillation. <i>Journal of General Internal Medicine</i> 2010;25:S249.                                                                                                                                              | 757           | Study Design             |
| Patrono C, Collier B, FitzGerald GA, Hirsh J, Roth G. Platelet-active drugs: The relationships among dose, effectiveness, and side effects - The Seventh ACCP Conference on Antithrombotic and Thrombolytic Therapy. <i>Chest</i> 2004;126(3 SUPPL.):234S-64S.                                                                                               | 947           | Study Design             |
| Patrono C, Rocca B. Interindividual variability in response to aspirin and P2Y12 blockers in patients at high cardiovascular risk-the state of evidence. <i>Dialogues in Cardiovascular Medicine</i> 2011;16(1):5-20.                                                                                                                                        | 666           | Study Design             |
| Pawar PP, Jones LG, Feller M, Guichard JL, Mujib M, Ahmed MI, et al. Association between smoking and outcomes in older adults with atrial fibrillation. <i>Archives of Gerontology and Geriatrics</i> 2012;55(1):85-90.                                                                                                                                      | 586           | Study Design             |
| Pearce LA, Hart RG, Halperin JL. Assessment of three schemes for stratifying stroke risk in patients with nonvalvular atrial fibrillation. <i>American Journal of Medicine</i> 2000;109(1):45-51.                                                                                                                                                            | 1066          | Study Design             |
| Pedely L, Nyenhuis DL. Vascular cognitive impairment. <i>Current Treatment Options in Cardiovascular Medicine</i> 2006;8(3):243-50.                                                                                                                                                                                                                          | 890           | Study Design             |
| Pengo V, Barbero F, Biasiolo A, Pegoraro C, Noventa F, Iliceto S. Prevention of thromboembolism in patients with mitral stenosis and associated atrial fibrillation: effectiveness of low intensity (INR target 2) oral anticoagulant treatment. <i>Thromb Haemost</i> 2003 Apr;89(4):760-4.                                                                 | 342           | Study Population         |
| Pengo V, Crippa L, Falanga A, Finazzi G, Marongiu F, Palareti G, et al. Questions and answers on the use of dabigatran and perspectives on the use of other new oral anticoagulants in patients with atrial fibrillation; a consensus document of the Italian federation of thrombosis centers (FCSA). <i>Thrombosis and Haemostasis</i> 2011;106(5):868-76. | 653           | Study Design             |
| Pengo V, Cucchini U, Denas G, Davidson BL, Marzot F, Jose SP, et al. Lower versus standard intensity oral anticoagulant therapy (OAT) in elderly warfarin-experienced patients with non-valvular atrial fibrillation. <i>Thromb Haemost</i> 2010 Feb;103(2):442-9.                                                                                           | 158           | Intervention/Comparators |

| <b>Reference</b>                                                                                                                                                                                                                                                                                                  | <b>Ref ID</b> | <b>Reason</b>            |
|-------------------------------------------------------------------------------------------------------------------------------------------------------------------------------------------------------------------------------------------------------------------------------------------------------------------|---------------|--------------------------|
| Pengo V, Cucchini U, Denas G, Davidson BL, Marzot F, Jose SP, et al. Lower versus standard intensity oral anticoagulant therapy (OAT) in elderly warfarin-experienced patients with non-valvular atrial fibrillation: A randomised primary prevention trial. <i>Thrombosis and Haemostasis</i> 2010;103(2):442-9. | 771           | Intervention/Comparators |
| Pengo V, Legnani C, Noventa F, Palareti G. Oral anticoagulant therapy in patients with nonrheumatic atrial fibrillation and risk of bleeding. A Multicenter Inception Cohort Study. <i>Thromb Haemost</i> 2001 Mar;85(3):418-22.                                                                                  | 377           | Study Design             |
| Pengo V, Zasso A, Barbero F, Banzato A, Nante G, Parissenti L, et al. Effectiveness of fixed minidose warfarin in the prevention of thromboembolism and vascular death in nonrheumatic atrial fibrillation. <i>Am J Cardiol</i> 1998 Aug 15;82(4):433-7.                                                          | 432           | Intervention/Comparators |
| Perez A, Eraso LH, Merli GJ. Implications of new anticoagulants in primary practice. <i>Int J Clin Pract</i> 2013 Feb;67(2):139-56.                                                                                                                                                                               | 8             | Study Design             |
| Perez FJ, Schubert CM, Parvez B, Pathak V, Ellenbogen KA, Wood MA. Long-term outcomes after catheter ablation of cavo-tricuspid isthmus dependent atrial flutter: A meta-analysis. <i>Circulation: Arrhythmia and Electrophysiology</i> 2009;2(4):393-401.                                                        | 790           | Intervention/Comparators |
| Perez GF, Lourenzo PI, Companion J, Escriba A, Perez SD, Guillen M, et al. Platelet aggregation in different antithrombotic regimens. Possible proaggregant effect of low level oral anticoagulation. <i>Rev Port Cardiol</i> 2002 May;21(5):541-51.                                                              | 355           | Study Population         |
| Perez-Gomez F, Alegria E, Berjon J, Iriarte JA, Zumalde J, Salvador A, et al. Comparative effects of antiplatelet, anticoagulant, or combined therapy in patients with valvular and nonvalvular atrial fibrillation: a randomized multicenter study. <i>J Am Coll Cardiol</i> 2004 Oct 19;44(8):1557-66.          | 304           | Intervention/Comparators |
| Perez-Gomez F, Iriarte JA, Zumalde J, Berjon J, Salvador A, Alegria E, et al. Antithrombotic therapy in elderly patients with atrial fibrillation: Effects and bleeding complications: A stratified analysis of the NASPEAF randomized trial. <i>European Heart Journal</i> 2007;28(8):996-1003.                  | 867           | Intervention/Comparators |
| Perez-Gomez F, Salvador A, Zumalde J, Iriarte JA, Berjon J, Alegria E, et al. Effect of antithrombotic therapy in patients with mitral stenosis and atrial fibrillation: a sub-analysis of NASPEAF randomized trial. <i>Eur Heart J</i> 2006 Apr;27(8):960-7.                                                     | 276           | Study Population         |
| Perret GC, Wahl DG. Low-dose warfarin in atrial fibrillation leads to more thromboembolic events without reducing major bleeding when compared to adjusted-dose: a meta-analysis (Structured abstract). <i>Thrombosis and Haemostasis</i> 2004;91:394-402.                                                        | 1178          | Intervention/Comparators |
| Perret-Guillaume C, Wahl DG. Low-dose warfarin in atrial fibrillation leads to more thromboembolic events without reducing major bleeding when compared to adjusted-dose--a meta-analysis. <i>Thromb Haemost</i> 2004 Feb;91(2):394-402.                                                                          | 325           | Intervention/Comparators |
| Peters AJ, Borries M, Gradaus F, Jax TW, Schoebel FC, Strauer BE. In vitro bleeding test with PFA-100(trademark) - Aspects of controlling individual acetylsalicylic acid induced platelet inhibition in patients with cardiovascular disease. <i>Journal of Thrombosis and Thrombolysis</i> 2001;12(3):263-72.   | 1030          | Study Population         |
| Petersen P, Grind M, Adler J. Ximelagatran versus warfarin for stroke prevention in patients with nonvalvular atrial fibrillation. SPORTIF II: a dose-guiding, tolerability, and safety study. <i>J Am Coll Cardiol</i> 2003 May 7;41(9):1445-51.                                                                 | 339           | Intervention/Comparators |

| Reference                                                                                                                                                                                                                                                                     | Ref ID | Reason                   |
|-------------------------------------------------------------------------------------------------------------------------------------------------------------------------------------------------------------------------------------------------------------------------------|--------|--------------------------|
| Petersen P, Kastrup J, Helweg-Larsen S, Boysen G, Godtfredsen J. Risk factors for thromboembolic complications in chronic atrial fibrillation. The Copenhagen AFASAK study. Arch Intern Med 1990 Apr;150(4):819-21.                                                           | 499    | Intervention/Comparators |
| Pettinger TK, Owens CT. Use of low-molecular-weight heparin during dental extractions in a medicaid population. J Manag Care Pharm 2007 Jan;13(1):53-8.                                                                                                                       | 240    | Intervention/Comparators |
| Phillips L, Grasela TH, Agnew JR, Ludwig EA, Thompson GA. A population pharmacokinetic-pharmacodynamic analysis and model validation of azimilide. Clinical Pharmacology and Therapeutics 2001;70(4):370-83.                                                                  | 1032   | Study Design             |
| Phillips RA. A Review of Therapeutic Strategies for Risk Reduction of Recurrent Stroke. Progress in Cardiovascular Diseases 2008;50(4):264-73.                                                                                                                                | 848    | Study Design             |
| Piccini JP, Stevens SR, Chang Y, Singer DE, Lokhnygina Y, Go AS, et al. Renal dysfunction as a predictor of stroke and systemic embolism in patients with nonvalvular atrial fibrillation: Validation of the R2CHADS2 index in the ROCKET AF. Circulation 2013;127(2):224-32. | 514    | Study Design             |
| Pichette M, Stevens LM, Noiseux N, Gobeil F, Mansour S. Effectiveness of warfarin therapy for atrial fibrillation in a real world population. Canadian Journal of Cardiology 2011;27(5):S122.                                                                                 | 668    | Study Design             |
| Pink J, Lane S, Pirmohamed M, Hughes DA. Dabigatran etexilate versus warfarin in management of non-valvular atrial fibrillation in UK context: quantitative benefit-harm and economic analyses. BMJ 2011;343:d6333.                                                           | 74     | Study Design             |
| Pirmohamed M. Variability in response to anticoagulants. Basic and Clinical Pharmacology and Toxicology 2010;107:50.                                                                                                                                                          | 752    | Study Design             |
| Pisters R, Lip GYH. Safety and efficacy of new anticoagulants in patients with heart failure. Curr Heart Fail Rep 2013;10(1):18-25.                                                                                                                                           | 508    | Study Population         |
| Plicht B, Kahlert P, Erbel R, Konorza TF. [Interventional left atrial appendage occlusion. A reasonable alternative to oral anticoagulation - even in the era of the new substances?]. Herz 2012 Jun;37(4):402-6.                                                             | 48     | Study Design             |
| Poli D, Testa S, Antonucci E, Grifoni E, Paoletti O, Lip GYH. Bleeding and stroke risk in a real-world prospective primary prevention cohort of patients with atrial fibrillation. Chest 2011;140(4):918-24.                                                                  | 662    | Study Design             |
| Poller L, Keown M, Ibrahim S, Lowe G, Moia M, Turpie AG, et al. A multicentre randomised assessment of the DAWN AC computer-assisted oral anticoagulant dosage program. Thrombosis and Haemostasis 2009;101(3):487-94.                                                        | 813    | Intervention/Comparators |
| Poller L, Keown M, Ibrahim S, Lowe G, Moia M, Turpie AG, et al. An international multicenter randomized study of computer-assisted oral anticoagulant dosage vs. medical staff dosage. Journal of Thrombosis and Haemostasis 2008;6(6):935-43.                                | 839    | Intervention/Comparators |
| Posada IS, Barriaes V. Alternate-day dosing of aspirin in atrial fibrillation. American Heart Journal 1999;138(1 I):137-43.                                                                                                                                                   | 1085   | Intervention/Comparators |
| Potpara TS, Lip GYH. New anticoagulation drugs for atrial fibrillation. Clinical Pharmacology and Therapeutics 2011;90(4):502-6.                                                                                                                                              | 661    | Study Design             |

| Reference                                                                                                                                                                                                                                                                                | Ref ID | Reason                   |
|------------------------------------------------------------------------------------------------------------------------------------------------------------------------------------------------------------------------------------------------------------------------------------------|--------|--------------------------|
| Poungvarin N, Opartkiattikul N, Chaithiraphan S, Viriyavejakul A. A comparative study of coumadin and aspirin for primary cardioembolic stroke and thromboembolic preventions of chronic rheumatic mitral stenosis with atrial fibrillation. <i>J Med Assoc Thai</i> 1994 Jan;77(1):1-6. | 474    | Study Population         |
| Prati P, Casaroli M, Vinci C, Pittaro I. Secondary prevention in patients with cerebrovascular ischaemic disease. <i>Italian Journal of Neurological Sciences</i> 1998;19(5):S43-S47.                                                                                                    | 1093   | Study Population         |
| Predictors of thromboembolism in atrial fibrillation: I. Clinical features of patients at risk. The Stroke Prevention in Atrial Fibrillation Investigators. <i>Ann Intern Med</i> 1992 Jan 1;116(1):1-5.                                                                                 | 489    | Intervention/Comparators |
| Predictors of thromboembolism in atrial fibrillation: II. Echocardiographic features of patients at risk. The Stroke Prevention in Atrial Fibrillation Investigators. <i>Ann Intern Med</i> 1992 Jan 1;116(1):6-12.                                                                      | 488    | Intervention/Comparators |
| Prins MH, Guillemin I, Gilet H, Gabriel S, Essers B, Raskob G, et al. Scoring and psychometric validation of the Perception of Anticoagulant Treatment Questionnaire (PACT-Q). <i>Health Qual Life Outcomes</i> 2009;7:30.                                                               | 186    | Study Design             |
| Prohaska M, Von Essen R. Anticoagulation in non-rheumatic atrial fibrillation. New recommendations based on five prospective studies. <i>Fortschritte der Medizin</i> 1994;112(1-2):25-8.                                                                                                | 1153   | Study Design             |
| Protheroe J, Fahey T, Montgomery AA, Peters TJ. Effects of patients' preferences on the treatment of atrial fibrillation: observational study of patient-based decision analysis. <i>West J Med</i> 2001 May;174(5):311-5.                                                               | 376    | Study Design             |
| Protheroe J, Fahey T, Montgomery AA, Peters TJ. The impact of patients' preferences on the treatment of atrial fibrillation: observational study of patient based decision analysis. <i>BMJ</i> 2000 May 20;320(7246):1380-4.                                                            | 394    | Study Design             |
| Psenkova M, Lukac M, Mackovicova S, Stachova M, Bielik J, Pietsch GA, et al. Prevention of stroke in patients with atrial fibrillation: Costutility analysis of rivaroxaban versus warfarin in Slovakia. <i>Value in Health</i> 2012;15(7):A375.                                         | 545    | Study Design             |
| Pugh D, Mead GE, Pugh J. Attitudes of physicians regarding anticoagulation for atrial fibrillation: A systematic review. <i>International Journal of Stroke</i> 2011;6:42.                                                                                                               | 645    | Study Population         |
| Pullicino P, Thompson JL, Barton B, Levin B, Graham S, Freudenberger RS. Warfarin versus aspirin in patients with reduced cardiac ejection fraction (WARCEF): rationale, objectives, and design. <i>J Card Fail</i> 2006 Feb;12(1):39-46.                                                | 267    | Study Design             |
| Quinn RR, Scott-Douglas N. Dialysis: Warfarin: safe in dialysis patients with atrial fibrillation? <i>Nature Reviews Nephrology</i> 2010;6(1):17-8.                                                                                                                                      | 774    | Study Design             |
| Radecki RP. Dabigatran: Uncharted waters and potential harms. <i>Annals of Internal Medicine</i> 2012;157(1):66-8.                                                                                                                                                                       | 585    | Study Design             |
| Raffaelli S, Paciaroni E. Stroke and atrial fibrillation: Risks, prevention and therapy in the elderly. <i>Archives of Gerontology and Geriatrics</i> 1995;20(1):23-8.                                                                                                                   | 1140   | Study Design             |
| Rahimi AR, Wrights B, Akhondi H, Richard CM. Clinical correlation between effective anticoagulants and risk of stroke: are we using evidence-based strategies? <i>South Med J</i> 2004 Oct;97(10):924-31.                                                                                | 302    | Study Design             |

| Reference                                                                                                                                                                                                                                                                                                          | Ref ID | Reason                   |
|--------------------------------------------------------------------------------------------------------------------------------------------------------------------------------------------------------------------------------------------------------------------------------------------------------------------|--------|--------------------------|
| Ray IB, Heist EK. Treating atrial fibrillation: What is the consensus now? <i>Postgraduate Medicine</i> 2005;118(4):47-58.                                                                                                                                                                                         | 915    | Study Design             |
| Reddy VY, Holmes D, Doshi SK, Neuzil P, Kar S. Safety of percutaneous left atrial appendage closure: results from the Watchman Left Atrial Appendage System for Embolic Protection in Patients with AF (PROTECT AF) clinical trial and the Continued Access Registry. <i>Circulation</i> 2011 Feb 1;123(4):417-24. | 121    | Intervention/Comparators |
| Reed M. Outlook: Clinical trials. <i>Pharm.Times</i> 76. 2010.                                                                                                                                                                                                                                                     | 731    | Study Design             |
| Re-LY trial: new sub-analyses highlight stroke reduction in all types of non-valvular atrial fibrillation. <i>Cardiovasc J Afr</i> 2011 May;22(3):164.                                                                                                                                                             | 100    | Study Design             |
| Rengo G, Pagano G, Squizzato A, Moja L, Femminella GD, de LC, et al. Oral anticoagulation therapy in heart failure patients in sinus rhythm: a systematic review and meta-analysis. <i>PLoS One</i> 2013;8(1):e52952.                                                                                              | 9      | Study Population         |
| Restovic G, Carcedo D, McLeod EJ, Guillermin ALG, Evers T. Cost-effectiveness of rivaroxaban versus acenocumarol in the stroke prevention in patients with non-valvular atrial fibrillation in the spanish setting. <i>Value in Health</i> 2012;15(7):A375.                                                        | 549    | Study Design             |
| Rheeder P, Ker JA. Clinical Practice: Is this treatment worthwhile? How to read the medical journals. <i>South African Medical Journal</i> 2000;90(1):37-9.                                                                                                                                                        | 1075   | Study Design             |
| Rich MW. From the literature 2. <i>Cardiovascular Reviews and Reports</i> 1992;13(3):15-6+19.                                                                                                                                                                                                                      | 1161   | Study Design             |
| Richardson PG, Mitsiades C, Schlossman R, Munshi N, Anderson K. New drugs for myeloma. <i>Oncologist</i> 2007;12(6):664-89.                                                                                                                                                                                        | 862    | Study Design             |
| Rienstra M, Van Gelder IC, Hagens VE, Veeger NJ, Van Veldhuisen DJ, Crijns HJ. Mending the rhythm does not improve prognosis in patients with persistent atrial fibrillation: a subanalysis of the RACE study. <i>Eur Heart J</i> 2006 Feb;27(3):357-64.                                                           | 278    | Intervention/Comparators |
| Ripley TL, Harrison D, Germany RE, Adamson PB. Effect of heart failure exacerbations on anticoagulation: a prospective, observational, pilot cohort study. <i>Clin Ther</i> 2010 Mar;32(3):506-14.                                                                                                                 | 146    | Study Design             |
| Rivaroxaban and atrial fibrillation. <i>Prescrire International</i> 2012;21(132):257-60.                                                                                                                                                                                                                           | 540    | Study Design             |
| Rivaroxaban-once daily, oral, direct factor Xa inhibition compared with vitamin K antagonism for prevention of stroke and Embolism Trial in Atrial Fibrillation: rationale and design of the ROCKET AF study. <i>Am Heart J</i> 2010 Mar;159(3):340-7.                                                             | 151    | Study Design             |
| Roberson RS, Shaw AD. New oral anticoagulants for atrial fibrillation: The factor Xa inhibitors rivaroxaban and apixaban. <i>Reviews in Cardiovascular Medicine</i> 2012;13(1):e46-e48.                                                                                                                            | 584    | Study Design             |
| Roberts GW, Druskeit T, Jorgensen LE, Wing LM, Gallus AS, Miller C, et al. Comparison of an age adjusted warfarin loading protocol with empirical dosing and Fennerty's protocol. <i>Aust N Z J Med</i> 1999 Oct;29(5):731-6.                                                                                      | 407    | Intervention/Comparators |
| Robinson A, Thomson RG. The potential use of decision analysis to support shared decision making in the face of uncertainty: the example of atrial fibrillation and warfarin anticoagulation. <i>Qual Health Care</i> 2000 Dec;9(4):238-44.                                                                        | 384    | Intervention/Comparators |

| <b>Reference</b>                                                                                                                                                                                                                                                                                                                                                                                                           | <b>Ref ID</b> | <b>Reason</b>            |
|----------------------------------------------------------------------------------------------------------------------------------------------------------------------------------------------------------------------------------------------------------------------------------------------------------------------------------------------------------------------------------------------------------------------------|---------------|--------------------------|
| Rodgers GM, Renfurm RW, Halperin JL, Petersen P, Lip GYH. Efficacy of the oral FXa inhibitor, ym150 on biomarkers for thrombogenesis in 1297 patients with non-valvular atrial fibrillation: Phase IIB dose confirmation study (OPAL-2). <i>Journal of Thrombosis and Haemostasis</i> 2011;9:887.                                                                                                                          | 681           | Intervention/Comparators |
| Rodriguez CD, Casajuana BJ, Botinas MM. [Anticoagulation and non-rheumatic auricular fibrillation]. <i>Aten Primaria</i> 1998 May 15;21(8):553-5.                                                                                                                                                                                                                                                                          | 435           | Study Design             |
| Rodriguez RA, Carrier M, Wells PS. Non-adherence to new oral anticoagulants: A reason for concern during long-term anticoagulation? <i>Journal of Thrombosis and Haemostasis</i> 2013;11(2):390-4.                                                                                                                                                                                                                         | 512           | Study Design             |
| Rombouts EK, Rosendaal FR, van der Meer FJM. Daily vitamin K supplementation improves anticoagulant stability. <i>Journal of Thrombosis and Haemostasis</i> 2007;5(10):2043-8.                                                                                                                                                                                                                                             | 853           | Intervention/Comparators |
| Ronaszki A, Alings M, Egstrup K, Gaciong Z, Hranai M, Kiraly C, et al. Pharmacological cardioversion of atrial fibrillation: a double-blind, randomized, placebo-controlled, multicentre, dose-escalation study of AZD1305 given intravenously. <i>Europace</i> 2011;13(8):1148-56.                                                                                                                                        | 676           | Intervention/Comparators |
| Roux JF, Zado E, Callans DJ, Garcia F, Lin D, Marchlinski FE, et al. Antiarrhythmics after ablation of atrial fibrillation (5A study). <i>Circulation</i> 2009;120(12):1036-40.                                                                                                                                                                                                                                            | 784           | Intervention/Comparators |
| Roy B, Desai RV, Mujib M, Epstein AE, Zhang Y, Guichard J, et al. Effect of warfarin on outcomes in septuagenarian patients with atrial fibrillation. <i>Am J Cardiol</i> 2012 Feb 1;109(3):370-7.                                                                                                                                                                                                                         | 72            | Intervention/Comparators |
| Ruff CT, Giugliano RP, Antman EM, Crugnale SE, Bocanegra T, Mercuri M, et al. Evaluation of the novel factor Xa inhibitor edoxaban compared with warfarin in patients with atrial fibrillation: design and rationale for the Effective aNticoagulation with factor xA next GEneration in Atrial Fibrillation-Thrombolysis In Myocardial Infarction study 48 (ENGAGE AF-TIMI 48). <i>Am Heart J</i> 2010 Oct;160(4):635-41. | 140           | Study Design             |
| Rutten FH, Van Riet EES, Hollander M, Hoes AW. Longterm effects of aspirin and vitamin K antagonists on mortality in patients with atrial fibrillation and heart failure. An observational study. <i>European Journal of Heart Failure, Supplement</i> 2011;10:S120-S121.                                                                                                                                                  | 695           | Study Design             |
| Rymer MM. Antithrombotic therapy in stroke prevention and treatment: A review. <i>Journal of Thrombosis and Thrombolysis</i> 1998;5(SUPPL. 1):S43-S47.                                                                                                                                                                                                                                                                     | 1100          | Study Design             |
| Saad EB, Costa IP, Costa RE, Inacio LA, Jr., Slater C, Camiletti A, et al. Safety of ablation for atrial fibrillation with therapeutic INR: comparison with transition to low-molecular-weight heparin. <i>Arq Bras Cardiol</i> 2011 Oct;97(4):289-96.                                                                                                                                                                     | 88            | Intervention/Comparators |
| Sacco RL, Diener HC, Yusuf S, Cotton D, Ounpuu S, Lawton WA, et al. Aspirin and extended-release dipyridamole versus clopidogrel for recurrent stroke. <i>New England Journal of Medicine</i> 2008;359(12):1238-51.                                                                                                                                                                                                        | 832           | Intervention/Comparators |
| Salamunovich S, Shinmoto M, Tung T, Mathew M, Cheng I, Wong K. Evaluation of a pharmacist-led medication reconciliation program in post-discharge patients: A phase II study. <i>Journal of Managed Care Pharmacy</i> 2012;18(2):175.                                                                                                                                                                                      | 626           | Study Population         |
| Salanti G, Kavoura FK, Ioannidis JPA. Exploring the geometry of treatment networks. <i>Annals of Internal Medicine</i> 2008;148(7):544-53.                                                                                                                                                                                                                                                                                 | 844           | Study Design             |

| Reference                                                                                                                                                                                                                                                                                                                   | Ref ID | Reason                   |
|-----------------------------------------------------------------------------------------------------------------------------------------------------------------------------------------------------------------------------------------------------------------------------------------------------------------------------|--------|--------------------------|
| Salazar DE, Mendell J, Kastrissios H, Green M, Carrothers TJ, Song S, et al. Modelling and simulation of edoxaban exposure and response relationships in patients with atrial fibrillation. <i>Thromb Haemost</i> 2012 May;107(5):925-36.                                                                                   | 56     | Study Design             |
| Samsa G, Matchar D. Can continuous quality improvement be assessed using randomized trials? <i>Health Services Research</i> 2000;35(3):687-700.                                                                                                                                                                             | 1065   | Study Design             |
| Sandercock-Peter AG, Gibson LM, Liu M. Anticoagulants for preventing recurrence following presumed non-cardioembolic ischaemic stroke or transient ischaemic attack. <i>Cochrane Database of Systematic Reviews</i> 2009.                                                                                                   | 1174   | Intervention/Comparators |
| Santangeli P, Di Biase L, Pelargonio G, Dello Russo A, Casella M, Sanchez J, et al. Catheter ablation of atrial fibrillation: Randomized controlled trials and registries, a look back and the view forward. <i>Journal of Interventional Cardiac Electrophysiology</i> 2011;31(1):69-80.                                   | 686    | Study Design             |
| Santangeli P, Di BL, Horton R, Burkhardt JD, Sanchez J, Al-Ahmad A, et al. Ablation of atrial fibrillation under therapeutic warfarin reduces periprocedural complications: evidence from a meta-analysis. <i>Circ Arrhythm Electrophysiol</i> 2012 Apr;5(2):302-11.                                                        | 66     | Intervention/Comparators |
| Sarafoff N, Ndrepepa G, Mehilli J, Dorrlor K, Schulz S, Iijima R, et al. Aspirin and clopidogrel with or without phenprocoumon after drug eluting coronary stent placement in patients on chronic oral anticoagulation. <i>Journal of Internal Medicine</i> 2008;264(5):472-80.                                             | 827    | Study Population         |
| Saseen JJ. Is rate control better than rhythm control for atrial fibrillation in older high-risk patients? <i>J Fam Pract</i> 2003 Mar;52(3):192, 194.                                                                                                                                                                      | 346    | Intervention/Comparators |
| Sato H, Ishikawa K, Kitabatake A, Ogawa S, Maruyama Y, Yokota Y, et al. Low-dose aspirin for prevention of stroke in low-risk patients with atrial fibrillation: Japan Atrial Fibrillation Stroke Trial. <i>Stroke</i> 2006 Feb;37(2):447-51.                                                                               | 273    | Intervention/Comparators |
| Sato H, Koretsune Y, Fukunami M, Kodama K, Yamada Y, Fujii K, et al. Aspirin attenuates the incidence of silent brain lesions in patients with nonvalvular atrial fibrillation. <i>Circulation Journal</i> 2004;68(5):410-6.                                                                                                | 959    | Study Design             |
| Saxena R, Koudstaal PJ. Anticoagulants for preventing stroke in patients with nonrheumatic atrial fibrillation and a history of stroke or transient ischaemic attack. <i>Cochrane Database of Systematic Reviews</i> 2004.                                                                                                  | 1173   | Study Design             |
| Saxena R, Lewis S, Berge E, Sandercock PAG, Koudstaal PJ. Risk of early death and recurrent stroke and effect of heparin in 3169 patients with acute ischemic stroke and atrial fibrillation in the International Stroke Trial. <i>Stroke</i> 2001;32(10):2333-7.                                                           | 1035   | Intervention/Comparators |
| Schadlich PK, Schmidt-Lucke C, Huppertz E, Lehmacher W, Nixdorff U, Stellbrink C, et al. Economic evaluation of enoxaparin for anticoagulation in early cardioversion of persisting nonvalvular atrial fibrillation: a statutory health insurance perspective from Germany. <i>Am J Cardiovasc Drugs</i> 2007;7(3):199-217. | 226    | Study Design             |
| Schapkaitz E, Jacobson BF, Becker P, Conway G. Thrombo-embolic and bleeding complications in patients with mechanical valve replacements - A prospective observational study. <i>South African Medical Journal</i> 2006;96(8):710-3.                                                                                        | 888    | Study Population         |



| Reference                                                                                                                                                                                                                                                                                                                                                                                     | Ref ID | Reason                   |
|-----------------------------------------------------------------------------------------------------------------------------------------------------------------------------------------------------------------------------------------------------------------------------------------------------------------------------------------------------------------------------------------------|--------|--------------------------|
| Scherer M, Therapidis P, Miskovic A, Moritz A. Left atrial size reduction improves the sinus rhythm conversion rate after radiofrequency ablation for continuous atrial fibrillation in patients undergoing concomitant cardiac surgery. <i>Thoracic and Cardiovascular Surgeon</i> 2006;54(1):34-8.                                                                                          | 898    | Intervention/Comparators |
| Scherr D, Dalal D, Chilukuri K, Dong J, Spragg D, Henrikson CA, et al. Incidence and predictors of left atrial thrombus prior to catheter ablation of atrial fibrillation. <i>J Cardiovasc Electrophysiol</i> 2009 Apr;20(4):379-84.                                                                                                                                                          | 195    | Study Design             |
| Schmidt-Lucke C, Paar WD, Stellbrink C, Nixdorff U, Hofmann T, Meurer J, et al. Quality of anticoagulation with unfractionated heparin plus phenprocoumon for the prevention of thromboembolic complications in cardioversion for non-valvular atrial fibrillation. Sub-analysis from the Anticoagulation in Cardioversion using Enoxaparin (ACE) trial. <i>Thromb Res</i> 2007;119(1):27-34. | 269    | Intervention/Comparators |
| Schulman S, Majeed A. The oral thrombin inhibitor dabigatran: Strengths and weaknesses. <i>Seminars in Thrombosis and Hemostasis</i> 2012;38(1):7-15.                                                                                                                                                                                                                                         | 629    | Study Design             |
| Schulman S. Bridging strategies for interruption of anticoagulation for invasive procedures. <i>Pathophysiology of Haemostasis and Thrombosis</i> 2010;37:75.                                                                                                                                                                                                                                 | 748    | Intervention/Comparators |
| Scowcroft AC, Lee S, Mant J. Thromboprophylaxis of elderly patients with AF in the UK: an analysis using the General Practice Research Database (GPRD) 2000-2009. <i>Heart</i> 2013 Jan;99(2):127-32.                                                                                                                                                                                         | 19     | Study Design             |
| Seidl K, Rameken M, Drogemuller A, Vater M, Brandt A, Schwacke H, et al. Embolic events in patients with atrial fibrillation and effective anticoagulation: value of transesophageal echocardiography to guide direct-current cardioversion. Final results of the Ludwigshafen Observational Cardioversion Study. <i>J Am Coll Cardiol</i> 2002 May 1;39(9):1436-42.                          | 365    | Intervention/Comparators |
| Self-monitoring for patients on warfarin? <i>Drug Ther Bull</i> 2009 Sep;47(9):98-101.                                                                                                                                                                                                                                                                                                        | 172    | Study Design             |
| Self-monitoring of oral anticoagulation is effective. <i>Australian Journal of Pharmacy</i> 2012;93(1106):85.                                                                                                                                                                                                                                                                                 | 589    | Study Design             |
| Senatore G, Stabile G, Bertaglia E, Donnici G, De Simone A, Zoppo F, et al. Role of transtelephonic electrocardiographic monitoring in detecting short-term arrhythmia recurrences after radiofrequency ablation in patients with atrial fibrillation. <i>J Am Coll Cardiol</i> 2005;45(6):873-6.                                                                                             | 929    | Study Design             |
| Senbokuya N, Kinouchi H, Kanemaru K, Ohashi Y, Fukamachi A, Yagi S, et al. Effects of cilostazol on cerebral vasospasm after aneurysmal subarachnoid hemorrhage: A multicenter prospective, randomized, open-label blinded end point trial - Clinical article. <i>Journal of Neurosurgery</i> 2013;118(1):121-30.                                                                             | 519    | Study Population         |
| Shah S. International Society on Thrombosis and Hemostasis - XIXth Congress: 12-18 July 2003, Birmingham, UK. <i>IDrugs</i> 2003;6(9):858-61.                                                                                                                                                                                                                                                 | 984    | Study Design             |
| Shantsila A, Lip GYH. Highlights of the American Heart Association Scientific Sessions 2011: A focus on ATLAS-TIMI 51, TRACER and PALLAS. <i>Expert Review of Cardiovascular Therapy</i> 2012;10(3):305-7.                                                                                                                                                                                    | 625    | Study Design             |
| Shelton RJ, Clark AL, Goode K, Rigby AS, Houghton T, Kaye GC, et al. A randomised, controlled study of rate versus rhythm control in patients with chronic atrial fibrillation and heart failure: (CAFE-II Study). <i>Heart</i> 2009;95(11):924-30.                                                                                                                                           | 802    | Intervention/Comparators |

| <b>Reference</b>                                                                                                                                                                                                                                                                                    | <b>Ref ID</b> | <b>Reason</b>            |
|-----------------------------------------------------------------------------------------------------------------------------------------------------------------------------------------------------------------------------------------------------------------------------------------------------|---------------|--------------------------|
| Sherman D. Reducing stroke risk in atrial fibrillation patients. <i>Cleveland Clinic Journal of Medicine</i> 1991;58(3):203.                                                                                                                                                                        | 1163          | Study Design             |
| Sherman DG, Kim SG, Boop BS, Corley SD, DiMarco JP, Hart RG, et al. Occurrence and characteristics of stroke events in the Atrial Fibrillation Follow-up Investigation of Sinus Rhythm Management (AFFIRM) study. <i>Arch Intern Med</i> 2005 May 23;165(10):1185-91.                               | 291           | Intervention/Comparators |
| Sherman DG. Antithrombotic and hypofibrinogenetic therapy in acute ischemic stroke: What is the next step? <i>Cerebrovascular Diseases</i> 2004;17(SUPPL. 1):138-43.                                                                                                                                | 965           | Study Design             |
| Shibazaki K, Kimura K, Iguchi Y, Aoki J, Sakai K, Kobayashi K. Differences in brain natriuretic peptide value between transient ischemic attack and stroke patients with atrial fibrillation. <i>European Neurology</i> 2011;66(5):271-6.                                                           | 656           | Study Design             |
| Shine D, Patel J, Kumar J, Malik A, Jaeger J, Maida M, et al. A randomized trial of initial warfarin dosing based on simple clinical criteria. <i>Thrombosis and Haemostasis</i> 2003;89(2):297-304.                                                                                                | 999           | Intervention/Comparators |
| Shinohara Y, Goto S, Doi M, Jensen P. Safety of the novel protease-activated receptor-1 antagonist vorapaxar in Japanese patients with a history of ischemic stroke. <i>Journal of Stroke and Cerebrovascular Diseases</i> 2012;21(4):318-24.                                                       | 602           | Intervention/Comparators |
| Should (black down triangle)dabigatran replace warfarin for stroke prevention in AF? <i>Drug and Therapeutics Bulletin</i> 2011;49(10):114-7.                                                                                                                                                       | 660           | Study Design             |
| Should you add aspirin to your heart patient's warfarin regimen? <i>Journal of Family Practice</i> 2007;56(6):430.                                                                                                                                                                                  | 860           | Study Design             |
| Shu M, Xi R, Zhang P, He G, Song Z, Chi L, et al. Short-term and long-term effects of bisoprolol on chronic heart failure related to rheumatic heart disease and atrial fibrillation. <i>P and T</i> 2005;30(7):400-7.                                                                              | 922           | Intervention/Comparators |
| Sidiropoulos N, Wu AHB. Clinical trials for pharmacogenomics testing for warfarin dosing: Relevance to general community practices. <i>Genetics in Medicine</i> 2011;13(6):505-8.                                                                                                                   | 689           | Intervention/Comparators |
| Siebenhofer A, Hemkens LG, Rakovac I, Spat S, Didjurgeit U. Self-management of oral anticoagulation in elderly patients - Effects on treatment-related Quality of Life. <i>Thrombosis Research</i> 2012;130(3):e60-e66.                                                                             | 569           | Study Design             |
| Siebenhofer A, Rakovac I, Kleespies C, Piso B, Didjurgeit U. Self-management of oral anticoagulation in the elderly: Rationale, design, baselines and oral anticoagulation control after one year of follow-up. A randomized controlled trial. <i>Thrombosis and Haemostasis</i> 2007;97(3):408-16. | 870           | Intervention/Comparators |
| Simmons BJ, Jenner KM, Delate T, Clark NP, Kurz D, Witt DM. Pilot study of a novel patient self-management program for warfarin therapy using venipuncture-acquired international normalized ratio monitoring. <i>Pharmacotherapy</i> 2012 Dec;32(12):1078-84.                                      | 18            | Study Design             |
| Simon T, Azoulay L, Kawabata H, Rosenman M, Ewen E, Synhorst D, et al. How well do contemporary, novel, oral anti-coagulant (NOAC) trials in atrial fibrillation (AF) patients reflect the real world (RW) AF patient? <i>European Heart Journal</i> 2011;32:464.                                   | 677           | Study Design             |

| <b>Reference</b>                                                                                                                                                                                                                                                               | <b>Ref ID</b> | <b>Reason</b>            |
|--------------------------------------------------------------------------------------------------------------------------------------------------------------------------------------------------------------------------------------------------------------------------------|---------------|--------------------------|
| Simpson CS, Yee R, Lee JK, Braney M, Klein GJ, Krahn AD, et al. Safety and feasibility of a novel rate-smoothed ventricular pacing algorithm for atrial fibrillation. <i>American Heart Journal</i> 2001;142(2):294-300.                                                       | 1042          | Intervention/Comparators |
| Singer DE, Hughes RA, Gress DR, Sheehan MA, Oertel LB, Ward Maraventano S, et al. The effect of low-dose warfarin on the risk of stroke in patients with nonrheumatic atrial fibrillation. <i>New England Journal of Medicine</i> 1990;323(22):1505-11.                        | 1164          | Intervention/Comparators |
| Singer DE. Overview of the randomized trials to prevent stroke in atrial fibrillation. <i>Ann Epidemiol</i> 1993 Sep;3(5):563-7.                                                                                                                                               | 480           | Study Design             |
| Singer DE. Problems with stopping rules in the trials of risky therapies: the case of warfarin to prevent stroke in atrial fibrillation. <i>Clin Res</i> 1993 Oct;41(3):482-6.                                                                                                 | 477           | Study Design             |
| Singh P, Arreved PS, Peterson GM, Bereznicki LR. Evaluation of antithrombotic usage for atrial fibrillation in aged care facilities. <i>J Clin Pharm Ther</i> 2011 Apr;36(2):166-71.                                                                                           | 115           | Study Design             |
| Singla NK, Ballard JL, Moneta G, Randleman Jr CD, Renkens KL, Alexander WA. A Phase 3b, Open-Label, Single-Group Immunogenicity and Safety Study of Topical Recombinant Thrombin in Surgical Hemostasis. <i>Journal of the American College of Surgeons</i> 2009;209(1):68-74. | 796           | Intervention/Comparators |
| Siu CW, Jim MH, Lau CP, Tse HF. Low molecular weight heparin versus unfractionated heparin for thromboprophylaxis in patients with acute atrial fibrillation: A randomized control trial. <i>Acute Cardiac Care</i> 2011;13(3):196-8.                                          | 670           | Intervention/Comparators |
| Sjalander A, Wallentin L, Rosenqvist M, Svensson P. [Antithrombotic treatment in atrial fibrillation. Background to new recommendations and therapeutic alternative]. <i>Lakartidningen</i> 2008 Sep 10;105(37):2478-80.                                                       | 197           | Study Design             |
| Sloan MA, Price TR, Terrin ML, Forman S, Gore JM, Chaitman BR, et al. Ischemic cerebral infarction after rt-PA and heparin therapy for acute myocardial infarction: The TIMI-II pilot and randomized clinical trial combined experience. <i>Stroke</i> 1997;28(6):1107-14.     | 1111          | Study Population         |
| Smith DE, Pattison HM, Lip GYH, Lanef DA. Intensive educational intervention improves time in therapeutic range in atrial fibrillation patients initiating warfarin: Results from the TREAT study. <i>European Heart Journal</i> 2012;33:56.                                   | 576           | Intervention/Comparators |
| Smith DE, Xuereb CB, Pattison HM, Lip GY, Lane DA. TRial of an Educational intervention on patients' knowledge of Atrial fibrillation and anticoagulant therapy, INR control, and outcome of Treatment with warfarin (TREAT). <i>BMC Cardiovasc Disord</i> 2010;10:21.         | 145           | Intervention/Comparators |
| Snowden S, Silus L. Oral anticoagulation with warfarin for patients with left ventricular systolic dysfunction. <i>Cardiol Rev</i> 2011 Jan;19(1):36-40.                                                                                                                       | 131           | Study Population         |
| Soff GA. A new generation of oral direct anticoagulants. <i>Arteriosclerosis, Thrombosis, and Vascular Biology</i> 2012;32(3):569-74.                                                                                                                                          | 622           | Study Design             |
| Somani B, Kommu SS, Cohen N, McClinton S. Outcome of ureteroscopy for stone disease in patients with bleeding diathesis: results from a systematic review of literature. <i>Journal of Urology</i> 2011;185(4):e774-e775.                                                      | 711           | Study Population         |
| Somberg JC. The impact of comorbidities on stroke prophylaxis strategies in atrial fibrillation patients. <i>American Journal of Therapeutics</i> 2011;18(6):510-7.                                                                                                            | 652           | Study Design             |

| <b>Reference</b>                                                                                                                                                                                                                                                                                                                                                                             | <b>Ref ID</b> | <b>Reason</b>            |
|----------------------------------------------------------------------------------------------------------------------------------------------------------------------------------------------------------------------------------------------------------------------------------------------------------------------------------------------------------------------------------------------|---------------|--------------------------|
| Sopher SM, Camm AJ. Atrial fibrillation: Maintenance of sinus rhythm versus rate control. American Journal of Cardiology 1996;77(3):24A-37A.                                                                                                                                                                                                                                                 | 1127          | Study Design             |
| Sorensen R, Olesen JB, Charlott M, Gislason GH. Risk of bleeding related to antithrombotic treatment in cardiovascular disease. Current Pharmaceutical Design 2012;18(33):5362-78.                                                                                                                                                                                                           | 523           | Study Design             |
| Sorino M, Colonna P, De LL, Carerj S, Oliva E, De Tommasi SM, et al. Post-cardioversion transesophageal echocardiography (POSTEC) strategy with the use of enoxaparin for brief anticoagulation in atrial fibrillation patients: the multicenter POSTEC trial (a pilot study). J Cardiovasc Med (Hagerstown ) 2007 Dec;8(12):1034-42.                                                        | 211           | Study Design             |
| Spencer F, Becker RC. Current approach to antithrombotic therapy: An abbreviated reference for practicing clinicians. Journal of Thrombosis and Thrombolysis 1996;3(4):307-25.                                                                                                                                                                                                               | 1118          | Study Design             |
| Stabile G, Bertaglia E, Senatore G, De Simone A, Zoppo F, Donnici G, et al. Catheter ablation treatment in patients with drug-refractory atrial fibrillation: A prospective, multi-centre, randomized, controlled study (Catheter Ablation for the Cure of Atrial Fibrillation Study). European Heart Journal 2006;27(2):216-21.                                                             | 903           | Intervention/Comparators |
| Stangier J, Rathgen K, Stahle H, Reseski K, Kornicke T, Roth W. Coadministration of dabigatran etexilate and atorvastatin: assessment of potential impact on pharmacokinetics and pharmacodynamics. Am J Cardiovasc Drugs 2009;9(1):59-68.                                                                                                                                                   | 193           | Study Design             |
| Steffel J. Novel plasmatic anticoagulants in acute coronary syndromes. Hamostaseologie 2012;32(1):A3.                                                                                                                                                                                                                                                                                        | 566           | Study Design             |
| Steffensen FH, Sorensen HT, Olesen F. Impact of local evidence-based clinical guidelines--a Danish intervention study. Fam Pract 1997 Jun;14(3):209-15.                                                                                                                                                                                                                                      | 442           | Study Population         |
| Steib A, Barre J, Mertes M, Morel MH, Nathan N, Ozier Y, et al. Can oral vitamin K before elective surgery substitute for preoperative heparin bridging in patients on vitamin K antagonists? Journal of Thrombosis and Haemostasis 2010;8(3):499-503.                                                                                                                                       | 768           | Intervention/Comparators |
| Stellbrink C, Hanrath P, Nixdorff U, Hofmann T, Lehmacher W, Kuhle K, et al. Low molecular weight heparin for prevention of thromboembolic complications in cardioversion--rationale and design of the ACE study (Anticoagulation in Cardioversion using Enoxaparin). Z Kardiol 2002 Mar;91(3):249-54.                                                                                       | 363           | Intervention/Comparators |
| Stellbrink C, Nixdorff U, Hofmann T, Lehmacher W, Daniel WG, Hanrath P, et al. Safety and efficacy of enoxaparin compared with unfractionated heparin and oral anticoagulants for prevention of thromboembolic complications in cardioversion of nonvalvular atrial fibrillation: the Anticoagulation in Cardioversion using Enoxaparin (ACE) trial. Circulation 2004 Mar 2;109(8):997-1003. | 324           | Intervention/Comparators |
| Stellbrink C, Nixdorff U, Hofmann T, Lehmacher W, Daniel WG, Hanrath P, et al. Use of subcutaneous enoxaparin compared to intravenous heparin and oral phenprocoumon in the setting of cardioversion--the ACE study (Anticoagulation in Cardioversion using Enoxaparin). Card Electrophysiol Rev 2003 Dec;7(4):382-6.                                                                        | 318           | Intervention/Comparators |
| Steurer J. New anticoagulants are somewhat more effective than warfarin in non-valvular atrial fibrillation and venous thromboembolisms. Praxis 2012;101(24):1577-8.                                                                                                                                                                                                                         | 528           | Study Design             |

| Reference                                                                                                                                                                                                                                                            | Ref ID | Reason                   |
|----------------------------------------------------------------------------------------------------------------------------------------------------------------------------------------------------------------------------------------------------------------------|--------|--------------------------|
| Stoddard MF, Dawkins PR, Prince CR, Longaker RA. Transesophageal echocardiographic guidance of cardioversion in patients with atrial fibrillation. <i>American Heart Journal</i> 1995;129(6):1204-15.                                                                | 1135   | Intervention/Comparators |
| Stollberger C, Chnupa P, Kronik G, Bachl C, Brainin M, Schneider B, et al. Are spontaneous echo contrast, left atrial/appendage thrombi and left atrial appendage size predictors for embolism? <i>Wiener Medizinische Wochenschrift</i> 1997;147(2):46+48-46+51.    | 1114   | Study Design             |
| Stone S, Holden A, Knapic N, Ansell J. Comparison between videotape and personalized patient education for anticoagulant therapy. <i>J Fam Pract</i> 1989 Jul;29(1):55-7.                                                                                            | 503    | Intervention/Comparators |
| Stop press focus on RE-COVER study. <i>Cardiovascular Journal of Africa</i> 2010;21(1):59-60.                                                                                                                                                                        | 777    | Study Design             |
| Strach K, Meyer C, Hackenbroch M, Tiemann K, Haase J, Pizulli L, et al. [Long-term fate of left atrial thrombi and incidence of cerebral embolism under continuous anticoagulation therapy]. <i>Rofo</i> 2005 Dec;177(12):1706-12.                                   | 275    | Study Design             |
| Strain J, Templeton K. Is Apixaban (Eliquis) the "ideal" anticoagulant to replace warfarin for stroke prevention in atrial fibrillation? <i>S D Med</i> 2013 Jan;66(1):20-1.                                                                                         | 6      | Study Population         |
| Straus SE, Majumdar SR, McAlister FA. New evidence for stroke prevention: Scientific review. <i>Journal of the American Medical Association</i> 2002;288(11):1388-95.                                                                                                | 1007   | Study Design             |
| Sturm JW, Davis SM, O'Sullivan JG, Vedadhaghi ME, Donnan GA. The Avoid Stroke As Soon As Possible (ASAP) general practice stroke audit. <i>Medical Journal of Australia</i> 2002;176(7):312-6.                                                                       | 1018   | Study Design             |
| Sullivan JM, Harken DE, Gorlin R. Pharmacologic control of thromboembolic complications of cardiac-valve replacement. A preliminary report. <i>N Engl J Med</i> 1968 Sep 12;279(11):576-80.                                                                          | 507    | Study Population         |
| Sutton AJ, Cooper NJ, Abrams KR, Lambert PC, Jones DR. A Bayesian approach to evaluating net clinical benefit allowed for parameter uncertainty. <i>J Clin Epidemiol</i> 2005 Jan;58(1):26-40.                                                                       | 297    | Study Design             |
| Svemarker S, Haggmark S, Jansson E, Lindholm R, Appelblad M, Sandstrom E, et al. Use of heparin-bonded circuits in cardiopulmonary bypass improves clinical outcome. <i>Scandinavian Cardiovascular Journal</i> 2002;36(4):241-6.                                    | 1008   | Intervention/Comparators |
| Svenmarker S, Sandstrom E, Karlsson T, Haggmark S, Jansson E, Appelblad M, et al. Neurological and general outcome in low-risk coronary artery bypass patients using heparin coated circuits. <i>European Journal of Cardio-thoracic Surgery</i> 2001;19(1):47-53.   | 1056   | Study Population         |
| Svensson PJ, Frykman V, Sjaander A, Rosenqvist M, Wallentin L. TIR - Results from the national quality registry for anticoagulation treatment in Sweden. <i>Journal of Thrombosis and Haemostasis</i> 2009;7(S2):1068.                                               | 794    | Study Design             |
| Taha AS, McCloskey C, Prasad R, Bezlyak V. Famotidine for the prevention of peptic ulcers and oesophagitis in patients taking low-dose aspirin (FAMOUS): a phase III, randomised, double-blind, placebo-controlled trial. <i>The Lancet</i> 2009;374(9684):119-25.   | 791    | Intervention/Comparators |
| Tahir H, Jackson LL, Warnock DG. Antiproteinuric therapy and fabry nephropathy: Sustained reduction of proteinuria in patients receiving enzyme replacement therapy with agalsidase-(beta). <i>Journal of the American Society of Nephrology</i> 2007;18(9):2609-17. | 857    | Study Population         |
| Talati R, White MC. Dabigatran: A new orally available anticoagulant for prevention of strokes and thrombosis in patients with atrial fibrillation. <i>Formulary</i> 2011;46(2):44-53.                                                                               | 715    | Study Design             |

| <b>Reference</b>                                                                                                                                                                                                                                                                                                                                                                         | <b>Ref ID</b> | <b>Reason</b>            |
|------------------------------------------------------------------------------------------------------------------------------------------------------------------------------------------------------------------------------------------------------------------------------------------------------------------------------------------------------------------------------------------|---------------|--------------------------|
| Tangelder MJ, Frison L, Weaver D, Wilcox RG, Bylock A, Emanuelsson H, et al. Effect of ximelagatran on ischemic events and death in patients with atrial fibrillation after acute myocardial infarction in the efficacy and safety of the oral direct thrombin inhibitor ximelagatran in patients with recent myocardial damage (ESTEEM) trial. <i>Am Heart J</i> 2008 Feb;155(2):382-7. | 210           | Intervention/Comparators |
| Tapson VF, Hyers TM, Waldo AL, Ballard DJ, Becker RC, Caprini JA, et al. Antithrombotic therapy practices in US hospitals in an era of practice guidelines. <i>Arch Intern Med</i> 2005 Jul 11;165(13):1458-64.                                                                                                                                                                          | 285           | Study Population         |
| Taylor D. Issues in stroke. <i>Pharmaceutical Journal</i> 1998;260(6988):489-91.                                                                                                                                                                                                                                                                                                         | 1101          | Study Design             |
| Taylor FC, Cohen H, Ebrahim S. Systematic review of long term anticoagulation or antiplatelet treatment in patients with non-rheumatic atrial fibrillation (Structured abstract). <i>BMJ</i> 2001;322:321-6.                                                                                                                                                                             | 1177          | Study Design             |
| Taylor J. Novel oral anticoagulants for stroke prevention in atrial fibrillation. <i>Eur Heart J</i> 2012 Jun;33(12):1419-20.                                                                                                                                                                                                                                                            | 27            | Study Design             |
| Teitelbaum JS, von KR, Gjesdal K, Kristinsson A, Gahn G, Albers GW. Effect of ximelagatran and warfarin on stroke subtypes in atrial fibrillation. <i>Can J Neurol Sci</i> 2008 May;35(2):160-5.                                                                                                                                                                                         | 203           | Intervention/Comparators |
| Tejan-Sie SA, Murray RD, Black IW, Jasper SE, Apperson-Hansen C, Li J, et al. Spontaneous Conversion of Patients with Atrial Fibrillation Scheduled for Electrical Cardioversion: An ACUTE Trial Ancillary Study. <i>J Am Coll Cardiol</i> 2003;42(9):1638-43.                                                                                                                           | 969           | Intervention/Comparators |
| Tendera M, Syzdol M, Parma Z. ARISTOTLE RE-LYs on the ROCKET. What's new in stroke prevention in patients with atrial fibrillation? <i>Cardiology Journal</i> 2012;19(1):4-10.                                                                                                                                                                                                           | 630           | Study Design             |
| Testa L, Andreotti F, Biondi Zoccai GG, Burzotta F, Bellocci F, Crea F. Ximelagatran/melagatran against conventional anticoagulation: a meta-analysis based on 22,639 patients. <i>Int J Cardiol</i> 2007 Nov 15;122(2):117-24.                                                                                                                                                          | 244           | Intervention/Comparators |
| Thambidorai SK, Murray RD, Parakh K, Shah TK, Black IW, Jasper SE, et al. Utility of transesophageal echocardiography in identification of thrombogenic milieu in patients with atrial fibrillation (an ACUTE Ancillary Study). <i>American Journal of Cardiology</i> 2005;96(7):935-41.                                                                                                 | 914           | Intervention/Comparators |
| The alternative to warfarin for selected patients. <i>Prescrire International</i> 2012;21(124):33-6.                                                                                                                                                                                                                                                                                     | 631           | Study Design             |
| Thibault B, Talajic M, Dubuc M, Guerra P, Gagne P, Roy D, et al. Thromboembolic events occur despite sinus rhythm maintenance in patients treated for atrial fibrillation: The Canadian Trial of Atrial Fibrillation experience. <i>Can J Cardiol</i> 2004 Feb;20(2):195-9.                                                                                                              | 320           | Study Design             |
| Thompson CA. Ximelagatran data fail to impress FDA. <i>Am J Health Syst Pharm</i> 2004 Dec 1;61(23):2472, 2474-5, 2480.                                                                                                                                                                                                                                                                  | 300           | Study Design             |
| Thomson R, Eccles M, Wood R, Chinn DJ. A cautionary note on data sources for evidence-based clinical decisions: warfarin and stroke prevention. <i>Med Decis Making</i> 2007 Jul;27(4):438-47.                                                                                                                                                                                           | 225           | Study Design             |
| Thomson R, Parkin D, Eccles M, Sudlow M, Robinson A. Decision analysis and guidelines for anticoagulant therapy to prevent stroke in patients with atrial fibrillation. <i>Lancet</i> 2000 Mar 18;355(9208):956-62.                                                                                                                                                                      | 398           | Study Design             |

| Reference                                                                                                                                                                                                                                                                                | Ref ID | Reason                   |
|------------------------------------------------------------------------------------------------------------------------------------------------------------------------------------------------------------------------------------------------------------------------------------------|--------|--------------------------|
| Thomson R, Robinson A, Greenaway J, Lowe P. Development and description of a decision analysis based decision support tool for stroke prevention in atrial fibrillation. <i>Qual Saf Health Care</i> 2002 Mar;11(1):25-31.                                                               | 359    | Intervention/Comparators |
| Thomson RG, Eccles MP, Steen IN, Greenaway J, Stobbart L, Murtagh MJ, et al. A patient decision aid to support shared decision-making on anti-thrombotic treatment of patients with atrial fibrillation: randomised controlled trial. <i>Qual Saf Health Care</i> 2007 Jun;16(3):216-23. | 231    | Intervention/Comparators |
| Tinmouth AH, Morrow BH, Cruickshank MK, Moore PM, Kovacs MJ. Dalteparin as periprocedure anticoagulation for patients on warfarin and at high risk of thrombosis. <i>Ann Pharmacother</i> 2001 Jun;35(6):669-74.                                                                         | 373    | Study Population         |
| Tipping B, Kalula S, Badri M. The burden and risk factors for adverse drug events in older patients - A prospective cross-sectional study. <i>South African Medical Journal</i> 2006;96(12 I):1255-9.                                                                                    | 882    | Study Design             |
| Tischenko A, Gula LJ, Yee R, Klein GJ, Skanes AC, Krahn AD. Implantation of cardiac rhythm devices without interruption of oral anticoagulation compared with perioperative bridging with low-molecular weight heparin. <i>American Heart Journal</i> 2009;158(2):252-6.                 | 789    | Study Population         |
| Tonkin AM, Dujovne CA. Further evidence of the need to establish treatment safety as well as efficacy in randomized controlled trials. <i>Current Opinion in Lipidology</i> 2002;13(6):591-3.                                                                                            | 1003   | Study Design             |
| Torp-Pedersen C. Heart failure and thrombotic complications. <i>Pathophysiology of Haemostasis and Thrombosis</i> 2010;37:79.                                                                                                                                                            | 749    | Study Population         |
| Transesophageal echocardiographic correlates of thromboembolism in high-risk patients with nonvalvular atrial fibrillation. The Stroke Prevention in Atrial Fibrillation Investigators Committee on Echocardiography. <i>Ann Intern Med</i> 1998 Apr 15;128(8):639-47.                   | 430    | Study Design             |
| Tse HF, Reek S, Timmermans C, Lai-Fun Lee K, Geller JC, Rodriguez LM, et al. Pulmonary vein isolation using transvenous catheter cryoablation for treatment of atrial fibrillation without risk of pulmonary vein stenosis. <i>J Am Coll Cardiol</i> 2003;42(4):752-8.                   | 986    | Intervention/Comparators |
| Tse HF, Wang Q, Yu CM, Ayers GM, Lau CP. Time course of recovery of left atrial mechanical dysfunction after cardioversion of spontaneous atrial fibrillation with the implantable atrial defibrillator. <i>American Journal of Cardiology</i> 2000;86(9):1023-5.                        | 1062   | Intervention/Comparators |
| Tu HT, Campbell BC, Christensen S, Butcher KS, Collins M, Parsons MW, et al. The effects of atrial fibrillation on infarct evolution and outcome. <i>Stroke</i> 2010;41(4):e337.                                                                                                         | 766    | Intervention/Comparators |
| Tu RH, Zhong GQ, Zeng ZY, Wu WF, He Y. [A meta-analysis on efficacy of anti-platelet agents and anticoagulants for preventing stroke in patients with nonvalvular atrial fibrillation]. <i>Zhonghua Xin Xue Guan Bing Za Zhi</i> 2011 Mar;39(3):262-7.                                   | 103    | Intervention/Comparators |
| Tuinenburg AE, Van Gelder IC, Van Den Berg MP, Brugemann J, De Kam PJ, Crijns HJ. Lack of prevention of heart failure by serial electrical cardioversion in patients with persistent atrial fibrillation. <i>Heart</i> 1999 Oct;82(4):486-93.                                            | 418    | Intervention/Comparators |
| Turpie AG, Gent M, Laupacis A, Latour Y, Gunstensen J, Basile F, et al. A comparison of aspirin with placebo in patients treated with warfarin after heart-valve replacement. <i>N Engl J Med</i> 1993 Aug 19;329(8):524-9.                                                              | 481    | Study Population         |

| Reference                                                                                                                                                                                                                                                                                                     | Ref ID | Reason                   |
|---------------------------------------------------------------------------------------------------------------------------------------------------------------------------------------------------------------------------------------------------------------------------------------------------------------|--------|--------------------------|
| Turpie AG, Gunstensen J, Hirsh J, Nelson H, Gent M. Randomised comparison of two intensities of oral anticoagulant therapy after tissue heart valve replacement. <i>Lancet</i> 1988 Jun 4;1(8597):1242-5.                                                                                                     | 505    | Intervention/Comparators |
| Turpie AGG, Kreutz R, Llau J, Norrving B, Haas S. Management consensus guidance for the use of rivaroxaban - an oral, direct factor Xa inhibitor. <i>Thrombosis and Haemostasis</i> 2012;108(5):876-86.                                                                                                       | 565    | Study Design             |
| Turpie AGG, Lip GYH, Minematsu K, Goto S, Renfurm RW, Wong KSL. Safety and tolerability of YM150 in subjects with non-valvular atrial fibrillation: A phase II study. <i>European Heart Journal</i> 2010;31:173.                                                                                              | 742    | Intervention/Comparators |
| Tveit A, Bollmann A, Seljeflot I, Husser D, Stridh M, Sornmo L, et al. Relation between atrial fibrillatory rate and markers of inflammation and haemostasis in persistent human atrial fibrillation. <i>Thrombosis and Haemostasis</i> 2009;101(3):601-3.                                                    | 812    | Study Design             |
| Tveit A, Grundvold I, Olufsen M, Seljeflot I, Abdelnoor M, Arnesen H, et al. Candesartan in the prevention of relapsing atrial fibrillation. <i>International Journal of Cardiology</i> 2007;120(1):85-91.                                                                                                    | 858    | Intervention/Comparators |
| Tzeis S, Andrikopoulos G. Novel anticoagulants for atrial fibrillation: A critical appraisal. <i>Angiology</i> 2012;63(3):164-70.                                                                                                                                                                             | 608    | Study Design             |
| Uchiyama S. [Expectation to and problems of thrombin inhibitor]. <i>Rinsho Shinkeigaku</i> 2011 Nov;51(11):1004-6.                                                                                                                                                                                            | 65     | Study Design             |
| Uchiyama S. EBM of cerebral infarction: Message from mega-studies. <i>Clinical Neurology</i> 2003;43(11):884-6.                                                                                                                                                                                               | 970    | Study Design             |
| Ueno H, Naka H, Ohshita T, Kondo K, Nomura E, Ohtsuki T, et al. Association between cerebral microbleeds on T2*-weighted MR images and recurrent hemorrhagic stroke in patients treated with warfarin following ischemic stroke. <i>AJNR Am J Neuroradiol</i> 2008 Sep;29(8):1483-6.                          | 204    | Study Design             |
| Urabe T, Tanaka R, Noda K, Mizuno Y. Anticoagulant therapy with a selective thrombin inhibitor for acute cerebral infarction: Usefulness of coagulation markers for evaluation of efficacy. <i>Journal of Thrombosis and Thrombolysis</i> 2002;13(3):155-60.                                                  | 1016   | Study Design             |
| Urbano LA, Bogousslavsky J. Antiplatelet drugs in ischemic stroke prevention: From monotherapy to combined treatment. <i>Cerebrovascular Diseases</i> 2004;17(SUPPL. 1):74-80.                                                                                                                                | 966    | Study Design             |
| Van Geest-Daalderop JHH, Hutten BA, Pequeriaux NCV, Levi M, Sturk A. Improvement in the regulation of the vitamin K antagonist acenocoumarol after a standard initial dose regimen: Prospective validation of a prescription model. <i>Journal of Thrombosis and Thrombolysis</i> 2009;27(2):207-14.          | 810    | Study Design             |
| Van Gelder IC, Hagens VE, Bosker HA, Kingma JH, Kamp O, Kingma T, et al. A comparison of rate control and rhythm control in patients with recurrent persistent atrial fibrillation. <i>N Engl J Med</i> 2002 Dec 5;347(23):1834-40.                                                                           | 347    | Intervention/Comparators |
| van KJ, Lappegard KT, Sexton J, Plesiewicz I, Lap P, Bouwels L, et al. Persisting thrombin activity in elderly patients with atrial fibrillation on oral anticoagulation is decreased by anti-inflammatory therapy with intensive cholesterol-lowering treatment. <i>J Clin Lipidol</i> 2011 Jul;5(4):273-80. | 96     | Intervention/Comparators |



| Reference                                                                                                                                                                                                                                                                                                                                                                                                                       | Ref ID | Reason                   |
|---------------------------------------------------------------------------------------------------------------------------------------------------------------------------------------------------------------------------------------------------------------------------------------------------------------------------------------------------------------------------------------------------------------------------------|--------|--------------------------|
| Van Latum JC, Vermeulen PC, Den Ouden A, Mast B, Koudstaal PJ, Bogousslavsky J, et al. Secondary prevention in non-rheumatic atrial fibrillation after transient ischaemic attack or minor stroke. <i>Lancet</i> 1993;342(8882):1255-62.                                                                                                                                                                                        | 1156   | Intervention/Comparators |
| Van Leeuwen Y, Rombouts EK, Kruihof CJ, van der Meer FJM, Rosendaal FR. Improved control of oral anticoagulant dosing: A randomized controlled trial comparing two computer algorithms. <i>Journal of Thrombosis and Haemostasis</i> 2007;5(8):1644-9.                                                                                                                                                                          | 859    | Intervention/Comparators |
| Van Schie RMF, Wadelius M, Kamali F, Daly AK, Manolopoulos VG, De Boer A, et al. Genotype-guided dosing of coumarin derivatives: The European pharmacogenetics of anticoagulant therapy (EU-PACT) trial design. <i>Pharmacogenomics</i> 2009;10(10):1687-95.                                                                                                                                                                    | 778    | Study Design             |
| Van Spall HG, Wallentin L, Yusuf S, Eikelboom JW, Nieuwlaat R, Yang S, et al. Variation in warfarin dose adjustment practice is responsible for differences in the quality of anticoagulation control between centers and countries: an analysis of patients receiving warfarin in the randomized evaluation of long-term anticoagulation therapy (RE-LY) trial. <i>Circulation</i> 2012 Nov 6;126(19):2309-16.                 | 24     | Intervention/Comparators |
| van W, I, Koudstaal PJ, Kappelle LJ, van GJ, Gorter JW, Algra A. Long-term occurrence of death and cardiovascular events in patients with transient ischaemic attack or minor ischaemic stroke: comparison between arterial and cardiac source of the index event. <i>J Neurol Neurosurg Psychiatry</i> 2008 Aug;79(8):895-9.                                                                                                   | 212    | Study Population         |
| van Zuilen EV. [Anticoagulants in non-rheumatic atrium fibrillation]. <i>Ned Tijdschr Geneesk</i> 1991 Nov 23;135(47):2204-8.                                                                                                                                                                                                                                                                                                   | 490    | Study Design             |
| Varma S, McElnay JC, Hughes CM, Passmore AP, Varma M. Pharmaceutical care of patients with congestive heart failure: Interventions and outcomes. <i>Pharmacotherapy</i> 1999;19(7):860-9.                                                                                                                                                                                                                                       | 1082   | Intervention/Comparators |
| Vazquez Ruiz de CE, Martin RA, Pousibet SH, Lozano CC, Guzman HM, Tarabini CA, et al. [The use of anticoagulant treatment in patients with nonrheumatic atrial fibrillation]. <i>Rev Esp Cardiol</i> 2000 Feb;53(2):200-4.                                                                                                                                                                                                      | 399    | Study Design             |
| Vemmos KN, Tsivgoulis G, Spengos K, Manios E, Xinos K, Vassilopoulou S, et al. Primary prevention of arterial thromboembolism in the oldest old with atrial fibrillation - A randomized pilot trial comparing adjusted-dose and fixed low-dose coumadin with aspirin. <i>European Journal of Internal Medicine</i> 2006;17(1):48-52.                                                                                            | 902    | Study Design             |
| Verdecchia P, Dagenais G, Healey J, Gao P, Dans AL, Chazova I, et al. Blood pressure and other determinants of new-onset atrial fibrillation in patients at high cardiovascular risk in the Ongoing Telmisartan Alone and in Combination With Ramipril Global Endpoint Trial/Telmisartan Randomized Assessment Study in ACE iNtolerant subjects with cardiovascular Disease studies. <i>J Hypertens</i> 2012 May;30(5):1004-14. | 50     | Study Design             |
| Verma A, Mantovan R, Macle L, De MG, Chen J, Morillo CA, et al. Substrate and Trigger Ablation for Reduction of Atrial Fibrillation (STAR AF): a randomized, multicentre, international trial. <i>Eur Heart J</i> 2010 Jun;31(11):1344-56.                                                                                                                                                                                      | 148    | Intervention/Comparators |
| Verma A, Newman D, Geist M, Greenhut S, Laslop J, DeBellis L, et al. Effects of rhythm regularization and rate control in improving left ventricular function in atrial fibrillation patients undergoing atrioventricular nodal ablation. <i>Canadian Journal of Cardiology</i> 2001;17(4):437-45.                                                                                                                              | 1046   | Intervention/Comparators |

| Reference                                                                                                                                                                                                                                                                                                                                                                                                                       | Ref ID | Reason                   |
|---------------------------------------------------------------------------------------------------------------------------------------------------------------------------------------------------------------------------------------------------------------------------------------------------------------------------------------------------------------------------------------------------------------------------------|--------|--------------------------|
| Verret L, Couturier J, Rozon A, Saudrais-Janecek S, St-Onge A, Nguyen A, et al. Impact of a pharmacist-led warfarin self-management program on quality of life and anticoagulation control: A randomized trial. <i>Pharmacotherapy</i> 2012;32(10):871-9.                                                                                                                                                                       | 557    | Intervention/Comparators |
| Veyrat-Follet C, Vivier N, Trelu M, Dubruc C, Sanderink GJ. The pharmacokinetics of idraparinux, a long-acting indirect factor Xa inhibitor: Population pharmacokinetic analysis from Phase III clinical trials. <i>Journal of Thrombosis and Haemostasis</i> 2009;7(4):559-65.                                                                                                                                                 | 806    | Study Design             |
| Vikatmaa P, Sairanen T, Lindholm JM, Capraro L, Lepantalo M, Venermo M. Structure of delay in carotid surgery - An observational study. <i>European Journal of Vascular and Endovascular Surgery</i> 2011;42(3):273-9.                                                                                                                                                                                                          | 673    | Study Population         |
| Viles-Gonzalez JF, Kar S, Douglas P, Dukkipati S, Feldman T, Horton R, et al. The clinical impact of incomplete left atrial appendage closure with the Watchman Device in patients with atrial fibrillation: a PROTECT AF (Percutaneous Closure of the Left Atrial Appendage Versus Warfarin Therapy for Prevention of Stroke in Patients With Atrial Fibrillation) substudy. <i>J Am Coll Cardiol</i> 2012 Mar 6;59(10):923-9. | 59     | Intervention/Comparators |
| Voller H, Glatz J, Taborski U, Bernardo A, Dovifat C, Burkard G, et al. [Background and evaluation plan of a study on self-management of anticoagulation in patients with non-valvular atrial fibrillation (SMAAF Study)]. <i>Z Kardiologie</i> 2000 Apr;89(4):284-8.                                                                                                                                                           | 389    | Intervention/Comparators |
| Voller H, Glatz J, Taborski U, Bernardo A, Dovifat C, Burkard G, et al. Rationale and design of the self-management of anticoagulation in patients with non-valvular atrial fibrillation (SMAAF) study. <i>Zeitschrift fur Kardiologie</i> 2000;89(4):284-8.                                                                                                                                                                    | 1068   | Study Design             |
| Voller H, Glatz J, Taborski U, Bernardo A, Dovifat C, Heidinger K. Self-management of oral anticoagulation in nonvalvular atrial fibrillation (SMAAF study). <i>Z Kardiologie</i> 2005 Mar;94(3):182-6.                                                                                                                                                                                                                         | 295    | Intervention/Comparators |
| von Oppell UO, Masani N, O'Callaghan P, Wheeler R, Dimitrakakis G, Schiffelers S. Mitral valve surgery plus concomitant atrial fibrillation ablation is superior to mitral valve surgery alone with an intensive rhythm control strategy. <i>Eur J Cardiothorac Surg</i> 2009 Apr;35(4):641-50.                                                                                                                                 | 189    | Intervention/Comparators |
| Wagner M, Rindress D, Desjardins B, Meilleur MC, Ducharme A, Tardif JC. Economic impact of the reduced incidence of atrial fibrillation in patients with heart failure treated with enalapril. <i>American Heart Journal</i> 2005;150(5):985.                                                                                                                                                                                   | 910    | Study Design             |
| Waldo AL. Atrial fibrillation update: Overview and highlights of new information. <i>Cardiac Electrophysiology Review</i> 2001;5(2-3):158-61.                                                                                                                                                                                                                                                                                   | 1041   | Study Design             |
| Waldo AL. Management of atrial fibrillation: the need for AFFIRMative action. AFFIRM investigators. Atrial Fibrillation Follow-up Investigation of Rhythm Management. <i>Am J Cardiol</i> 1999 Sep 15;84(6):698-700.                                                                                                                                                                                                            | 415    | Intervention/Comparators |
| Walfridsson H, Johansson B, Englund A, Kenneback G, Schwieler J, Kongstad O, et al. Effects of AZD0837, a novel direct thrombin inhibitor, on the electrophysiological properties of the human heart: A randomized, double-blind, parallel-group, placebo-controlled study. <i>Clinical Drug Investigation</i> 2010;30(7):461-71.                                                                                               | 755    | Intervention/Comparators |
| Wallentin L. Local INR control had some effect on the benefits of dabigatran over warfarin for major bleeding in atrial fibrillation. <i>Annals of Internal Medicine</i> 2011;154(2):JC1-JC6.                                                                                                                                                                                                                                   | 719    | Study Design             |

| <b>Reference</b>                                                                                                                                                                                                                                                                                       | <b>Ref ID</b> | <b>Reason</b>            |
|--------------------------------------------------------------------------------------------------------------------------------------------------------------------------------------------------------------------------------------------------------------------------------------------------------|---------------|--------------------------|
| Walter SD, Sinclair JC. Uncertainty in the minimum event risk to justify treatment was evaluated. <i>J Clin Epidemiol</i> 2009 Aug;62(8):816-24.                                                                                                                                                       | 190           | Intervention/Comparators |
| Wang TH, Bhatt DL, Fox KAA, Steinhilber SR, Brennan DM, Hacke W, et al. An analysis of mortality rates with dual-antiplatelet therapy in the primary prevention population of the CHARISMA trial. <i>European Heart Journal</i> 2007;28(18):2200-7.                                                    | 856           | Intervention/Comparators |
| Warfarin as a stroke prevention agent in patients with atrial fibrillation. <i>Australian Journal of Pharmacy</i> 2012;93(1107):94.                                                                                                                                                                    | 578           | Study Design             |
| Warfarin or aspirin for non-rheumatic atrial fibrillation? <i>Drug and Therapeutics Bulletin</i> 1994;32(8):57-60.                                                                                                                                                                                     | 1144          | Study Design             |
| Warfarin versus aspirin in stroke prevention. <i>Medicine Today</i> 2002;3(2):10.                                                                                                                                                                                                                      | 1021          | Study Design             |
| Watzke HH, Forberg E, Svoboda G, Jimenez-Boj E, Kringner B. A prospective controlled trial comparing weekly self-testing and self-dosing with the standard management of patients on stable oral anticoagulation. <i>Thromb Haemost</i> 2000 May;83(5):661-5.                                          | 392           | Intervention/Comparators |
| Wazni OM, Beheiry S, Fahmy T, Barrett C, Hao S, Patel D, et al. Atrial fibrillation ablation in patients with therapeutic international normalized ratio: comparison of strategies of anticoagulation management in the periprocedural period. <i>Circulation</i> 2007 Nov 27;116(22):2531-4.          | 216           | Intervention/Comparators |
| Wazni OM, Marrouche NF, Martin DO, Verma A, Bhargava M, Saliba W, et al. Radiofrequency ablation vs antiarrhythmic drugs as first-line treatment of symptomatic atrial fibrillation: A randomized trial. <i>Journal of the American Medical Association</i> 2005;293(21):2634-40.                      | 923           | Intervention/Comparators |
| Weerasooriya R, Davis M, Powell A, Szili-Torok T, Shah C, Whalley D, et al. The Australian Intervention Randomized Control of Rate in Atrial Fibrillation Trial (AIRCRAFT). <i>J Am Coll Cardiol</i> 2003;41(10):1697-702.                                                                             | 994           | Intervention/Comparators |
| Wei JW, Wang JG, Huang Y, Liu M, Wu Y, Wong LKS, et al. Secondary prevention of ischemic stroke in Urban China. <i>Stroke</i> 2010;41(5):967-74.                                                                                                                                                       | 764           | Study Design             |
| Weibert RT, Yeager BF, Wittkowsky AK, Bussey HI, Wilson DB, Godwin JE, et al. A randomized, crossover comparison of warfarin products in the treatment of chronic atrial fibrillation. <i>Ann Pharmacother</i> 2000 Sep;34(9):981-8.                                                                   | 387           | Intervention/Comparators |
| Weigner MJ, Thomas LR, Patel U, Schwartz JG, Burger AJ, Douglas PS, et al. Early cardioversion of atrial fibrillation facilitated by transesophageal echocardiography: Short-term safety and impact on maintenance of sinus rhythm at 1 year. <i>American Journal of Medicine</i> 2001;110(9):694-702. | 1045          | Intervention/Comparators |
| Weir NU, Demchuk AM, Buchan AM, Hill MD. Stroke prevention: MATCHing therapy to the patient with TIA. <i>Postgraduate Medicine</i> 2005;117(1):26-30.                                                                                                                                                  | 938           | Study Design             |
| Weitz JI. Factor Xa and thrombin as targets for new oral anticoagulants. <i>Thrombosis Research</i> 2011;127(SUPPL. 2):S5-S12.                                                                                                                                                                         | 723           | Study Design             |
| Weitz JI. New oral anticoagulants: A view from the laboratory. <i>American Journal of Hematology</i> 2012;87(SUPPL. 1):S133-S136.                                                                                                                                                                      | 603           | Study Design             |
| Wells PS, Le GG, Tierney S, Carrier M. Practical application of the 10-mg warfarin initiation nomogram. <i>Blood Coagul Fibrinolysis</i> 2009 Sep;20(6):403-8.                                                                                                                                         | 181           | Intervention/Comparators |

| <b>Reference</b>                                                                                                                                                                                                                                                                                                            | <b>Ref ID</b> | <b>Reason</b>            |
|-----------------------------------------------------------------------------------------------------------------------------------------------------------------------------------------------------------------------------------------------------------------------------------------------------------------------------|---------------|--------------------------|
| Wenger MK. Atrial fibrillation at elderly age: The importance of stroke prevention. <i>American Journal of Geriatric Cardiology</i> 1997;6(1):35-9.                                                                                                                                                                         | 1116          | Study Design             |
| Wensley S, Keir S, Caine S, Mac MM. Additional risk factors in atrial fibrillation patients not receiving warfarin. <i>Age Ageing</i> 1999 Jul;28(4):355-7.                                                                                                                                                                 | 421           | Study Design             |
| Westphal K. Long-term oral anticoagulation: Evidence favors self-management. <i>MMW-Fortschritte der Medizin</i> 2004;146(42):58-9.                                                                                                                                                                                         | 942           | Study Design             |
| White HD, Gruber M, Feysi J, Kaatz S, Tse HF, Husted S, et al. Comparison of outcomes among patients randomized to warfarin therapy according to anticoagulant control: results from SPORTIF III and V. <i>Arch Intern Med</i> 2007 Feb 12;167(3):239-45.                                                                   | 238           | Intervention/Comparators |
| Wiegand UKH, LeJeune D, Boguschewski F, Bonnemeier H, Eberhardt F, Schunkert H, et al. Pocket hematoma after pacemaker or implantable cardioverter defibrillator surgery: Influence of patient morbidity, operation strategy, and perioperative antiplatelet/anticoagulation therapy. <i>Chest</i> 2004;126(4):1177-86.     | 944           | Intervention/Comparators |
| Wilson SJA, Wells PS, Kovacs MJ, Lewis GM, Martin J, Burton E, et al. Comparing the quality of oral anticoagulant management by anticoagulation clinics and by family physicians: A randomized controlled trial. <i>Canadian Medical Association Journal</i> 2003;169(4):293-8.                                             | 987           | Intervention/Comparators |
| Witt DM. Initiation and Reinitiation of Anticoagulation Therapy. <i>Seminars in Hematology</i> 2011;48(4):295-301.                                                                                                                                                                                                          | 665           | Study Design             |
| Witte K, Thackray S, Clark AL, Cooklin M, Cleland JG. Clinical trials update: IMPROVEMENT-HF, COPERNICUS, MUSTIC, ASPECT-II, APRICOT and HEART. <i>Eur J Heart Fail</i> 2000 Dec;2(4):455-60.                                                                                                                               | 383           | Study Design             |
| Wittkowsky AK. A systematic review and inventory of supplement effects on warfarin and other anticoagulants. <i>Thrombosis Research</i> 2005;117(1-2):81-6.                                                                                                                                                                 | 907           | Study Population         |
| Wolfram O, Hammwoehner M, Gramley F, Goette A. Update on pharmacologic approaches to prevent thromboembolism in atrial fibrillation: Are thrombin and factor Xa inhibitors the ultimate answer? <i>Current Vascular Pharmacology</i> 2011;9(3):350-7.                                                                       | 682           | Study Design             |
| Wolzt M, Eriksson UG, Gouya G, Leuchten N, Kapiotis S, Elg M, et al. Effect on perfusion chamber thrombus size in patients with atrial fibrillation during anticoagulant treatment with oral direct thrombin inhibitors, AZD0837 or ximelagatran, or with vitamin K antagonists. <i>Thromb Res</i> 2012 Apr;129(4):e83-e91. | 81            | Intervention/Comparators |
| Wolzt M, Samama MM, Kapiotis S, Ogata K, Mendell J, Kunitada S. Effect of edoxaban on markers of coagulation in venous and shed blood compared with fondaparinux. <i>Thromb Haemost</i> 2011 Jun;105(6):1080-90.                                                                                                            | 106           | Intervention/Comparators |
| Wroe CD. 22nd Congress of the European Society of Cardiology, Amsterdam. <i>International Journal of Clinical Practice</i> 2000;54(7):459-60.                                                                                                                                                                               | 1063          | Study Design             |
| Wyse DG, Waldo AL, DiMarco JP, Domanski MJ, Rosenberg Y, Schron EB, et al. A comparison of rate control and rhythm control in patients with atrial fibrillation. <i>N Engl J Med</i> 2002 Dec 5;347(23):1825-33.                                                                                                            | 348           | Intervention/Comparators |

| <b>Reference</b>                                                                                                                                                                                                                                                                                                           | <b>Ref ID</b> | <b>Reason</b>            |
|----------------------------------------------------------------------------------------------------------------------------------------------------------------------------------------------------------------------------------------------------------------------------------------------------------------------------|---------------|--------------------------|
| Wyse DG. Rhythm versus rate control trials in atrial fibrillation. <i>Journal of Cardiovascular Electrophysiology</i> 2003;14(9 SUPPL.):S35-S39.                                                                                                                                                                           | 983           | Intervention/Comparators |
| Wyse DG. Some Recent Randomized Clinical Trials in the Management of Atrial Fibrillation. <i>Journal of Interventional Cardiac Electrophysiology</i> 2003;9(2):223-8.                                                                                                                                                      | 976           | Study Design             |
| Ximelagatran matches warfarin in AF. <i>British Journal of Diabetes and Vascular Disease</i> 2003;3(6):442.                                                                                                                                                                                                                | 972           | Intervention/Comparators |
| Xu XS, Moore K, Burton P, Stuyckens K, Mueck W, Rossenu S, et al. Population pharmacokinetics and pharmacodynamics of rivaroxaban in patients with acute coronary syndromes. <i>British Journal of Clinical Pharmacology</i> 2012;74(1):86-97.                                                                             | 587           | Study Design             |
| Yamaguchi T. Optimal intensity of warfarin therapy for secondary prevention of stroke in patients with nonvalvular atrial fibrillation : a multicenter, prospective, randomized trial. Japanese Nonvalvular Atrial Fibrillation-Embolic Secondary Prevention Cooperative Study Group. <i>Stroke</i> 2000 Apr;31(4):817-21. | 382           | Intervention/Comparators |
| Yamase M, Nakazato Y, Daida H. Effectiveness of amiodarone versus bepridil in achieving conversion to sinus rhythm in patients with persistent atrial fibrillation: A randomised trial. <i>Heart</i> 2012;98(14):1067-71.                                                                                                  | 588           | Intervention/Comparators |
| Yamashita T, Ogawa S, Aizawa Y, Atarashi H, Inoue H, Ohe T, et al. Investigation of the optimal treatment strategy for atrial fibrillation in Japan : The J-RHYTHM (Japanese Rhythm Management Trial for Atrial Fibrillation) study design. <i>Circulation Journal</i> 2003;67(9):738-41.                                  | 982           | Intervention/Comparators |
| Yamashita T. Frontiers of anticoagulation therapy for atrial fibrillation. <i>Journal of Cardiology</i> 2011;58(1):1-5.                                                                                                                                                                                                    | 679           | Study Design             |
| Yamashita T. Therapy of atrial fibrillation: Rate control or rhythm control? <i>Respiration and Circulation</i> 2003;51(10):1049-53.                                                                                                                                                                                       | 977           | Study Design             |
| Yarmohammadi H, Varr BC, Puwanant S, Lieber E, Williams SJ, Klostermann T, et al. Role of CHADS2 score in evaluation of thromboembolic risk and mortality in patients with atrial fibrillation undergoing direct current cardioversion (from the ACUTE Trial Substudy). <i>Am J Cardiol</i> 2012 Jul 15;110(2):222-6.      | 49            | Study Design             |
| Yasaka M, Minematsu K, Yamaguchi T. Optimal intensity of international normalized ratio in warfarin therapy for secondary prevention of stroke in patients with non-valvular atrial fibrillation. <i>Internal Medicine</i> 2001;40(12):1183-8.                                                                             | 1027          | Intervention/Comparators |
| Yigit Z, Kucukoglu MS, Okcun B, Sansoy V, Guzelsoy D. The safety of low-molecular weight heparins for the prevention of thromboembolic events after cardioversion of atrial fibrillation. <i>Japanese Heart Journal</i> 2003;44(3):369-77.                                                                                 | 967           | Intervention/Comparators |
| Yokota Y, Tsumura Y, Takarada A, Kawai H, Yokoyama M. The effect of recent advances in pharmacologic management on the prognosis of dilated cardiomyopathy. <i>Japanese Circulation Journal</i> 1993;57(11):1038-46.                                                                                                       | 1158          | Study Population         |
| You JHS, Tsui KKN, Wong RSM, Cheng G. Cost-effectiveness of Dabigatran versus genotype-guided management of Warfarin therapy for stroke prevention in patients with Atrial fibrillation. <i>PLoS ONE</i> 2012;7(6).                                                                                                        | 590           | Study Design             |

| Reference                                                                                                                                                                                                                                                                                                                                                                                                           | Ref ID | Reason                   |
|---------------------------------------------------------------------------------------------------------------------------------------------------------------------------------------------------------------------------------------------------------------------------------------------------------------------------------------------------------------------------------------------------------------------|--------|--------------------------|
| Yousef ZR, Tandy SC, Tudor V, Jishi F, Trent RJ, Watson DK, et al. Warfarin for non-rheumatic atrial fibrillation: five year experience in a district general hospital. <i>Heart</i> 2004 Nov;90(11):1259-62.                                                                                                                                                                                                       | 305    | Study Design             |
| Zehnder BS, Schaer BA, Jeker U, Cron TA, Osswald S. Atrial fibrillation: estimated excess rate of stroke due to lacking adherence to guidelines. <i>Swiss Med Wkly</i> 2006 Dec 2;136(47-48):757-60.                                                                                                                                                                                                                | 243    | Intervention/Comparators |
| Zeuthen EL, Lassen JF, Husted SE. Haemostatic activity in patients with atrial fibrillation treated with low-molecular-weight heparin before and after electrical cardioversion. <i>Journal of Thrombosis and Thrombolysis</i> 2004;17(3):185-9.                                                                                                                                                                    | 956    | Intervention/Comparators |
| Zeuthen EL, Lassen JF, Husted SE. Is there a hypercoagulable phase during initiation of antithrombotic therapy with oral anticoagulants in patients with atrial fibrillation? <i>Thromb Res</i> 2003 Mar 15;109(5-6):241-6.                                                                                                                                                                                         | 337    | Intervention/Comparators |
| Zhao L, Zhang Z, Kolm P, Jasper S, Lewis C, Klein A, et al. Cost in the Use of Enoxaparin Compared With Unfractionated Heparin in Patients With Atrial Fibrillation Undergoing a Transesophageal Echocardiography-Guided Cardioversion (from Assessment of Cardioversion Using Transesophageal Echocardiography [ACUTE] II Randomized Multicenter Study). <i>American Journal of Cardiology</i> 2008;101(3):338-42. | 845    | Study Design             |
| Zhu BP, Fan L, Li XY. Long-term effect and reliability of warfarin and aspirin for primary prevention of cardio-cerebral vessels events in patients with peripheral arteriosclerotic occlusive disease: A randomized, single-blind, controlled clinical trial with two-year follow-up. <i>Chinese Journal of Clinical Rehabilitation</i> 2005;9(15):10-1.                                                           | 928    | Study Population         |
| Zimetbaum P. Amiodarone for atrial fibrillation. <i>New England Journal of Medicine</i> 2007;356(9):935-41+894.                                                                                                                                                                                                                                                                                                     | 868    | Study Design             |
| Zimmermann M. [Atrial fibrillation: anticoagulants or not?]. <i>Schweiz Med Wochenschr</i> 1994 Sep 3;124(35):1560-5.                                                                                                                                                                                                                                                                                               | 467    | Study Design             |
| Zolfaghari S, Harenberg J, Marx S, Wehling M. Indirect comparisons of the new oral anticoagulants in patients with non-valvular atrial fibrillation. <i>Blood</i> 2012;120(21).                                                                                                                                                                                                                                     | 536    | Study Design             |
| Zuo HJ, Su JL, Zeng H, Yuan BH, Yao CH. Anticoagulation treatment in real-life practice of patient with nonvalvular atrial fibrillation in Beijing city. <i>National Medical Journal of China</i> 2007;87(33):2328-31.                                                                                                                                                                                              | 854    | Study Design             |

## Level 2 Screening (n = 57)

|                                                                                                                                                                                                                                                                       |      |              |
|-----------------------------------------------------------------------------------------------------------------------------------------------------------------------------------------------------------------------------------------------------------------------|------|--------------|
| Adams HP, Jr. Antiplatelet aggregating versus anticoagulant agents in preventing early recurrent stroke among patients with atrial fibrillation. <i>Curr Neurol Neurosci Rep</i> 2001 Jan;1(1):11-2.                                                                  | 367  | Study Design |
| Agarwal S, Hachamovitch R, Menon V. Improvement in thromboembolic outcomes with warfarin in patients with non-valvular atrial fibrillation over the last two decades. <i>J Am Coll Cardiol</i> 2012;59(13):E1836.                                                     | 618  | Study Design |
| Aguilar M, I, Hart R, Pearce LA. Oral anticoagulants versus antiplatelet therapy for preventing stroke in patients with non-valvular atrial fibrillation and no history of stroke or transient ischemic attacks. <i>Cochrane Database of Systematic Reviews</i> 2007. | 1169 | Study Design |

| <b>Reference</b>                                                                                                                                                                                                                                                                  | <b>Ref ID</b> | <b>Reason</b>    |
|-----------------------------------------------------------------------------------------------------------------------------------------------------------------------------------------------------------------------------------------------------------------------------------|---------------|------------------|
| Andersen LV, Vestergaard P, Deichgraeber P, Lindholt JS, Mortensen LS, Frost L. Warfarin for the prevention of systemic embolism in patients with non-valvular atrial fibrillation: A meta-analysis. <i>Heart</i> 2008;94(12):1607-13.                                            | 822           | Study Design     |
| Artang R, Rome E, Vidaillet H. Dabigatran and myocardial infarction, drug or class effect. Meta-analysis of randomized trials with oral direct thrombin inhibitors. <i>J Am Coll Cardiol</i> 2012;59(13):E571.                                                                    | 619           | Study Design     |
| Baker WL, Phung O. Do differences exist between oral anticoagulants in patients with nonvalvular atrial fibrillation? an adjusted indirect comparison meta-analysis. <i>J Am Coll Cardiol</i> 2012;59(13):E597.                                                                   | 616           | Study Design     |
| Biondi Zoccai G, Marietta M, Malavasi V, Lotrionte M, D'Ascenzo F, Abbate A, et al. Comparative effectiveness of novel oral anticoagulants for atrial fibrillation: Evidence from pair-wise and warfarincontrolled network meta analyses. <i>Blood Transfusion</i> 2012;10:s61.   | 561           | Study Design     |
| Camm AJ. The RE-LY study: Randomized Evaluation of Long-term anticoagulant therapy: Dabigatran vs. warfarin. <i>European Heart Journal</i> 2009;30(21):2554-5.                                                                                                                    | 781           | Study Population |
| Capodanno D, Capranzano P, Giacchi G, Calvi V, Tamburino C. Novel oral anticoagulants versus warfarin in non-valvular atrial fibrillation: A meta-analysis of 50,578 patients. <i>Int J Cardiol</i> 2012 Apr 9.                                                                   | 51            | Study Design     |
| Chatterjee S, Sharma A, Uchino K, Biondi-Zoccai G, Lichstein E, Mukherjee D. Rivaroxaban use is associated with reduced risk of myocardial infarction-insights from a meta-analysis and trial sequential analysis of randomized clinical trials. <i>Circulation</i> 2012;126(21). | 533           | Study Design     |
| Connolly SJ. RELY: Randomized evaluation of long-term anticoagulant therapy. <i>European Journal of Heart Failure</i> 2009;11(12):1215.                                                                                                                                           | 780           | Study Population |
| Cooper NJ, Sutton AJ, Lu G, Khunti K. Mixed comparison of stroke prevention treatments in individuals with nonrheumatic atrial fibrillation. <i>Arch Intern Med</i> 2006 Jun 26;166(12):1269-75.                                                                                  | 256           | Study Design     |
| Cowburn P, Cleland JGF. SPAF-III results. <i>European Heart Journal</i> 1996;17(7):1129.                                                                                                                                                                                          | 1120          | Study Population |
| Cucherat M. Bias-corrected indirect comparison meta-analysis of new oral anticoagulant in atrial fibrillation. <i>Value in Health</i> 2012;15(7):A364.                                                                                                                            | 547           | Study Design     |
| Dentali F, Riva N, Crowther M, Turpie AGG, Lip GYH, Ageno W. Efficacy and safety of the novel oral anticoagulants in atrial fibrillation : A systematic review and meta-analysis of the literature. <i>Circulation</i> 2012;126(20):2381-91.                                      | 538           | Study Design     |
| Di PG, Palareti G. [The BAFTA study]. <i>G Ital Cardiol (Rome)</i> 2008 Nov;9(11):735-9.                                                                                                                                                                                          | 194           | Study Design     |
| Dogliotti A, Paolasso E, Giugliano RP. Novel Oral Anticoagulants in Atrial Fibrillation: A Meta-analysis of Large, Randomized, Controlled Trials vs Warfarin. <i>Clin Cardiol</i> 2013 Feb;36(2):61-7.                                                                            | 7             | Study Design     |

| <b>Reference</b>                                                                                                                                                                                                                                                                                     | <b>Ref ID</b> | <b>Reason</b>            |
|------------------------------------------------------------------------------------------------------------------------------------------------------------------------------------------------------------------------------------------------------------------------------------------------------|---------------|--------------------------|
| Edwards SJ, Hamilton V, Nherera L, Trevor N, Barton S. A mixed treatment comparison (MTC) to compare the efficacy of anti-thrombotic agents in the prevention of stroke and systemic embolism (SE) in patients with non-valvular atrial fibrillation (NVAf). <i>Value in Health</i> 2012;15(7):A363. | 546           | Study Design             |
| Gomez-Outes A, Terleira-Fernandez A, Suarez-Gea ML, Vargas-Castrillon E. New oral anticoagulants versus warfarin on primary and secondary prevention of stroke in patients with atrial fibrillation: A metaanalysis. <i>Basic and Clinical Pharmacology and Toxicology</i> 2012;111:32.              | 543           | Study Design             |
| Green CJ, Hadorn DC, Bassett K, Kazanjian A. Anticoagulation in chronic nonvalvular atrial fibrillation: a critical appraisal and meta-analysis. <i>Can J Cardiol</i> 1997 Sep;13(9):811-5.                                                                                                          | 439           | Study Design             |
| Harenberg J, Marx S, Diener HC, Lip GYH, Marder VJ, Wehling M, et al. Comparison of efficacy and safety of dabigatran, rivaroxaban and apixaban in patients with atrial fibrillation using network meta-analysis. <i>International Angiology</i> 2012;31(4):330-9.                                   | 571           | Study Design             |
| Harenberg J, Marx S, Krejczy M, Weiss C. Indirect comparison of new oral anticoagulants for patients with atrial fibrillation using network meta-analysis. <i>Hamostaseologie</i> 2012;32(1):A72.                                                                                                    | 562           | Study Design             |
| Hart RG, Benavente O, McBride R, Pearce LA. Antithrombotic therapy to prevent stroke in patients with atrial fibrillation: a meta-analysis. <i>Ann Intern Med</i> 1999 Oct 5;131(7):492-501.                                                                                                         | 414           | Study Design             |
| Hart RG, Pearce LA, Aguilar MI. Meta-analysis: antithrombotic therapy to prevent stroke in patients who have nonvalvular atrial fibrillation. <i>Ann Intern Med</i> 2007 Jun 19;146(12):857-67.                                                                                                      | 227           | Study Design             |
| Jacobs LG. The sin of omission: a systematic review of antithrombotic therapy to prevent stroke in atrial fibrillation. <i>J Am Geriatr Soc</i> 2001 Jan;49(1):91-4.                                                                                                                                 | 379           | Study Design             |
| Koefoed BG, Feddersen C, Gullov AL, Petersen P. Effect of fixed minidose warfarin, conventional dose warfarin and aspirin on INR and prothrombin fragment 1 + 2 in patients with atrial fibrillation. <i>Thromb Haemost</i> 1997 May;77(5):845-8.                                                    | 443           | Outcomes                 |
| Koretsune Y, Inoue H, Kawai Y, Uchiyama S, Yamaguchi T. The oral factor Xa inhibitor DU-176b in Japanese warfarin-naive patients with atrial fibrillation: Results of two phase II open-label, dose-escalation studies. <i>J Am Coll Cardiol</i> 2009;53(10):A430-A431.                              | 816           | Intervention/Comparators |
| Kwong JS, Lam YY, Yan BP, Yu CM. Bleeding of new oral anticoagulants for stroke prevention in atrial fibrillation: a meta-analysis of randomized controlled trials. <i>Cardiovasc Drugs Ther</i> 2013 Feb;27(1):23-35.                                                                               | 13            | Study Design             |
| Lega JC, Mismetti P, Fassier T, Bertolotti L, Cucherat M, Vital-Durand D, et al. Double blind vs. open design on treatment effect of new oral anticoagulants in atrial fibrillation: A meta-analysis. <i>Fundamental and Clinical Pharmacology</i> 2012;26:17.                                       | 610           | Study Design             |
| Lip GY, Larsen TB, Skjoth F, Rasmussen LH. Indirect comparisons of new oral anticoagulant drugs for efficacy and safety when used for stroke prevention in atrial fibrillation. <i>J Am Coll Cardiol</i> 2012 Aug 21;60(8):738-46.                                                                   | 45            | Study Design             |
| Lip GYH, Edwards SJ. Stroke prevention with aspirin, warfarin and ximelagatran in patients with non-valvular atrial fibrillation: A systematic review and meta-analysis. <i>Thrombosis Research</i> 2006;118(3):321-33.                                                                              | 887           | Study Design             |



| <b>Reference</b>                                                                                                                                                                                                                                                                                                                                                                                                                           | <b>Ref ID</b> | <b>Reason</b>            |
|--------------------------------------------------------------------------------------------------------------------------------------------------------------------------------------------------------------------------------------------------------------------------------------------------------------------------------------------------------------------------------------------------------------------------------------------|---------------|--------------------------|
| Mak KH. Coronary and mortality risk of novel oral antithrombotic agents: a meta-analysis of large randomised trials. <i>BMJ Open</i> 2012;2(5).                                                                                                                                                                                                                                                                                            | 20            | Study Design             |
| Mant J, Hobbs R, Fletcher K, Roalfe A. Is warfarin a safe alternative to aspirin in elderly patients with atrial fibrillation? <i>Cardiology Review</i> 2008;25(7):32-6.                                                                                                                                                                                                                                                                   | 835           | Study Design             |
| Miller CS, Grandi SM, Shimony A, Filion KB, Eisenberg MJ. Meta-analysis of efficacy and safety of new oral anticoagulants (dabigatran, rivaroxaban, apixaban) versus warfarin in patients with atrial fibrillation (Provisional abstract). <i>American Journal of Cardiology</i> 2012;110:453-60.                                                                                                                                          | 1179          | Study Design             |
| Miller CS, Grandi SM, Shimony A, Filion KB, Eisenberg MJ. The efficacy and safety of new oral anticoagulants versus warfarin in patients with atrial fibrillation: A systematic review and meta-analysis. <i>Journal of Population Therapeutics and Clinical Pharmacology</i> 2012;19(2):e124.                                                                                                                                             | 541           | Study Design             |
| O'Dell KM, Igawa D, Hsin J. New Oral Anticoagulants for Atrial Fibrillation: A Review of Clinical Trials. <i>Clinical Therapeutics</i> 2012;34(4):894-901.                                                                                                                                                                                                                                                                                 | 609           | Study Design             |
| Optimal warfarin management for the prevention of thromboembolic events in patients with atrial fibrillation: a systematic review of the clinical evidence. <i>CADTH Technol Overv</i> 2012;2(3):e2304.                                                                                                                                                                                                                                    | 26            | Study Design             |
| Patel MR, Hellkamp AS, Lokhnygina Y, Piccini JP, Zhang Z, Mohanty S, et al. Outcomes of discontinuing rivaroxaban compared with warfarin in patients with nonvalvular atrial fibrillation: Analysis from the ROCKET AF trial (Rivaroxaban once-daily, oral, direct factor Xa inhibition compared with vitamin K antagonism for prevention of stroke and embolism trial in atrial fibrillation). <i>J Am Coll Cardiol</i> 2013;61(6):651-8. | 509           | Outcomes                 |
| Preliminary report of the Stroke Prevention in Atrial Fibrillation Study. <i>N Engl J Med</i> 1990 Mar 22;322(12):863-8.                                                                                                                                                                                                                                                                                                                   | 501           | Intervention/Comparators |
| Rasmussen LH, Larsen TB, Graungaard T, Skjoth F, Lip GY. Primary and secondary prevention with new oral anticoagulant drugs for stroke prevention in atrial fibrillation: indirect comparison analysis. <i>BMJ</i> 2012;345:e7097.                                                                                                                                                                                                         | 15            | Study Design             |
| Risk factors for stroke and efficacy of antithrombotic therapy in atrial fibrillation. Analysis of pooled data from five randomized controlled trials. <i>Arch Intern Med</i> 1994 Jul 11;154(13):1449-57.                                                                                                                                                                                                                                 | 469           | Study Design             |
| Roskell NS, Lip GY, Noack H, Clemens A, Plumb JM. Treatments for stroke prevention in atrial fibrillation: a network meta-analysis and indirect comparisons versus dabigatran etexilate. <i>Thromb Haemost</i> 2010 Dec;104(6):1106-15.                                                                                                                                                                                                    | 137           | Study Design             |
| Roskell NS, Samuel M, Noack H, Monz BU. Major bleeding in patients with atrial fibrillation receiving vitamin K antagonists: a systematic review of randomized and observational studies. <i>Europace</i> 2013 Feb 13.                                                                                                                                                                                                                     | 3             | Study Design             |
| Roversi S, Malavasi V, D'Ascenzo F, Abbate A, Castagno D, Van Tassell B, et al. Picking the best novel oral anticoagulant for atrial fibrillation: Evidence from a warfarin-controlled network meta-analysis. <i>J Am Coll Cardiol</i> 2012;59(13):E598.                                                                                                                                                                                   | 615           | Study Design             |

| <b>Reference</b>                                                                                                                                                                                                                                                                                               | <b>Ref ID</b> | <b>Reason</b>            |
|----------------------------------------------------------------------------------------------------------------------------------------------------------------------------------------------------------------------------------------------------------------------------------------------------------------|---------------|--------------------------|
| Schneeweiss S, Gagne JJ, Patrick AR, Choudhry NK, Avorn J. Comparative efficacy and safety of new oral anticoagulants in patients with atrial fibrillation. <i>Circ Cardiovasc Qual Outcomes</i> 2012 Jul 1;5(4):480-6.                                                                                        | 33            | Study Design             |
| Segal JB, McNamara R, Miller M, Powe N, Goodman SN, Robinson KA, et al. Anticoagulants or antiplatelet therapy for non-rheumatic atrial fibrillation and flutter. <i>Cochrane Database of Systematic Reviews</i> 2006.                                                                                         | 1168          | Study Design             |
| Segal JB, McNamara RL, Miller MR, Kim N, Goodman SN, Powe NR, et al. Prevention of thromboembolism in atrial fibrillation. A meta-analysis of trials of anticoagulants and antiplatelet drugs. <i>J Gen Intern Med</i> 2000 Jan;15(1):56-67.                                                                   | 405           | Study Design             |
| Simon TA, Jakouloff D, Mitchell SA, Raza SA, Lockhart I, Drost P. Heterogeneity in published evidence for stroke prevention in patients with atrial fibrillation: A systematic review. <i>Pharmacoepidemiology and Drug Safety</i> 2012;21:247-8.                                                              | 573           | Study Design             |
| Sobieraj DM, White CM, Alikhanov S, Winkler S, Mediouni M, Kluger J, et al. The impact of antiplatelet and anticoagulant therapies on gastrointestinal symptoms in patients with atrial fibrillation: A systematic review. <i>Annals of Pharmacotherapy</i> 2012;46(9):1220-31.                                | 563           | Study Design             |
| Stroke Prevention in Atrial Fibrillation Study. Final results. <i>Circulation</i> 1991 Aug;84(2):527-39.                                                                                                                                                                                                       | 494           | Intervention/Comparators |
| Taylor FC, Cohen H, Ebrahim S. Systematic review of long term anticoagulation or antiplatelet treatment in patients with non-rheumatic atrial fibrillation. <i>BMJ</i> 2001 Feb 10;322(7282):321-6.                                                                                                            | 380           | Study Design             |
| Testa L, Agnifili M, Latini RA, Mattioli R, Lanotte S, De Marco F, et al. Adjusted indirect comparison of new oral anticoagulants for stroke prevention in atrial fibrillation. <i>QJM</i> 2012;105(10):949-57.                                                                                                | 555           | Study Design             |
| Uchino K, Hernandez AV. Dabigatran is associated with higher risk of myocardial infarction or acute coronary syndromes: A meta-analysis of non-inferiority randomized controlled trials. <i>Circulation</i> 2011;124(21).                                                                                      | 649           | Study Design             |
| Van Latum JC. The 'European atrial fibrillation study': Secondary prevention of thromboembolic complications with oral anticoagulants or acetylsalicylic acid in patients with non-rheumatic atrial fibrillation. <i>Nederlands Tijdschrift voor Geneeskunde</i> 1994;138(20):1025-31.                         | 1149          | Study Design             |
| van WC, Hart RG, Singer DE, Laupacis A, Connolly S, Petersen P, et al. Oral anticoagulants vs aspirin in nonvalvular atrial fibrillation: an individual patient meta-analysis. <i>JAMA</i> 2002 Nov 20;288(19):2441-8.                                                                                         | 350           | Study Design             |
| Wasserlauf G, Grandi SM, Fillion KB, Eisenberg MJ. Safety of rivaroxaban versus vitamin K antagonists: A systematic review and meta-analysis. <i>Circulation</i> 2012;126(21).                                                                                                                                 | 530           | Study Design             |
| Yasaka M, Inoue H, Kawai Y, Yamaguchi T, Uchiyama S, Matsumoto M, et al. Randomized, parallel group, warfarin control, multicenter phase II study evaluating safety of DU-176b in Japanese subjects with non-valvular atrial fibrillation (NVAf). <i>Journal of Thrombosis and Haemostasis</i> 2009;7(S2):692. | 792           | Study Design             |

### **Studies Excluded from the Meta-analysis (n = 29)**

| Reference                                                                                                                                                                                                                                                                                                                                                                                                                                                                                                                                              | Ref ID | Reason                     |
|--------------------------------------------------------------------------------------------------------------------------------------------------------------------------------------------------------------------------------------------------------------------------------------------------------------------------------------------------------------------------------------------------------------------------------------------------------------------------------------------------------------------------------------------------------|--------|----------------------------|
| Al-Khatib, S. M.; Thomas, L.; Wallentin, L.; Lopes, R. D.; Gersh, B.; Garcia, D.; Ezekowitz, J.; Alings, M.; Yang, H.; Alexander, J. H.; Flaker, G.; Hanna, M.; Granger, C. B. Outcomes of apixaban vs. warfarin by type and duration of atrial fibrillation: Results from the ARISTOTLE trial. <i>European Heart Journal</i> 2013, 34 (31), 2464-2471.                                                                                                                                                                                                | R_127  | Subgroup of no interest    |
| BAY59-7939 in Atrial Fibrillation Once Daily (OD). NCT00973245. Available at <a href="http://clinicaltrials.gov/ct2/show/NCT00973245?term=anticoagulant&amp;cond=atrial+fibrillation&amp;intr=anticoagulant&amp;phase=123&amp;rank=34">http://clinicaltrials.gov/ct2/show/NCT00973245?term=anticoagulant&amp;cond=atrial+fibrillation&amp;intr=anticoagulant&amp;phase=123&amp;rank=34</a> . Accessed March 26, 2013.                                                                                                                                  |        | Not enough information     |
| BAY59-7939 Japanese in Atrial Fibrillation (2nd). NCT00973323. Available at <a href="http://clinicaltrials.gov/ct2/show/NCT00973323?term=anticoagulant&amp;cond=atrial+fibrillation&amp;intr=anticoagulant&amp;phase=123&amp;rank=33">http://clinicaltrials.gov/ct2/show/NCT00973323?term=anticoagulant&amp;cond=atrial+fibrillation&amp;intr=anticoagulant&amp;phase=123&amp;rank=33</a> . Accessed March 26, 2013.                                                                                                                                   |        | Not enough information     |
| Bleeding during antithrombotic therapy in patients with atrial fibrillation. The Stroke Prevention in Atrial Fibrillation Investigators. <i>Arch Intern Med</i> 1996 Feb 26;156(4):409-16.                                                                                                                                                                                                                                                                                                                                                             | 454    | Methodological differences |
| Connolly SJ, Ezekowitz MD, Yusuf S, Reilly PA, Wallentin L; Randomized Evaluation of Long-Term Anticoagulation Therapy Investigators. Newly identified events in the RE-LY trial. <i>N Engl J Med</i> . 2010 Nov 4;363(19):1875-6.                                                                                                                                                                                                                                                                                                                     |        | Supporting document        |
| FDA Briefing Information 2010. Clinical Review: Pradaxa (dabigatran)                                                                                                                                                                                                                                                                                                                                                                                                                                                                                   |        | Supporting document        |
| FDA Draft Briefing Document for Xarelto® (rivaroxaban) 2011                                                                                                                                                                                                                                                                                                                                                                                                                                                                                            |        | Supporting document        |
| FDA Medical Review on Apixaban 2012                                                                                                                                                                                                                                                                                                                                                                                                                                                                                                                    |        | Supporting document        |
| Gullov AL, Koefoed BG, Petersen P. Bleeding during warfarin and aspirin therapy in patients with atrial fibrillation: the AFASAK 2 study. <i>Atrial Fibrillation Aspirin and Anticoagulation. Arch Intern Med</i> 1999 Jun 28;159(12):1322-8.                                                                                                                                                                                                                                                                                                          | 424    | Subgroup of no interest    |
| Halperin HL, Hankey GJ, Wojdyla D, Piccini JP, Lokhnygina Y, Patel MR, Breithardt G, Singer DE, Becker RC, Hacke W, Paolini JP, Nessel CC, Mahaffey KW, Califf RM, Fox KA. Efficacy and Safety of Rivaroxaban Compared with Warfarin Among Elderly Patients with Nonvalvular Atrial Fibrillation in the ROCKET-AF Trial. Presented at: American Heart Association (AHA) Scientific Sessions 2012; Feb 02.                                                                                                                                              |        | Not enough information     |
| Hankey GJ, Stevens S, Piccini JP, Lokhnygina Y, Mahaffey KW, Halperin JL, Patel MR, Breithardt G, Singer DE, Becker RC, Paolini JP, Nessel CC, Hacke W, Fox KA, Califf RM. Predictors of Intracranial Hemorrhage Among Anticoagulated Patients with Atrial Fibrillation: Insights from the Rivaroxaban Once-daily oral Direct Factor Xa Inhibition Compared with Vitamin K Antagonism for Prevention of Stroke and Embolism Trial in Atrial Fibrillation (ROCKET AF). Presented at: American Heart Association (AHA) Scientific Sessions 2012; Feb 02. |        | Subgroup of no interest    |
| Hart RG, Diener HC, Yang S, Connolly SJ, Wallentin L, Reilly PA, et al. Intracranial hemorrhage in atrial fibrillation patients during anticoagulation with warfarin or dabigatran: the RE-LY trial. <i>Stroke</i> 2012 Jun;43(6):1511-7.                                                                                                                                                                                                                                                                                                              | 52     | Subgroup of no interest    |

| Reference                                                                                                                                                                                                                                                                                                                                                                                                                        | Ref ID | Reason                     |
|----------------------------------------------------------------------------------------------------------------------------------------------------------------------------------------------------------------------------------------------------------------------------------------------------------------------------------------------------------------------------------------------------------------------------------|--------|----------------------------|
| Hohnloser SH, Hijazi Z, Thomas L, Alexander JH, Amerena J, Hanna M, Keltai M, Lanas F, Lopes RD, Lopez-Sendon J, Granger CB, Wallentin L. Efficacy of apixaban when compared with warfarin in relation to renal function in patients with atrial fibrillation: insights from the ARISTOTLE trial. <i>Eur Heart J</i> . 2012 Nov;33(22):2821-30 [Abstract]                                                                        |        | Not enough information     |
| Hohnloser SH, Oldgren J, Yang S, Wallentin L, Ezekowitz M, Reilly P, et al. Myocardial ischemic events in patients with atrial fibrillation treated with dabigatran or warfarin in the RE-LY (Randomized Evaluation of Long-Term Anticoagulation Therapy) trial. <i>Circulation</i> 2012 Feb 7;125(5):669-76.                                                                                                                    | 69     | Subgroup of no interest    |
| Hori M, Connolly SJ, Ezekowitz MD, Reilly PA, Yusuf S, Wallentin L. Efficacy and safety of dabigatran vs. warfarin in patients with atrial fibrillation--sub-analysis in Japanese population in RE-LY trial. <i>Circ J</i> 2011;75(4):800-5.                                                                                                                                                                                     | 113    | Subgroup of no interest    |
| Hori, M.; Connolly, S. J.; Zhu, J.; Liu, L. S.; Lau, C. P.; Pais, P.; Xavier, D.; Kim, S. S.; Omar, R.; Dans, A. L.; Tan, R. S.; Chen, J. H.; Tanomsup, S.; Watanabe, M.; Koyanagi, M.; Ezekowitz, M. D.; Reilly, P. A.; Wallentin, L.; Yusuf, S. Dabigatran versus warfarin: effects on ischemic and hemorrhagic strokes and bleeding in Asians and non-Asians with atrial fibrillation. <i>Stroke</i> 2013, 44 (7), 1891-1896. | R_45   | Subgroup of no interest    |
| Hori, M.; Matsumoto, M.; Tanahashi, N.; Momomura, S. I.; Uchiyama, S.; Goto, S.; Izumi, T.; Koretsune, Y.; Kajikawa, M.; Kato, M.; Ueda, H.; Iwamoto, K.; Tajiri, M. Safety and efficacy of adjusted dose of rivaroxaban in Japanese patients with non-valvular atrial fibrillation - Subanalysis of J-ROCKET AF for patients with moderate renal impairment. <i>Circulation Journal</i> 2013, 77 (3), 632-638.                  | R_189  | Subgroup of no interest    |
| Hu DY, Zhang HP, Sun YH, Jiang LQ. [The randomized study of efficiency and safety of anti-thrombotic therapy in nonvalvular atrial fibrillation: warfarin compared with aspirin]. <i>Zhonghua Xin Xue Guan Bing Za Zhi</i> 2006 Apr;34(4):295-8.                                                                                                                                                                                 | 257    | Methodological differences |
| Jones, W. S.; Hellkamp, A. S.; Halperin, J.; Piccini, J. P.; Breithardt, G.; Singer, D. E.; Fox, K. A.; Hankey, G. J.; Mahaffey, K. W.; Califf, R. M.; Patel, M. R. Efficacy and safety of rivaroxaban compared with warfarin in patients with peripheral artery disease and non-valvular atrial fibrillation: insights from ROCKET AF. <i>Eur. Heart J</i> 2013.                                                                | R_4    | Subgroup of no interest    |
| Lu Y, Zhang J. Anticoagulant treatment on chronic non-valvular atrial fibrillation in the elderly patients. <i>Chinese Journal of Emergency Medicine</i> 2006;15(1):54-6.                                                                                                                                                                                                                                                        | 901    | Methodological differences |
| Miller VT, Pearce LA, Feinberg WM, Rothrock JF, Anderson DC, Hart RG. Differential effect of aspirin versus warfarin on clinical stroke types in patients with atrial fibrillation. <i>Stroke Prevention in Atrial Fibrillation Investigators</i> . <i>Neurology</i> 1996 Jan;46(1):238-40.                                                                                                                                      | 456    | Subgroup of no interest    |
| NICE. Apixaban (Eliquis®) for the prevention of stroke and systemic embolism in people with non-valvular atrial fibrillation. Submitted by Bristol-Myers. Single Technology Appraisal (STA) August 2012                                                                                                                                                                                                                          |        | Supporting document        |
| NICE. Single Technology Appraisal (STA) of Rivaroxaban (Xarelto®). Submitted by Bayer Plc. August 2011                                                                                                                                                                                                                                                                                                                           |        | Supporting document        |

| Reference                                                                                                                                                                                                                                                                                                                                                                                                                                                                                                      | Ref ID | Reason                     |
|----------------------------------------------------------------------------------------------------------------------------------------------------------------------------------------------------------------------------------------------------------------------------------------------------------------------------------------------------------------------------------------------------------------------------------------------------------------------------------------------------------------|--------|----------------------------|
| NICE. Single Technology Appraisal (STA). Atrial fibrillation. Dabigatran etexilate. Submitted by Boehringer Ingelheim. October 2009                                                                                                                                                                                                                                                                                                                                                                            |        | Supporting document        |
| Secondary prevention in non-rheumatic atrial fibrillation after transient ischaemic attack or minor stroke. EAFT (European Atrial Fibrillation Trial) Study Group. <i>Lancet</i> 1993 Nov 20;342(8882):1255-62.                                                                                                                                                                                                                                                                                                | 476    | Methodological differences |
| Tanahashi, N.; Hori, M.; Matsumoto, M.; Momomura, S. I.; Uchiyama, S.; Goto, S.; Izumi, T.; Koretsune, Y.; Kajikawa, M.; Kato, M.; Ueda, H.; Iwamoto, K.; Tajiri, M. Rivaroxaban versus warfarin in Japanese patients with nonvalvular atrial fibrillation for the secondary prevention of stroke: A subgroup analysis of J-ROCKET AF. <i>Journal of Stroke and Cerebrovascular Diseases</i> 2013, 22 (8), 1317-1325.                                                                                          | R_75   | Subgroup of no interest    |
| The Effect and Safety of Different Intensity Anticoagulation Therapy in Elderly Patients With Non-valvular Atrial Fibrillation. NCT01438580. Available at <a href="http://clinicaltrials.gov/ct2/show/study/NCT01438580?term=anticoagulant&amp;cond=atrial+fibrillation&amp;intr=anticoagulant&amp;phase=123&amp;rank=50">http://clinicaltrials.gov/ct2/show/study/NCT01438580?term=anticoagulant&amp;cond=atrial+fibrillation&amp;intr=anticoagulant&amp;phase=123&amp;rank=50</a> . Accessed March 26, 2013. |        | Not enough information     |
| The effect of low-dose warfarin on the risk of stroke in patients with nonrheumatic atrial fibrillation. The Boston Area Anticoagulation Trial for Atrial Fibrillation Investigators. <i>N Engl J Med</i> 1990 Nov 29;323(22):1505-11.                                                                                                                                                                                                                                                                         | 497    | Methodological differences |
| Warfarin versus aspirin for prevention of thromboembolism in atrial fibrillation: Stroke Prevention in Atrial Fibrillation II Study. <i>Lancet</i> 1994 Mar 19;343(8899):687-91.                                                                                                                                                                                                                                                                                                                               | 471    | Methodological differences |

## REFERENCES

1. Lopes RD, Al-Khatib SM, Wallentin L, et al. Efficacy and safety of apixaban compared with warfarin according to patient risk of stroke and of bleeding in atrial fibrillation: a secondary analysis of a randomised controlled trial. *Lancet*. 2012;380(9855):1749-1758.
2. Oldgren J, Alings M, Darius H, et al.; RE-LY Investigators. Risks for stroke, bleeding, and death in patients with atrial fibrillation receiving dabigatran or warfarin in relation to the CHADS2 score: a subgroup analysis of the RE-LY trial. *Ann Intern Med*. 2011;155(10):660-667, W204.

3. Granger CB, Alexander JH, McMurray JJ, et al.; ARISTOTLE Committees and Investigators. Apixaban versus warfarin in patients with atrial fibrillation. *N Engl J Med.* 2011;365(11):981-992.
4. Patel MR, Mahaffey KW, Garg J, et al.; ROCKET AF Investigators. Rivaroxaban versus warfarin in nonvalvular atrial fibrillation. *N Engl J Med.* 2011;365(10):883-891.
5. Connolly SJ, Ezekowitz MD, Yusuf S, et al.; RE-LY Steering Committee and Investigators. Dabigatran versus warfarin in patients with atrial fibrillation. *N Engl J Med.* 2009;361(12):1139-1151.
6. Giugliano RP, Ruff CT, Braunwald E, et al.; ENGAGE AF-TIMI 48 Investigators. Edoxaban versus warfarin in patients with atrial fibrillation. *N Engl J Med.* 2013;369(22):2093-2104.
